# Supplementary material for: Cationic palladium(ii)-catalyzed synthesis of substituted pyridines from α,β-unsaturated oxime ethers
Source: Royal Society of Chemistry journal article supplement (doi:10.1039/d2ra03875g), 2022-01-01
Supplement: d2ra03875g1.pdf [file d2ra03875g1.pdf]

# Cationic Palladium(II)-Catalyzed Synthesis of Substituted Pyridines from $\alpha,\beta$ -Unsaturated Oxime Ethers

## Supporting Information

Takahiro Yamada, Yoshimitsu Hashimoto, Kosaku Tanaka, III, Nobuyoshi Morita and Osamu Tamura\*

*Showa Pharmaceutical University, 3-3165 Higashi-Tamagawagakuen, Machida, Tokyo 194-8543, Japan*

E-mail: tamura@ac.shoyaku.ac.jp

## Table of contents

|                                                                                            |     |
|--------------------------------------------------------------------------------------------|-----|
| General methods.....                                                                       | S2  |
| Pyridine ligand optimization.....                                                          | S2  |
| Oxime ether optimization.....                                                              | S3  |
| Reaction optimization.....                                                                 | S4  |
| General procedure for substituted pyridine synthesis.....                                  | S5  |
| Investigation of the amount of catalysts and oxidant.....                                  | S5  |
| Control experiments with specific substrates and conditions.....                           | S6  |
| Preparation of ligands.....                                                                | S11 |
| Preparation of substrates.....                                                             | S12 |
| Palladium(II)-catalyzed substituted pyridine synthesis.....                                | S20 |
| $\omega$ B97X-D/6-311+G(d,p) Calculated cartesian coordinates.....                         | S36 |
| Crystallographic description of 2-benzylidenecyclopentenone oxime ether ( <b>18</b> )..... | S39 |
| References .....                                                                           | S39 |
| NMR data of new compounds.....                                                             | S40 |

## General methods

$^1\text{H}$  and  $^{13}\text{C}$  NMR spectra were recorded with BRUKER AV300M spectrometer at room temperature, with tetramethylsilane ( $\delta = 0$ ) as an internal standard ( $\text{CDCl}_3$  solution). Chemical shifts were expressed in ppm, and coupling constants ( $J$ ) in Hz. Infrared (IR) spectra were recorded with a Shimadzu IRSpirit. Mass spectra were recorded on JEOL JMS-700 and JMS-T100LP spectrometers. Melting points were determined by using a Yanaco melting point apparatus MP-S3. Merck silica gel 60 F254 and Wako  $\text{NH}_2$  silica gel 60 F254 were used for thin layer chromatography (TLC). Merck silica gel 60 (1.09385) and Kanto Chemical silica gel 60 (spherical)  $\text{NH}_2$  were used for column chromatography, and the all pyridine products were purified by flash column chromatography on  $\text{NH}_2$  silica gel as previously reported.<sup>1</sup> All computations were carried out with the Gaussian 09 series of programs.<sup>2</sup> All compounds were calculated with  $\omega\text{B97X-D/6-311+G(d,p)}$ , and an ultrafine grid was used for geometry optimization.

## Pyridine ligand optimization

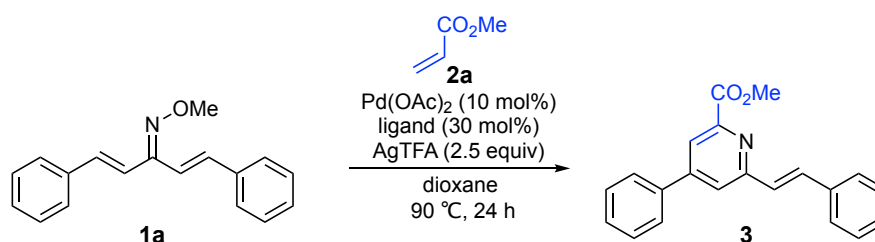

### General procedure for pyridine ligand optimization using $\alpha,\beta$ -unsaturated oxime ether **1a**<sup>1</sup>

To a solution of  $\alpha,\beta$ -unsaturated oxime **1a** (0.2 mmol, 1.0 eq.), methyl acrylate (**2a**, 0.6 mmol, 3.0 eq.),  $\text{AgTFA}$  (0.5 mmol, 2.5 eq.), and ligand (0.06 mmol, 30 mol%) in dioxane (2.0 mL) was added  $\text{Pd}(\text{OAc})_2$  (0.02 mmol, 10 mol%). The reaction mixture was stirred at 90 °C (silicone oil bath) for 24 h, then diluted with  $\text{AcOEt}$  and filtered through a Celite<sup>®</sup> pad (rinsed with  $\text{AcOEt}$ ). The filtrate was concentrated in *vacuo*, and the crude product was purified by flash column chromatography on  $\text{NH}_2$  silica gel (hexane :  $\text{AcOEt}$  = 3 : 1) to afford the desired pyridine **3** as a white solid.

## Oxime ether optimization

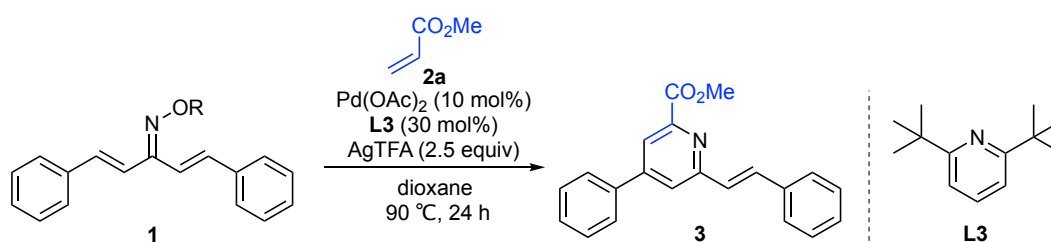

### General procedure for oxime ether optimization<sup>1</sup>

To a solution of  $\alpha,\beta$ -unsaturated oxime **1** (0.2 mmol, 1.0 eq.), methyl acrylate (**2a**, 0.6 mmol, 3.0 eq.),  $\text{AgTFA}$  (0.5 mmol, 2.5 eq.), and **L3** (0.06 mmol, 30 mol%) in dioxane (2.0 mL) was added  $\text{Pd}(\text{OAc})_2$  (0.02 mmol, 10 mol%). The reaction mixture was stirred at 90 °C (silicone oil bath) for 24 h, then diluted with  $\text{AcOEt}$  and filtered through a Celite<sup>®</sup> pad (rinsed with  $\text{AcOEt}$ ). The filtrate was concentrated in *vacuo*, and the crude product was purified by flash column chromatography on  $\text{NH}_2$  silica gel (hexane :  $\text{AcOEt}$  = 3 : 1) to afford the desired pyridine **3**.

### Reaction with oxime **1d**

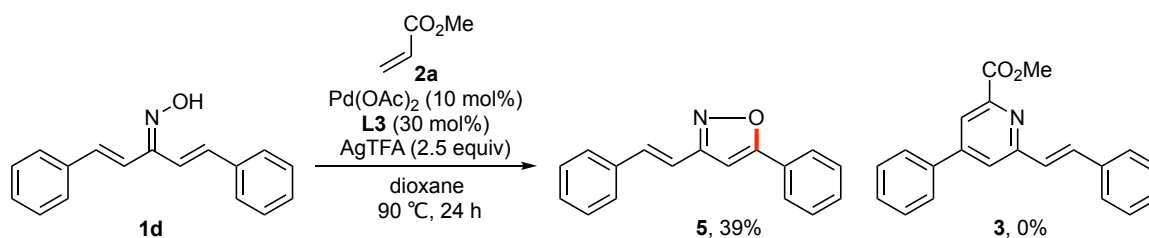

To a solution of  $\alpha,\beta$ -unsaturated oxime **1d** (50 mg, 0.2 mmol, 1.0 eq.), methyl acrylate (**2a**, 0.6 mmol, 3.0 eq.),  $\text{AgTFA}$  (0.5 mmol, 2.5 eq.), and **L3** (0.06 mmol, 30 mol%) in dioxane (2.0 mL) was added  $\text{Pd}(\text{OAc})_2$  (0.02 mmol, 10 mol%). The reaction mixture was stirred at 90 °C (silicone oil bath) for 24 h, then diluted with  $\text{AcOEt}$  and filtered through a Celite<sup>®</sup> pad (rinsed with  $\text{AcOEt}$ ). The filtrate was concentrated in *vacuo*, and the crude product was purified by flash column chromatography on  $\text{NH}_2$  silica gel (hexane :  $\text{AcOEt}$  = 3 : 1) to afford isoxazole **5**<sup>3</sup> (19.8 mg, 39% yield) as a white solid. <sup>1</sup>H NMR ( $\text{CDCl}_3$ , 300 MHz)  $\delta$  7.83 (dd, 2H,  $J$  = 10.4, 2.4 Hz), 7.16–7.57 (m, 10H), 6.77 (s, 1H). Spectra data of obtained product was in good agreement with previously reported literature.<sup>3b</sup>

## Reaction optimization

To a solution of  $\alpha,\beta$ -unsaturated oxime **1** (0.2 mmol, 1.0 eq.), methyl acrylate (**2a**, 0.6 mmol, 3.0 eq.), oxidant (x equiv), and ligand (0.06 mmol, 30 mol%) in dioxane (2.0 mL) was added Pd cat. (0.02 mmol, 10 mol%). The reaction mixture was stirred at 90 °C (silicone oil bath) for 24 h, then diluted with AcOEt and filtered through a Celite<sup>®</sup> pad (rinsed with AcOEt). The filtrate was concentrated in *vacuo*, and the crude product was purified by flash column chromatography on NH<sub>2</sub> silica gel (hexane : AcOEt = 3 : 1) to afford the desired pyridine **3**.

**Table S1.** Reaction optimization.

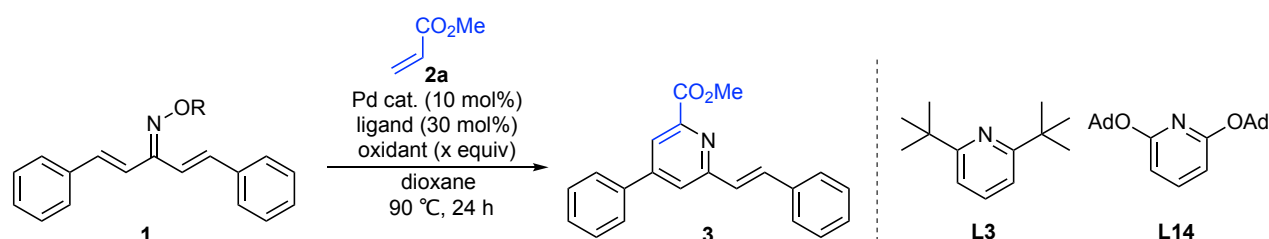

| entry | OR                | Pd cat.              | ligand     | oxidant | x equiv. | yield |
|-------|-------------------|----------------------|------------|---------|----------|-------|
| 1     | OMe               | Pd(OAc) <sub>2</sub> | <b>L3</b>  | AgTFA   | 2.5      | 47%   |
| 2     | OMe               | Pd(OAc) <sub>2</sub> | <b>L3</b>  | none    | 2.5      | 0%    |
| 3     | OMe               | PdCl <sub>2</sub>    | <b>L3</b>  | AgTFA   | 2.5      | 10%   |
| 4     | OMe               | Pd(TFA) <sub>2</sub> | <b>L3</b>  | AgTFA   | 2.5      | 53%   |
| 5     | OMe               | Pd(TFA) <sub>2</sub> | <b>L3</b>  | AgOAc   | 2.5      | trace |
| 6     | O <sup>i</sup> Pr | Pd(OAc) <sub>2</sub> | <b>L3</b>  | AgTFA   | 2.5      | 69%   |
| 7     | O <sup>i</sup> Pr | Pd(OAc) <sub>2</sub> | <b>L14</b> | AgTFA   | 2.5      | 76%   |
| 8     | O <sup>i</sup> Pr | Pd(OAc) <sub>2</sub> | <b>L14</b> | AgTFA   | 4.0      | 77%   |
| 9     | O <sup>i</sup> Pr | Pd(OAc) <sub>2</sub> | <b>L14</b> | AgTFA   | 5.0      | 85%   |

## General procedure for substituted pyridine synthesis<sup>1</sup>

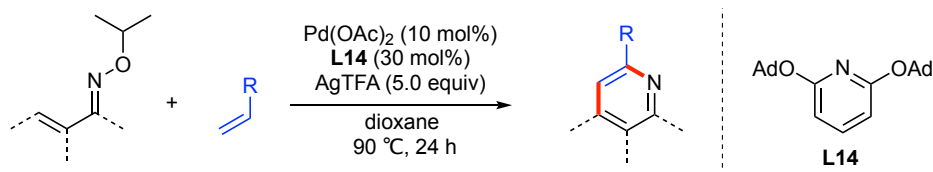

All  $\alpha,\beta$ -unsaturated oxime ethers used in this work were *E*-isomer. *E*- and *Z*-isomers were easily separated by flash column chromatography.

**General Procedure A :** To a solution of  $\alpha,\beta$ -unsaturated oxime (1.0 eq.), alkene (3.0 eq.), AgTFA (5.0 eq.), and **L14** (30 mol%) in dioxane (2.0 mL) was added Pd(OAc)<sub>2</sub> (10 mol%). The reaction mixture was stirred at 90 °C (silicone oil bath) for 24 h, then diluted with AcOEt and filtered through a Celite<sup>®</sup> pad (rinsed with AcOEt). The filtrate was concentrated in *vacuo*, and the crude product was purified by flash column chromatography on NH<sub>2</sub> silica gel.

**General Procedure B :** To a solution of  $\alpha,\beta$ -unsaturated oxime (1.0 eq.), alkene (1.5 eq.), AgTFA (5.0 eq.), and **L14** (30 mol%) in dioxane (2.0 mL) was added Pd(OAc)<sub>2</sub> (10 mol%). The reaction mixture was stirred at 90 °C (silicone oil bath) for 24 h, then diluted with AcOEt and filtered through a Celite<sup>®</sup> pad (rinsed with AcOEt). The filtrate was concentrated in *vacuo*, and the crude product was purified by flash column chromatography on NH<sub>2</sub> silica gel.

## Investigation of the amount of catalysts and oxidant

To a solution of  $\alpha,\beta$ -unsaturated oxime **18** (0.2 mmol, 1.0 eq.), pentafluorostyrene (**2r**, 0.6 mmol, 3.0 eq.), AgTFA (z equiv), and **L14** (y mol%) in dioxane (2.0 mL) was added Pd(OAc)<sub>2</sub> (x mol%). The reaction mixture was stirred at 90 °C (silicone oil bath), then diluted with AcOEt and filtered through a Celite<sup>®</sup> pad (rinsed with AcOEt). The filtrate was concentrated in *vacuo*, and the crude product was purified by flash column chromatography on NH<sub>2</sub> silica gel (hexane : AcOEt = 3 : 1) to afford the pyridine **74** as a white solid.

**Table S2.** Investigation of the amount of catalysts and oxidant.

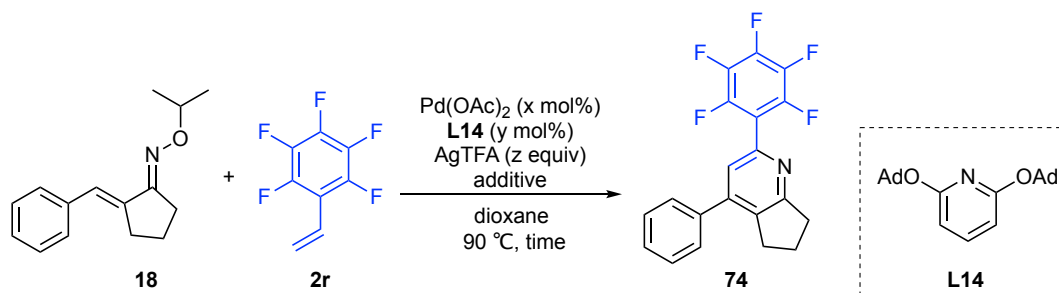

| entry | Pd(OAc) <sub>2</sub><br>(x mol%) | <b>L14</b><br>(y mol%) | AgTFA<br>(z equiv) | time | yield |
|-------|----------------------------------|------------------------|--------------------|------|-------|
| 1     | 10                               | 30                     | 5.0                | 24 h | 83%   |
| 2     | 1                                | 3                      | 5.0                | 80 h | 77%   |
| 3     | 10                               | 30                     | 1.2                | 24 h | 27%   |
| 4     | 10                               | 30                     | 2.5                | 24 h | 44%   |
| 5     | 10                               | 30                     | 10                 | 24 h | 91%   |

## Control experiments with specific substrates and conditions

### Pyridine synthesis with *Z*-oxime

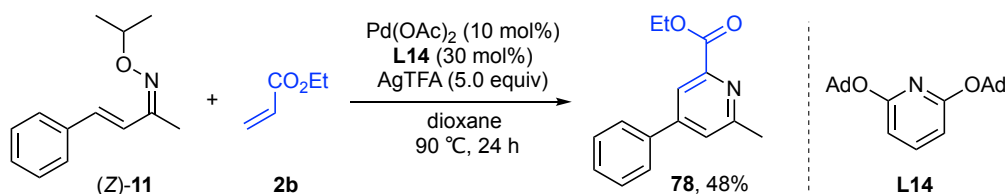

To a solution of *(Z)*-**11** (41 mg, 0.2 mmol, 1.0 eq.), ethyl acrylate (**2b**, 0.6 mmol, 3.0 eq.), AgTFA (1.0 mmol, 5.0 eq.), and **L14** (0.06 mmol, 30 mol%) in dioxane (2.0 mL) was added Pd(OAc)<sub>2</sub> (0.02 mmol, 10 mol%). The reaction mixture was stirred at 90 °C (silicone oil bath) for 24 h, then diluted with AcOEt and filtered through a Celite<sup>®</sup> pad (rinsed with AcOEt). The filtrate was concentrated in *vacuo*, and the crude product was purified by flash column chromatography on NH<sub>2</sub> silica gel (hexane : AcOEt = 3 : 1) to afford the desired pyridine **78** (21 mg, 48% yield) as a pale yellow oil. IR (KBr) 2980, 1716, 1605, 1553, 1379, 1338, 1251, 1145, 1079, 1025, 769, 696, 633 cm<sup>-1</sup>; <sup>1</sup>H NMR (CDCl<sub>3</sub>, 300 MHz) δ 8.18 (d, 1H, *J* = 1.2 Hz), 7.67 (d, 2H, *J* = 8.1 Hz), 7.56–7.40 (m, 4H), 4.51 (q, 2H, *J* = 7.2 Hz), 2.72 (s, 3H), 1.46 (t, 3H, *J* = 7.2 Hz). <sup>13</sup>C{<sup>1</sup>H} NMR (CDCl<sub>3</sub>, 75 MHz) δ 165.5, 159.4, 149.6, 148.4, 137.4, 129.3, 129.1, 127.0, 124.3, 120.5, 61.9, 24.7, 14.3; HRMS (EI-quadrupole) *m/z*: [M]<sup>+</sup> Calcd for C<sub>15</sub>H<sub>15</sub>NO<sub>2</sub>, 241.1103; found, 241.1105.

### Pyridine synthesis with *E*-oxime **11**

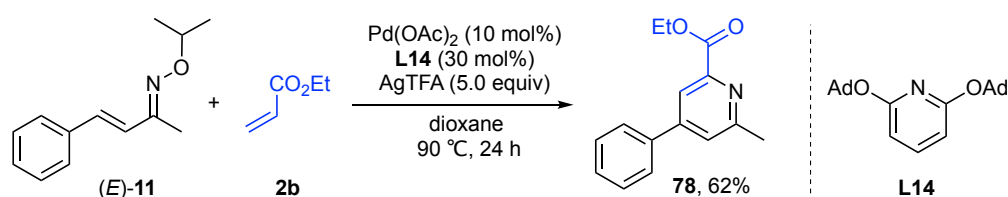

To a solution of *(E)*-**11** (41 mg, 0.2 mmol, 1.0 eq.), ethyl acrylate (**2b**, 0.6 mmol, 3.0 eq.), AgTFA (1.0 mmol, 5.0 eq.), and **L14** (0.06 mmol, 30 mol%) in dioxane (2.0 mL) was added Pd(OAc)<sub>2</sub> (0.02 mmol, 10 mol%). The reaction mixture was stirred at 90 °C (silicone oil bath) for 24 h, then diluted with AcOEt and filtered through a Celite<sup>®</sup> pad (rinsed with AcOEt). The filtrate was concentrated in *vacuo*, and the crude product was purified by flash column chromatography on NH<sub>2</sub> silica gel (hexane : AcOEt = 3 : 1) to afford the pyridine **78** (30 mg, 62% yield) as a pale yellow oil.

**Table S3.** Competitive experiments.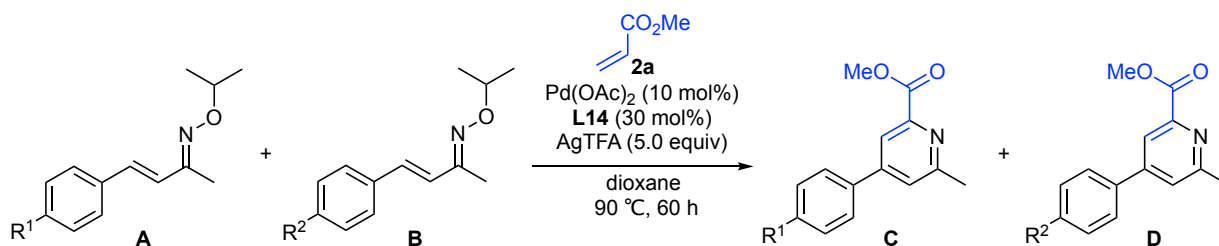

| entry | Substrates                    |                               | Product yield |          |            |
|-------|-------------------------------|-------------------------------|---------------|----------|------------|
|       | $R^1$ ( <b>A</b> , <b>C</b> ) | $R^2$ ( <b>B</b> , <b>D</b> ) | <b>C</b>      | <b>D</b> | <b>C/D</b> |
| 1     | Me                            | Cl                            | 53%           | 27%      | 1.9        |
| 2     | OMe                           | Me                            | 52%           | 29%      | 1.8        |
| 3     | Me                            | H                             | 75%           | 44%      | 1.7        |
| 4     | H                             | Cl                            | 34%           | 26%      | 1.3        |

To a solution of  $\alpha,\beta$ -unsaturated oxime **A** (0.2 mmol, 1.0 eq.),  $\alpha,\beta$ -unsaturated oxime **B** (0.2 mmol, 1.0 eq.), methyl acrylate (**2a**, 0.6 mmol, 3.0 eq.), AgTFA (1.0 mmol, 5.0 eq.), and **L14** (0.06 mmol, 30 mol%) in dioxane (2.0 mL) was added  $\text{Pd}(\text{OAc})_2$  (0.02 mmol, 10 mol%). The reaction mixture was stirred at 90 °C (silicone oil bath) for 60 h, then diluted with AcOEt and filtered through a Celite<sup>®</sup> pad (rinsed with AcOEt). The filtrate was concentrated in *vacuo*, and the crude product was purified by flash column chromatography on  $\text{NH}_2$  silica gel (hexane : AcOEt = 2 : 1) to afford the corresponding pyridines **C** and **D** as a mixture. The product yields and the ratio of the pyridine product (**C/D**) were determined by  $^1\text{H}$  NMR analysis of the isolated products.

**Table S4.** Control experiments.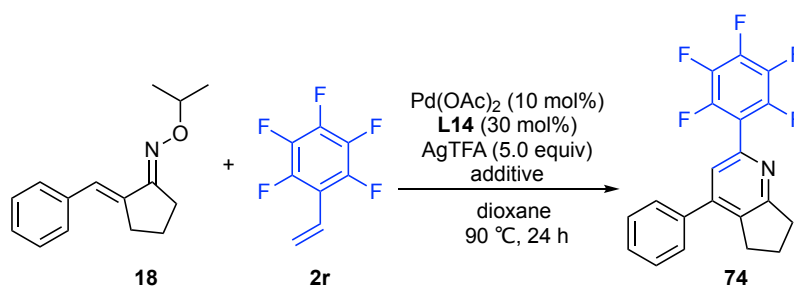

| entry | additive                  | yield (%) |
|-------|---------------------------|-----------|
| 1     | none                      | 83        |
| 2     | MeOH (1.0 equiv)          | 54        |
| 3     | <i>i</i> PrOH (1.0 equiv) | 66        |

To a solution of  $\alpha,\beta$ -unsaturated oxime **18** (0.2 mmol, 1.0 eq.), pentafluorostyrene (**2r**, 0.6 mmol, 3.0 eq.), AgTFA (1.0 mmol, 5.0 eq.), **L14** (0.06 mmol, 30 mol%), and additive (0.2 mmol, 1.0 eq.) in

dioxane (2.0 mL) was added Pd(OAc)<sub>2</sub> (0.02 mmol, 10 mol%). The reaction mixture was stirred at 90 °C (silicone oil bath) for 24 h, then diluted with AcOEt and filtered through a Celite<sup>®</sup> pad (rinsed with AcOEt). The filtrate was concentrated in *vacuo*, and the crude product was purified by flash column chromatography on NH<sub>2</sub> silica gel (hexane : AcOEt = 3 : 1) to afford the desired pyridine **74** as a white solid. mp 102–103 °C; IR (KBr) 1522, 1501, 1219, 990, 772 cm<sup>-1</sup>; <sup>1</sup>H NMR (CDCl<sub>3</sub>, 300 MHz) δ 7.60–7.30 (m, 5H), 7.26 (s, 1H), 3.25–3.09 (m, 4H), 2.30–2.15 (m, 2H). <sup>13</sup>C{<sup>1</sup>H} NMR (CDCl<sub>3</sub>, 75 MHz) δ 167.4, 146.3 (m), 146.0, 144.7, 143.0 (m), 139.4 (m), 138.0, 136.1 (m), 135.3, 128.7, 128.6, 128.2, 123.0, 115.8 (m), 34.6, 30.8, 23.4; HRMS (EI-quadrupole) *m/z*: [M]<sup>+</sup> Calcd for C<sub>20</sub>H<sub>12</sub>F<sub>5</sub>N, 361.0890; found, 361.0888.

### Deuterium labeling experiments

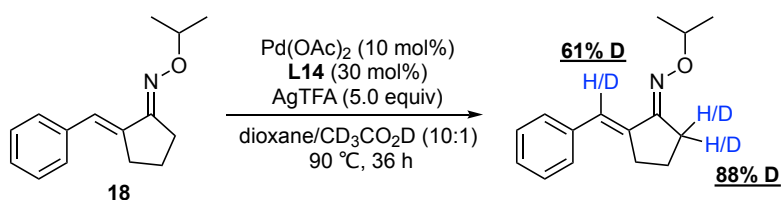

To a solution of  $\alpha,\beta$ -unsaturated oxime **18** (23 mg, 0.1 mmol, 1.0 eq.), AgTFA (0.5 mmol, 5.0 eq.), **L14** (30 mol%), and CD<sub>3</sub>CO<sub>2</sub>D (0.4 mL, 55 eq.) in dioxane (4.0 mL) was added Pd(OAc)<sub>2</sub> (0.01 mmol, 10 mol%). The reaction mixture was stirred at 90 °C (silicone oil bath) for 36 h, then diluted with AcOEt and filtered through a Celite<sup>®</sup> pad (rinsed with AcOEt). The filtrate was concentrated in *vacuo*, and the crude product was purified by flash column chromatography on NH<sub>2</sub> silica gel (hexane : AcOEt = 10 : 1) to afford the deuterated oxime (16.6 mg) as a pale yellow oil. The deuterium incorporation ratio was determined by <sup>1</sup>H NMR analysis of the isolated product.

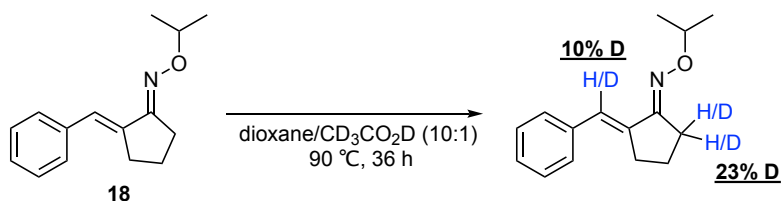

To a solution of  $\alpha,\beta$ -unsaturated oxime **18** (23 mg, 0.1 mmol, 1.0 eq.) in dioxane (4.0 mL) was added CD<sub>3</sub>CO<sub>2</sub>D (0.4 mL, 55 eq.). The reaction mixture was stirred at 90 °C (silicone oil bath) for 36 h, then diluted with AcOEt and filtered through a Celite<sup>®</sup> pad (rinsed with AcOEt). The filtrate was concentrated in *vacuo*, and the crude product was purified by flash column chromatography on NH<sub>2</sub> silica gel (hexane : AcOEt = 10 : 1) to afford the deuterated oxime (10.0 mg) as a pale yellow oil. The deuterium incorporation ratio was determined by <sup>1</sup>H NMR analysis of the isolated product.



## Kinetic isotope effect experiment

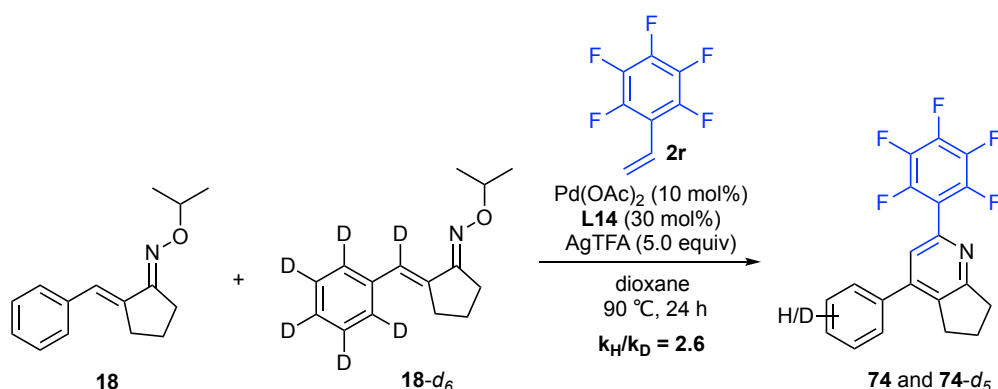

To a solution of  $\alpha,\beta$ -unsaturated oxime **18** (46 mg, 0.2 mmol, 1.0 eq.), **18-d<sub>6</sub>** (47 mg, 0.2 mmol, 1.0 eq.), pentafluorostyrene (**2r**, 0.6 mmol, 3.0 eq.), AgTFA (1.0 mmol, 5.0 eq.), and **L14** (0.06 mmol, 30 mol%) in dioxane (3.0 mL) was added Pd(OAc)<sub>2</sub> (0.02 mmol, 10 mol%). The reaction mixture was stirred at 90 °C (silicone oil bath) for 24 h, then diluted with AcOEt and filtered through a Celite<sup>®</sup> pad (rinsed with AcOEt). The filtrate was concentrated in *vacuo*, and the crude product was purified by flash column chromatography on NH<sub>2</sub> silica gel (hexane : AcOEt = 5 : 1). The obtained product mixture was analyzed by <sup>1</sup>H NMR analysis. The conversion of **74**,  $X_{74}$ , was determined by integration of the aromatic signals of **74**, which appeared as a multiplet (7.60–7.30 ppm). The total conversion,  $X_{total}$ , was determined by integration of the methylene signals of **74** and **74-d<sub>5</sub>**, which appeared as multiplet at the same chemical shift (3.25–3.09 ppm for both **74** and **74-d<sub>5</sub>**). Conversion of **74-d<sub>5</sub>**,  $X_{74-d_5}$ , could then be determined from the following formula:

$$X_{74-d_5} = X_{total} - X_{74}$$

$$k_H/k_D = X_{74} / X_{74-d_5} = 2.6/1 \text{ (the experiment was repeated two times)}$$

**Table S5.** Mechanistic studies on pyridine ring formation.<sup>1</sup>

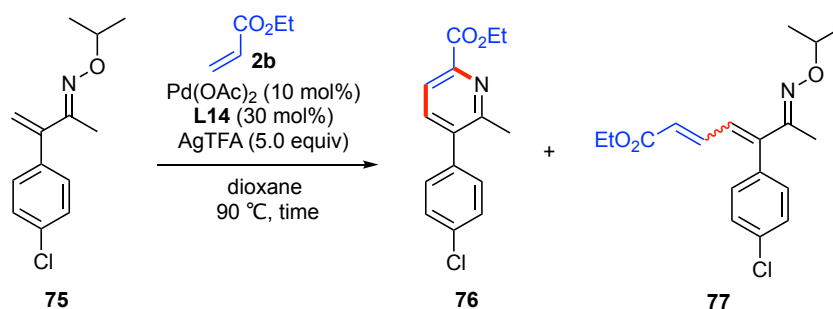

| entry | time | <b>76</b> | <b>77</b>               |
|-------|------|-----------|-------------------------|
| 1     | 4 h  | 0%        | 36% ( $E/Z = 1.3/1$ )   |
| 2     | 36 h | 28%       | 11% ( $E$ -isomer only) |

**Procedure for entry 1:** To a solution of  $\alpha,\beta$ -unsaturated oxime **75** (60 mg, 0.25 mmol, 1.0 eq.), ethyl acrylate (**2b**, 0.75 mmol, 3.0 eq.), AgTFA (1.25 mmol, 5.0 eq.), and **L14** (0.075 mmol, 30 mol%) in dioxane (3.0 mL) was added Pd(OAc)<sub>2</sub> (0.025 mmol, 10 mol%). The reaction mixture was stirred at 90 °C (silicone oil bath) for 4 h, then diluted with AcOEt and filtered through a Celite<sup>®</sup> pad (rinsed with AcOEt). The filtrate was concentrated in *vacuo*, and the crude product was purified by flash column chromatography on NH<sub>2</sub> silica gel (hexane : AcOEt = 10 : 1) to afford azatriene **77** (pale yellow oil, 30 mg, 36% yield) as a mixture of *E/Z* isomers (*E* : *Z* = 1.3 : 1).

**Procedure for entry 2:** To a solution of  $\alpha,\beta$ -unsaturated oxime **75** (95 mg, 0.4 mmol, 1.0 eq.), ethyl acrylate (**2b**, 1.2 mmol, 3.0 eq.), AgTFA (2.0 mmol, 5.0 eq.), and **L14** (0.12 mmol, 30 mol%) in dioxane (4.0 mL) was added Pd(OAc)<sub>2</sub> (0.04 mmol, 10 mol%). The reaction mixture was stirred at 90 °C (silicone oil bath) for 36 h, then diluted with AcOEt and filtered through a Celite<sup>®</sup> pad (rinsed with AcOEt). The filtrate was concentrated in *vacuo*, and the crude product was purified by flash column chromatography on NH<sub>2</sub> silica gel (hexane : AcOEt = 3 : 1) to afford **76** (colorless oil, 31 mg, 28% yield) and *E*-**77** (pale yellow oil, 15 mg, 11% yield).

### Pyridine ring formation from 1-azatriene<sup>1</sup>

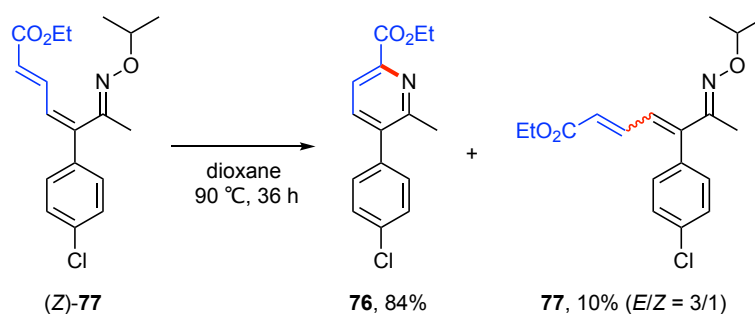

*Z*-isomer of **77** (15 mg, 0.045 mmol) was dissolved in dioxane (2 mL) and stirred at 90 °C for 36 h. The reaction mixture was cooled to room temperature and concentrated in *vacuo*. The resulting residue was purified by preparative TLC (silica gel, hexane : AcOEt = 4 : 1) to afford **76** (colorless oil, 10.4 mg, 84% yield) and **77** (pale yellow oil, 1.5 mg, 10% yield) as a mixture of *E/Z* isomers (*E* : *Z* = 3 : 1).

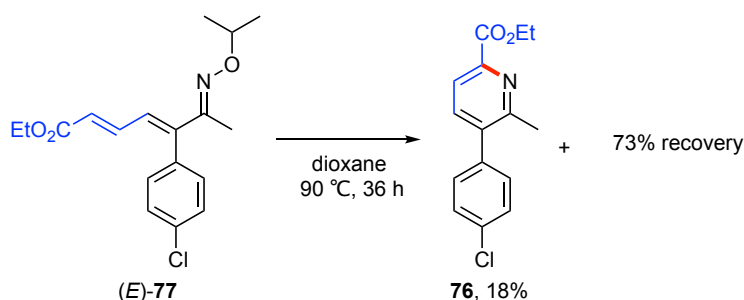

*E*-isomer of **77** (10 mg, 0.03 mmol) was dissolved in dioxane (1 mL) and stirred at 90 °C for 36 h. The reaction mixture was cooled to room temperature and concentrated in *vacuo*. The resulting residue was purified by preparative TLC (silica gel, hexane : AcOEt = 4 : 1) to afford **76** (colorless oil, 1.5 mg, 18% yield) and (*E*)-**77** (7.3 mg, 73% recovery).

## Preparation of ligands

Ligands **L1**, **L2**, **L3**, **L4**, **L5**, **L9**, **L12**, and **L13** were purchased from commercial sources and used without further purification. **L6**, **L7**, **L10**, **L11**, and **L14** were prepared as previously reported.<sup>1</sup> **L8** was synthesized according to the following procedures.

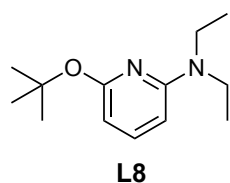

6-(*tert*-butoxy)-*N,N*-diethylpyridin-2-amine (**L8**): To a solution of 2-(*tert*-butoxy)-6-chloropyridine (100 mg, 0.54 mmol, 1.0 eq.), diethylamine (0.11 mL, 1.1 mmol, 2.0 eq.), RuPhos (25 mg, 0.054 mmol, 10 mol%), and Cs<sub>2</sub>CO<sub>3</sub> (528 mg, 1.6 mmol, 3.0 eq.) in toluene (3.0 mL) and *t*BuOH (0.3 mL) was added

Pd(OAc)<sub>2</sub> (12 mg, 0.054 mmol, 10 mol%). The reaction mixture was stirred at 100 °C (silicone oil bath) for 21 h, then diluted with AcOEt and filtered through a Celite<sup>®</sup> pad (rinsed with AcOEt). The filtrate was concentrated in *vacuo*, and the crude product was purified by flash column chromatography on silica gel (hexane : AcOEt = 20 : 1) to afford the title compound (95 mg, 80% yield) as a colorless oil. IR (KBr) 2974, 2929, 1589, 1573, 1490, 1434, 1397, 1360, 1297, 1247, 1179, 1156, 1078, 1046, 898, 775, 722 cm<sup>-1</sup>; <sup>1</sup>H NMR (CDCl<sub>3</sub>, 300 MHz) δ 7.28 (dd, 1H, *J* = 8.1, 7.8 Hz), 5.95 (d, 1H, *J* = 8.1 Hz), 5.87 (d, 1H, *J* = 7.8 Hz), 3.46 (q, 4H, *J* = 6.9 Hz), 1.57 (s, 9H), 1.16 (t, 6H, *J* = 6.9 Hz). <sup>13</sup>C {<sup>1</sup>H} NMR (CDCl<sub>3</sub>, 75 MHz) δ 163.0, 156.2, 139.3, 98.5, 96.3, 78.0, 42.4, 29.0, 13.1; HRMS (EI-quadrupole) *m/z*: [M]<sup>+</sup> Calcd for C<sub>13</sub>H<sub>22</sub>N<sub>2</sub>O, 222.1732; found, 222.1731.

## Preparation of substrates

All alkenes used in this work were purchased from commercial sources and used without further purification.

$\alpha,\beta$ -Unsaturated oximes except for **1f**, **1g**, **1h**, **1i**, **1j**, **1k**, **1l**, **1m**, **1n**, and **1o** were prepared as previously reported.<sup>1</sup>

$\alpha,\beta$ -Unsaturated oximes **1f**, **1g**, **1h**, **1i**, **1j**, **1k**, **1l**, **1m**, **1n**, and **1o** were synthesized according to the following procedures.

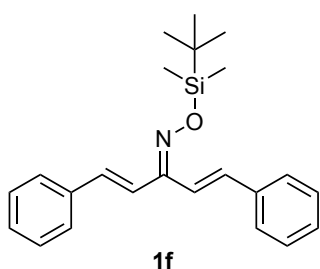

(*1E,4E*)-1,5-diphenylpenta-1,4-dien-3-one *O*-(*tert*-butyldimethylsilyl) oxime (**1f**): To a solution of (*1E,4E*)-1,5-diphenylpenta-1,4-dien-3-one oxime (200 mg, 0.80 mmol, 1.0 eq.) in CH<sub>2</sub>Cl<sub>2</sub> (3 mL) were added *tert*-butyldimethylchlorosilane (133 mg, 0.88 mmol, 1.1 eq.), DMAP (10 mg, 0.08 mmol, 0.1 eq.) and imidazole (109 mg, 1.60 mmol, 2.0 eq.). The reaction mixture was stirred at room temperature for 1.5 h, then quenched with saturated NH<sub>4</sub>Cl aq. The aqueous layer was extracted with CHCl<sub>3</sub> and the combined organic layers were washed with brine, dried over Na<sub>2</sub>SO<sub>4</sub>, filtered and concentrated in *vacuo*. The crude product was purified by flash column chromatography on silica gel (hexane : AcOEt = 20 : 1) to afford the title compound (233 mg, 80% yield) as a colorless oil. IR (KBr) 2928, 2856, 1448, 1251, 967, 835, 752, 691 cm<sup>-1</sup>; <sup>1</sup>H NMR (CDCl<sub>3</sub>, 300 MHz)  $\delta$  7.57–7.45 (m, 4H), 7.41–7.25 (m, 7H), 7.14 (d, 1H, *J* = 16.8 Hz), 7.09 (d, 1H, *J* = 16.8 Hz), 6.93 (d, 1H, *J* = 16.2 Hz), 1.00 (s, 9H), 0.26 (s, 6H). <sup>13</sup>C {<sup>1</sup>H} NMR (CDCl<sub>3</sub>, 75 MHz)  $\delta$  158.3, 136.7, 136.60, 136.56, 134.5, 128.82, 128.77, 128.6, 128.3, 127.2, 127.0, 122.8, 117.7, 26.2, 18.2, –5.13; HRMS (ESI-TOF) *m/z*: [M+H]<sup>+</sup> Calcd for C<sub>23</sub>H<sub>30</sub>NOSi, 364.2097; found, 364.2092.

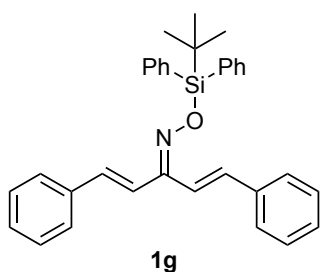

(*1E,4E*)-1,5-diphenylpenta-1,4-dien-3-one *O*-(*tert*-butyl-diphenylsilyl) oxime (**1g**): To a solution of (*1E,4E*)-1,5-diphenylpenta-1,4-dien-3-one oxime (100 mg, 0.40 mmol, 1.0 eq.) in THF (2 mL) were added NaH (63% dispersion in mineral oil, 24 mg, 0.60 mmol, 1.5 eq.) and *tert*-butyldiphenylchlorosilane (220 mg, 0.80 mmol, 2.0 eq.). The reaction mixture was stirred at room temperature overnight, then quenched with water. The aqueous layer was extracted with AcOEt and the combined organic layers were washed with brine, dried over Na<sub>2</sub>SO<sub>4</sub>, filtered and concentrated in *vacuo*. The crude product was purified by flash column chromatography on silica gel (hexane : AcOEt = 10 : 1) to afford the title compound (201 mg, quant.) as a colorless oil. IR (KBr) 3071, 2931, 2857, 1471, 1428, 1262, 1113, 969, 832,

754, 695, 610, 560, 505  $\text{cm}^{-1}$ ;  $^1\text{H}$  NMR ( $\text{CDCl}_3$ , 300 MHz)  $\delta$  7.80–7.75 (m, 4H), 7.65–7.56 (m, 3H), 7.50–7.22 (m, 14H), 7.18 (d, 1H,  $J = 16.8$  Hz), 7.10 (d, 1H,  $J = 16.8$  Hz), 6.92 (d, 1H,  $J = 16.2$  Hz), 1.16 (s, 9H).  $^{13}\text{C}\{^1\text{H}\}$  NMR ( $\text{CDCl}_3$ , 75 MHz)  $\delta$  159.0, 137.1, 136.6, 136.5, 135.5, 135.1, 133.6, 129.6, 129.0, 128.9, 128.7, 128.4, 127.6, 127.3, 127.0, 122.7, 117.6, 27.2, 19.5; HRMS (ESI-TOF)  $m/z$ :  $[\text{M}+\text{Na}]^+$  Calcd for  $\text{C}_{33}\text{H}_{33}\text{NNaOSi}$ , 510.2229; found, 510.2216.

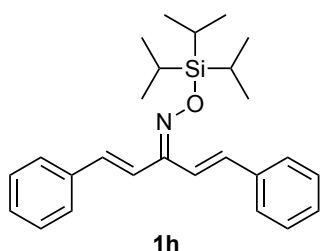

(*1E,4E*)-1,5-diphenylpenta-1,4-dien-3-one *O*-triisopropylsilyl oxime (**1h**): To a solution of (*1E,4E*)-1,5-diphenylpenta-1,4-dien-3-one oxime (200 mg, 0.80 mmol, 1.0 eq.) in  $\text{CH}_2\text{Cl}_2$  (3 mL) were added triisopropylsilyl chloride (170 mg, 0.88 mmol, 1.1 eq.), DMAP (10 mg, 0.08 mmol, 0.1 eq.) and imidazole (109 mg, 1.60 mmol, 2.0 eq.). The reaction mixture was stirred at room temperature for 1.5 h, then quenched with saturated  $\text{NH}_4\text{Cl}$  aq. The aqueous layer was extracted with  $\text{CHCl}_3$  and the combined organic layers were washed with brine, dried over  $\text{Na}_2\text{SO}_4$ , filtered and concentrated in *vacuo*. The crude product was purified by flash column chromatography on silica gel (hexane : AcOEt = 20 : 1) to afford the title compound (241 mg, 74% yield) as a pale yellow oil. IR (KBr) 3026, 2943, 2865, 1635, 1493, 1462, 1448, 1345, 1260, 1200, 967, 882, 826, 754, 690, 460  $\text{cm}^{-1}$ ;  $^1\text{H}$  NMR ( $\text{CDCl}_3$ , 300 MHz)  $\delta$  7.60–7.49 (m, 4H), 7.45–7.28 (m, 7H), 7.13 (d, 1H,  $J = 16.2$  Hz), 7.10 (d, 1H,  $J = 16.8$  Hz), 6.93 (d, 1H,  $J = 16.2$  Hz), 1.40–1.20 (m, 3H), 1.13 (d, 18H,  $J = 6.9$  Hz).  $^{13}\text{C}\{^1\text{H}\}$  NMR ( $\text{CDCl}_3$ , 75 MHz)  $\delta$  157.9, 136.8, 136.7, 136.2, 134.1, 128.8, 128.7, 128.2, 127.2, 126.9, 123.0, 117.7, 18.0, 11.9; HRMS (ESI-TOF)  $m/z$ :  $[\text{M}+\text{H}]^+$  Calcd for  $\text{C}_{26}\text{H}_{36}\text{NOSi}$ , 406.2566; found, 406.2560.

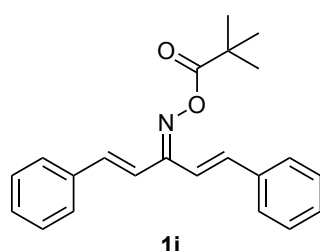

(*1E,4E*)-1,5-diphenylpenta-1,4-dien-3-one *O*-pivaloyl oxime (**1i**): To a solution of (*1E,4E*)-1,5-diphenylpenta-1,4-dien-3-one oxime (300 mg, 1.20 mmol, 1.0 eq.) in THF (6 mL) were added NaH (63% dispersion in mineral oil, 96 mg, 2.40 mmol, 2.0 eq.) and pivaloyl chloride (0.22 mL, 1.80 mmol, 1.5 eq.). The reaction mixture was stirred at room temperature for 30 min, then quenched with 1M NaOH aq. The aqueous layer was extracted with AcOEt and the combined organic layers were washed with brine, dried over  $\text{Na}_2\text{SO}_4$ , filtered and concentrated in *vacuo*. The crude product was purified by flash column chromatography on silica gel (hexane : AcOEt = 4 : 1) to afford the title compound (388 mg, 96% yield) as a pale yellow solid. mp 105–106  $^\circ\text{C}$ ; IR (KBr) 2973, 1754, 1636, 1577, 1478, 1448, 1343, 1273, 1202, 1105, 1026, 970, 923, 878, 755, 693  $\text{cm}^{-1}$ ;  $^1\text{H}$  NMR ( $\text{CDCl}_3$ , 300 MHz)  $\delta$  7.55–7.51 (m, 4H), 7.45–7.29 (m, 7H), 7.23 (d, 1H,  $J = 16.5$  Hz).

Hz), 7.19 (d, 1H,  $J = 16.5$  Hz), 7.03 (d, 1H,  $J = 16.2$  Hz), 1.34 (s, 9H).  $^{13}\text{C}\{^1\text{H}\}$  NMR ( $\text{CDCl}_3$ , 75 MHz)  $\delta$  174.9, 161.1, 139.8, 138.9, 135.8, 135.4, 129.7, 129.2, 129.0, 128.8, 127.4, 127.3, 120.9, 116.8, 38.9, 27.3; HRMS (EI-quadrupole)  $m/z$ :  $[\text{M}]^+$  Calcd for  $\text{C}_{22}\text{H}_{23}\text{NO}_2$ , 333.1729; found, 333.1716.

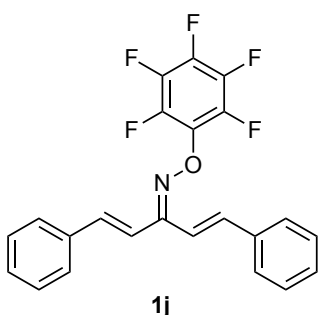

(1*E*,4*E*)-1,5-diphenylpenta-1,4-dien-3-one *O*-pentafluorophenyl oxime (**1j**): To a solution of (1*E*,4*E*)-1,5-diphenylpenta-1,4-dien-3-one oxime (100 mg, 0.40 mmol, 1.0 eq.) in DMF (3 mL) were added NaH (63% dispersion in mineral oil, 32 mg, 0.60 mmol, 1.5 eq.) and hexafluorobenzene (0.1 mL, 0.80 mmol, 2.0 eq.). The reaction mixture was stirred at room temperature for 1 h, then quenched with water. The aqueous layer was extracted with AcOEt and the combined organic layers

were washed with brine, dried over  $\text{Na}_2\text{SO}_4$ , filtered and concentrated in *vacuo*. The crude product was purified by flash column chromatography on silica gel (hexane : AcOEt = 10 : 1) to afford the title compound (133 mg, 80% yield) as a pale yellow solid. mp 103–104 °C; IR (KBr) 3027, 1634, 1577, 1515, 1465, 1448, 1344, 1201, 996, 969, 874, 854, 755, 691, 521  $\text{cm}^{-1}$ ;  $^1\text{H}$  NMR ( $\text{CDCl}_3$ , 300 MHz)  $\delta$  7.65–7.30 (m, 11H), 7.23 (d, 1H,  $J = 15.9$  Hz), 7.19 (d, 1H,  $J = 16.8$  Hz), 6.86 (d, 1H,  $J = 15.9$  Hz).  $^{13}\text{C}\{^1\text{H}\}$  NMR ( $\text{CDCl}_3$ , 75 MHz)  $\delta$  159.4, 140.0, 138.1, 135.8, 135.5, 129.8, 129.2, 128.9, 128.8, 127.7, 127.3, 119.6, 116.1; HRMS (EI-quadrupole)  $m/z$ :  $[\text{M}]^+$  Calcd for  $\text{C}_{23}\text{H}_{14}\text{F}_5\text{NO}$ , 415.0996; found, 415.0987.

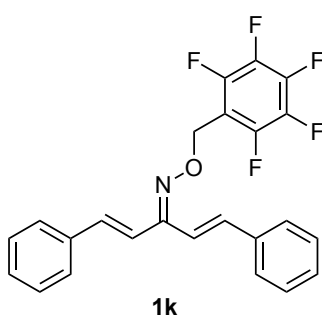

(1*E*,4*E*)-1,5-diphenylpenta-1,4-dien-3-one *O*-(pentafluorophenyl)methyl oxime (**1k**): To a solution of *O*-(pentafluorobenzyl)hydroxylamine hydrochloride (57 mg, 0.23 mmol, 1.1 eq.) and pyridine (42 mg, 0.53 mmol, 2.5 eq.) in MeOH (2 mL) was added *trans,trans*-dibenzalacetone (50 mg, 0.21 mmol, 1.0 eq.). The reaction mixture was stirred at room temperature overnight, then quenched with saturated  $\text{NH}_4\text{Cl}$  aq. The aqueous layer was extracted with AcOEt and the combined organic layers

were washed with brine, dried over  $\text{Na}_2\text{SO}_4$ , filtered and concentrated in *vacuo* to afford the title compound (89 mg, 99% yield) as a white solid. mp 122–123 °C; IR (KBr) 1655, 1521, 1506, 1448, 1305, 1127, 1025, 962, 941, 755, 692  $\text{cm}^{-1}$ ;  $^1\text{H}$  NMR ( $\text{CDCl}_3$ , 300 MHz)  $\delta$  7.53–7.46 (m, 4H), 7.44–7.30 (m, 6H), 7.19 (d, 1H,  $J = 16.8$  Hz), 7.12 (d, 1H,  $J = 16.2$  Hz), 7.04 (d, 1H,  $J = 16.8$  Hz), 6.83 (d, 1H,  $J = 16.2$  Hz), 5.30 (s, 2H).  $^{13}\text{C}\{^1\text{H}\}$  NMR ( $\text{CDCl}_3$ , 75 MHz)  $\delta$  155.2, 147.6 (m), 144.1 (m), 139.0 (m), 137.7, 136.3, 136.0, 135.5, 129.0, 128.8 (several signals overlapped.), 127.2, 127.0 (several signals overlapped.), 121.8, 117.0, 111.0 (m), 63.0; HRMS (EI-quadrupole)  $m/z$ :  $[\text{M}]^+$  Calcd for  $\text{C}_{24}\text{H}_{16}\text{F}_5\text{NO}$ , 429.1152; found, 429.1151.

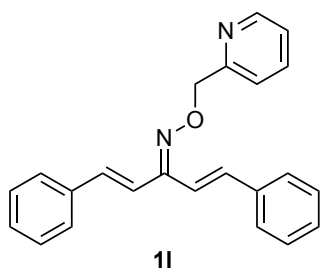

(*1E,4E*)-1,5-diphenylpenta-1,4-dien-3-one *O*-(pyridin-2-yl)methyl oxime (**1l**): To a solution of (*1E,4E*)-1,5-diphenylpenta-1,4-dien-3-one oxime (300 mg, 1.20 mmol, 1.0 eq.) in DMF (6 mL) were added NaH (63% dispersion in mineral oil, 120 mg, 3.0 mmol, 2.5 eq.) and 2-(bromomethyl)pyridine hydrobromide (364 mg, 1.4 mmol, 1.2 eq.). The reaction mixture was stirred at room temperature for 2.5 h, then quenched

with water. The aqueous layer was extracted with AcOEt and the combined organic layers were washed with brine, dried over Na<sub>2</sub>SO<sub>4</sub>, filtered and concentrated in *vacuo*. The crude product was purified by flash column chromatography on silica gel (hexane : AcOEt = 3 : 1) to afford the title compound (329 mg, 80% yield) as a pale yellow solid. mp 56–57 °C; IR (KBr) 3024, 1590, 1493, 1435, 1356, 1098, 1059, 969, 899, 754, 692 cm<sup>-1</sup>; <sup>1</sup>H NMR (CDCl<sub>3</sub>, 300 MHz) δ 8.60 (dd, 1H, *J* = 3.9, 1.8 Hz), 7.70 (ddd, 1H, *J* = 7.8, 7.8, 1.8 Hz), 7.57–7.26 (m, 12H), 7.23–7.18 (m, 1H), 7.13 (d, 1H, *J* = 16.2 Hz), 7.11 (d, 1H, *J* = 16.5 Hz), 6.89 (d, 1H, *J* = 16.2 Hz), 5.40 (s, 2H). <sup>13</sup>C{<sup>1</sup>H} NMR (CDCl<sub>3</sub>, 75 MHz) δ 158.3, 155.0, 149.2, 137.4, 136.6, 136.4, 136.2, 135.2, 129.0, 128.8, 128.7, 128.5, 127.3, 127.0, 122.4, 122.2, 121.7, 117.4, 77.0; HRMS (EI-quadrupole) *m/z*: [M]<sup>+</sup> Calcd for C<sub>23</sub>H<sub>20</sub>N<sub>2</sub>O, 340.1576; found, 340.1581.

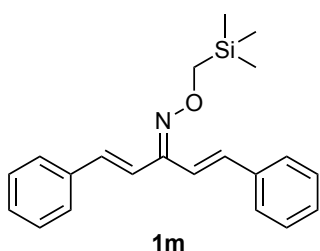

(*1E,4E*)-1,5-diphenylpenta-1,4-dien-3-one *O*-(trimethylsilyl)methyl oxime (**1m**): To a solution of (*1E,4E*)-1,5-diphenylpenta-1,4-dien-3-one oxime (150 mg, 0.60 mmol, 1.0 eq.) in THF (3 mL) were added NaH (63% dispersion in mineral oil, 36 mg, 0.90 mmol, 1.5 eq.) and chloromethyl trimethylsilane (0.17 mL, 1.20 mmol, 2.0 eq.). The reaction mixture was stirred at 70 °C (silicone oil bath) for 21 h, then quenched with water. The

aqueous layer was extracted with AcOEt and the combined organic layers were washed with brine, dried over Na<sub>2</sub>SO<sub>4</sub>, filtered and concentrated in *vacuo*. The crude product was purified by flash column chromatography on silica gel (hexane : AcOEt = 10 : 1) to afford the title compound (183 mg, 92% yield) as a pale yellow oil. IR (KBr) 2955, 1633, 1494, 1448, 1248, 1027, 968, 854, 754, 691 cm<sup>-1</sup>; <sup>1</sup>H NMR (CDCl<sub>3</sub>, 300 MHz) δ 7.55–7.45 (m, 4H), 7.39–7.22 (m, 7H), 7.12 (d, 1H, *J* = 16.2 Hz), 7.09 (d, 1H, *J* = 16.8 Hz), 6.87 (d, 1H, *J* = 16.2 Hz), 4.02 (s, 2H), 0.15 (s, 9H). <sup>13</sup>C{<sup>1</sup>H} NMR (CDCl<sub>3</sub>, 75 MHz) δ 153.6, 136.8, 136.7, 136.5, 134.3, 128.83, 128.78, 128.7, 128.3, 127.1, 126.9, 122.7, 117.4, 69.1, -2.68; HRMS (EI-quadrupole) *m/z*: [M]<sup>+</sup> Calcd for C<sub>21</sub>H<sub>25</sub>NOSi, 335.1705; found, 335.1703.

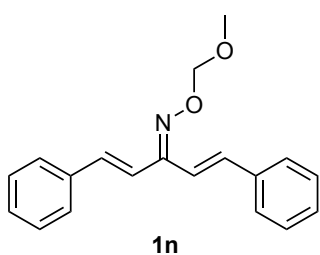

(1*E*,4*E*)-1,5-diphenylpenta-1,4-dien-3-one *O*-methoxymethyl oxime (**1n**): To a solution of (1*E*,4*E*)-1,5-diphenylpenta-1,4-dien-3-one oxime (200 mg, 0.80 mmol, 1.0 eq.) in DMF (3 mL) were added NaH (63% dispersion in mineral oil, 38 mg, 0.96 mmol, 1.2 eq.) and chloromethyl methyl ether (0.12 mL, 1.60 mmol, 2.0 eq.). The reaction mixture was stirred at room temperature for 1 h, then quenched with water. The

aqueous layer was extracted with AcOEt and the combined organic layers were washed with brine, dried over Na<sub>2</sub>SO<sub>4</sub>, filtered and concentrated in *vacuo*. The crude product was purified by flash column chromatography on silica gel (hexane : AcOEt = 5 : 1) to afford the title compound (162 mg, 69% yield) as a colorless oil. IR (KBr) 2933, 1634, 1576, 1494, 1448, 1392, 1345, 1209, 1154, 1086, 997, 970, 924, 896, 855, 755, 692 cm<sup>-1</sup>; <sup>1</sup>H NMR (CDCl<sub>3</sub>, 300 MHz) δ 7.60–7.49 (m, 4H), 7.40–7.29 (m, 7H), 7.17 (d, 1H, *J* = 16.2 Hz), 7.08 (d, 1H, *J* = 16.8 Hz), 6.92 (d, 1H, *J* = 16.2 Hz), 5.24 (s, 2H), 3.50 (s, 3H). <sup>13</sup>C{<sup>1</sup>H} NMR (CDCl<sub>3</sub>, 75 MHz) δ 155.7, 137.6, 136.4, 136.1, 135.6, 129.1, 128.8, 128.7, 128.5, 127.3, 127.0, 122.2, 117.4, 98.8, 56.4; HRMS (EI-quadrupole) *m/z*: [M]<sup>+</sup> Calcd for C<sub>19</sub>H<sub>19</sub>NO<sub>2</sub>, 293.1416; found, 293.1415.

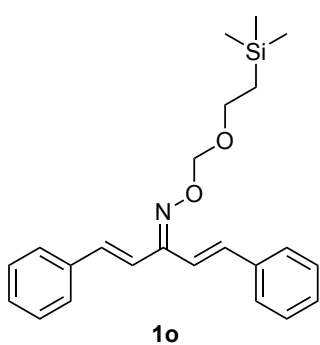

(1*E*,4*E*)-1,5-diphenylpenta-1,4-dien-3-one *O*-((2-(trimethylsilyl)ethoxy)methyl) oxime (**1o**): To a solution of (1*E*,4*E*)-1,5-diphenylpenta-1,4-dien-3-one oxime (200 mg, 0.80 mmol, 1.0 eq.) in DMF (4 mL) were added NaH (63% dispersion in mineral oil, 48 mg, 1.20 mmol, 1.5 eq.) and 2-(chloromethoxy)ethyltrimethylsilane (267 mg, 1.6 mmol, 2.0 eq.). The reaction mixture was stirred at room temperature for 1 h, then quenched with water. The aqueous layer was extracted with

AcOEt and the combined organic layers were washed with brine, dried over Na<sub>2</sub>SO<sub>4</sub>, filtered and concentrated in *vacuo*. The crude product was purified by flash column chromatography on silica gel (hexane : AcOEt = 20 : 1) to afford the title compound (260 mg, 85% yield) as a colorless oil. IR (KBr) 2952, 1448, 1248, 1104, 995, 857, 835, 754, 692 cm<sup>-1</sup>; <sup>1</sup>H NMR (CDCl<sub>3</sub>, 300 MHz) δ 7.55–7.45 (m, 4H), 7.39–7.24 (m, 7H), 7.14 (d, 1H, *J* = 16.2 Hz), 7.05 (d, 1H, *J* = 16.8 Hz), 6.90 (d, 1H, *J* = 16.2 Hz), 5.27 (s, 2H), 3.79–3.73 (m, 2H), 1.02–0.95 (m, 2H), 0.00 (s, 9H). <sup>13</sup>C{<sup>1</sup>H} NMR (CDCl<sub>3</sub>, 75 MHz) δ 155.3, 137.3, 136.4, 136.1, 135.4, 129.2, 128.9, 128.7, 128.5, 127.8, 127.5, 122.2, 117.5, 97.3, 66.4, 18.0, -1.44; HRMS (EI-quadrupole) *m/z*: [M]<sup>+</sup> Calcd for C<sub>23</sub>H<sub>29</sub>NO<sub>2</sub>Si, 379.1968; found, 379.1964.



## General procedure for the synthesis of *O*-isopropyl $\alpha,\beta$ -unsaturated oxime ethers<sup>1</sup>

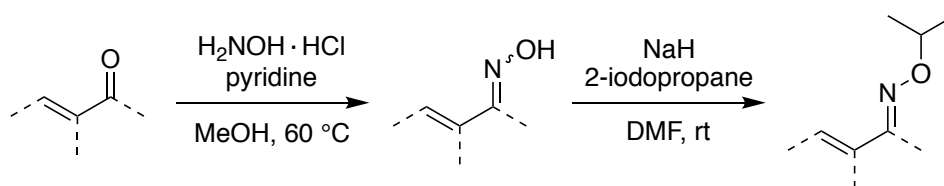

To a solution of  $\alpha,\beta$ -unsaturated ketone (1.0 eq.) in MeOH (0.5 M) were added hydroxylamine hydrochloride (1.5 eq.) and pyridine (2.0 eq.). The reaction mixture was stirred at 60 °C (silicone oil bath) for 1 h, then quenched with saturated  $\text{NH}_4\text{Cl}$ . The aqueous layer was extracted with AcOEt and the combined organic layers were washed with brine, dried over  $\text{Na}_2\text{SO}_4$ , filtered and concentrated in *vacuo*. The resulting residue was dissolved in DMF (0.3 M) and cooled to 0 °C. After the addition of NaH (63% dispersion in mineral oil, 2.0 eq.) and 2-iodopropane (1.3 eq.) at 0 °C, the reaction mixture was stirred at room temperature for 30 min, then quenched with water. The aqueous layer was extracted with AcOEt and the combined organic layers were washed with brine, dried over  $\text{Na}_2\text{SO}_4$ , filtered and concentrated in *vacuo*. The crude product was purified by flash column chromatography on silica gel to afford the desired *O*-isopropyl  $\alpha,\beta$ -unsaturated oxime ethers. *E*- and *Z*-isomers were easily separated by flash column chromatography and the configuration of oximes were determined by <sup>1</sup>H NMR analysis.

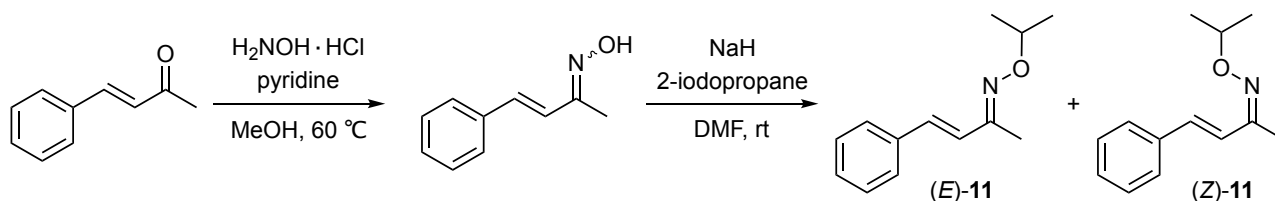

(*2Z,3E*)-4-phenylbut-3-en-2-one *O*-isopropyl oxime (**Z-11**): Following the general procedure for unsymmetrical  $\alpha,\beta$ -unsaturated oxime ether synthesis with (*E*)-4-phenylbut-3-en-2-one (1.0 g, 6.84 mmol), purification by flash column chromatography on silica gel (hexane :  $\text{CH}_2\text{Cl}_2$  = 3 : 1) afforded (*E*)-**11**<sup>1</sup> (colorless oil, 622 mg, 45% yield) and a small amount of (*Z*)-**11** (colorless oil, 200 mg, 14% yield). The configuration of oximes were determined by <sup>1</sup>H NMR analysis (The vinylene peak of *Z*-oxime was observed at a lower magnetic field than that of *E*-oxime.).

(*E*)-**11**: <sup>1</sup>H NMR ( $\text{CDCl}_3$ , 300 MHz)  $\delta$  7.50–7.44 (m, 2H), 7.37–7.25 (m, 3H), 6.90–6.75 (m, 2H), 4.39 (m, 1H), 2.07 (s, 3H), 1.29 (d, 6H,  $J$  = 6.3 Hz). <sup>13</sup>C{<sup>1</sup>H} NMR ( $\text{CDCl}_3$ , 75 MHz)  $\delta$  154.9, 136.7, 132.2, 128.7, 128.1, 126.7, 126.6, 75.7, 21.8, 10.3.

(*Z*)-**11**: IR (KBr) 2973, 2900, 1577, 1493, 1465, 1379, 1368, 1341, 1325, 1301, 1147, 1119, 991, 982, 956, 912, 874, 753, 694, 626, 616, 589, 516  $\text{cm}^{-1}$ ; <sup>1</sup>H NMR ( $\text{CDCl}_3$ , 300 MHz)  $\delta$  7.54–7.50 (m, 2H), 7.50 (d, 1H,  $J$  = 16.8 Hz), 7.40–7.30 (m, 3H), 6.89 (d, 1H,  $J$  = 16.8 Hz), 4.37 (m, 1H), 2.11 (s, 3H), 1.28 (d, 6H,  $J$  = 6.3 Hz). <sup>13</sup>C{<sup>1</sup>H} NMR ( $\text{CDCl}_3$ , 75 MHz)  $\delta$  151.6, 136.5, 135.5, 128.8, 128.7, 127.4,

117.9, 75.3, 21.7, 17.0; HRMS (EI-quadrupole)  $m/z$ :  $[M]^+$  Calcd for  $C_{13}H_{17}NO$ , 203.1310; found, 203.1307.

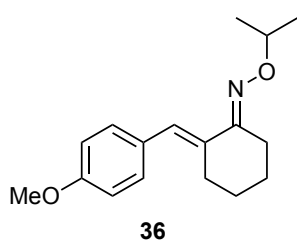

(*E*)-2-((*E*)-4-methoxybenzylidene)cyclohexan-1-one *O*-isopropyl oxime (**36**): Following the general procedure for the synthesis of *O*-isopropyl  $\alpha,\beta$ -unsaturated oxime ethers with (*E*)-2-((*E*)-4-methoxybenzylidene)cyclohexan-1-one oxime (1.10 g, 5.09 mmol), purification by flash column chromatography on silica gel (hexane : AcOEt

= 10 : 1) afforded the title compound (white solid, 1.13 g, 81% yield). mp 76–77 °C; IR (KBr) 2971, 2933, 2835, 1605, 1509, 1463, 1367, 1301, 1250, 1177, 1146, 1122, 1035, 969, 889, 835, 749, 531  $cm^{-1}$ ;  $^1H$  NMR ( $CDCl_3$ , 300 MHz)  $\delta$  7.26 (d, 2H,  $J = 8.4$  Hz), 6.88 (s, 1H), 6.86 (d, 2H,  $J = 8.4$  Hz), 4.45–4.35 (m, 1H), 3.81 (s, 3H), 2.70–2.60 (m, 2H), 2.59–2.56 (m, 2H), 1.70–1.58 (m, 4H), 1.29 (d, 6H,  $J = 6.0$  Hz).  $^{13}C\{^1H\}$  NMR ( $CDCl_3$ , 75 MHz)  $\delta$  159.0, 158.5, 133.5, 131.1, 129.8, 126.6, 113.4, 75.1, 55.2, 29.0, 25.8, 24.9, 23.3, 21.9; HRMS (EI-quadrupole)  $m/z$ :  $[M]^+$  Calcd for  $C_{17}H_{23}NO_2$ , 273.1729; found, 273.1728.

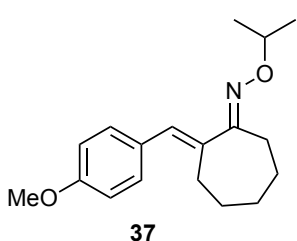

(*1E*)-2-(4-methoxybenzylidene)cycloheptan-1-one *O*-isopropyl oxime (**37**): Following the general procedure for the synthesis of *O*-isopropyl  $\alpha,\beta$ -unsaturated oxime ethers with (*E*)-2-((*E*)-4-methoxybenzylidene)cycloheptan-1-one oxime (1.31 g, 5.69 mmol), purification by flash column chromatography on silica gel (hexane : AcOEt

= 30 : 1) afforded the title compound (colorless oil, 916 mg, 56% yield). IR (KBr) 2971, 2928, 2854, 1606, 1573, 1509, 1455, 1368, 1301, 1251, 1176, 1150, 1123, 1035, 969, 888, 828, 750, 532  $cm^{-1}$ ;  $^1H$  NMR ( $CDCl_3$ , 300 MHz)  $\delta$  7.30 (d, 2H,  $J = 8.4$  Hz), 6.87 (d, 2H,  $J = 8.4$  Hz), 6.67 (s, 1H), 4.45–4.38 (m, 1H), 3.81 (s, 3H), 2.64–2.56 (m, 4H), 1.70–1.65 (m, 6H), 1.27 (d, 6H,  $J = 6.0$  Hz).  $^{13}C\{^1H\}$  NMR ( $CDCl_3$ , 75 MHz)  $\delta$  163.9, 158.4, 138.0, 130.4, 129.9, 127.3, 113.5, 74.9, 55.2, 30.5, 30.0, 28.1, 27.7, 24.9, 21.9; HRMS (EI-quadrupole)  $m/z$ :  $[M]^+$  Calcd for  $C_{18}H_{25}NO_2$ , 287.1885; found, 287.1886.

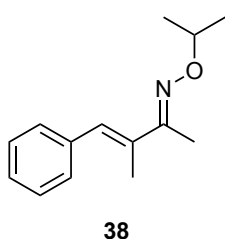

(*2E,3E*)-3-methyl-4-phenylbut-3-en-2-one *O*-isopropyl oxime (**38**): Following the general procedure for the synthesis of *O*-isopropyl  $\alpha,\beta$ -unsaturated oxime ethers with (*2E,3E*)-3-methyl-4-phenylbut-3-en-2-one oxime (200 mg, 1.25 mmol), purification by flash column chromatography on silica gel (hexane : AcOEt = 30 : 1) afforded the title compound (colorless oil, 230 mg, 85% yield).

IR (KBr) 2973, 1440, 1370, 1324, 1276, 1150, 1124, 1019, 975, 915, 857, 742, 698, 579, 506  $cm^{-1}$ ;  $^1H$  NMR ( $CDCl_3$ , 300 MHz)  $\delta$  7.40–7.24 (m, 5H), 6.83 (s, 1H), 4.44–4.35 (m, 1H), 2.10 (s, 3H), 2.09 (s, 3H), 1.28 (d, 6H,  $J = 6.3$  Hz).  $^{13}C\{^1H\}$  NMR ( $CDCl_3$ , 75 MHz)  $\delta$  155.9, 137.6, 135.6, 129.6, 129.3,

128.1, 126.8, 75.4, 21.7, 14.2, 10.9; HRMS (EI-quadrupole)  $m/z$ :  $[M]^+$  Calcd for  $C_{14}H_{19}NO$ , 217.1467; found, 217.1468.

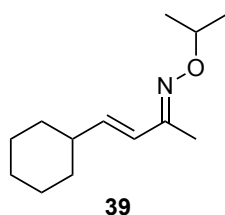

(*2E,3E*)-4-cyclohexylbut-3-en-2-one *O*-isopropyl oxime (**39**): Following the general procedure for the synthesis of *O*-isopropyl  $\alpha,\beta$ -unsaturated oxime ethers with (*2E,3E*)-4-cyclohexylbut-3-en-2-one oxime (500 mg, 3.28 mmol), purification by flash column chromatography on silica gel (hexane :  $CH_2Cl_2$  = 4 : 1) afforded the title compound (colorless oil, 326 mg, 48% yield). IR (KBr)

2973, 2925, 2852, 1448, 1369, 1323, 1150, 1123, 965, 750, 581  $cm^{-1}$ ;  $^1H$  NMR ( $CDCl_3$ , 300 MHz)  $\delta$  6.10 (dd, 1H,  $J$  = 16.2, 1.8 Hz), 5.95 (dd, 1H,  $J$  = 16.2, 6.6 Hz), 4.36–4.27 (m, 1H), 2.15–2.00 (m, 1H), 1.92 (s, 3H), 1.80–1.60 (m, 5H), 1.40–1.10 (m, 5H), 1.24 (d, 6H,  $J$  = 6.3 Hz).  $^{13}C\{^1H\}$  NMR ( $CDCl_3$ , 75 MHz)  $\delta$  155.0, 140.8, 125.5, 75.2, 40.9, 32.6, 26.1, 25.9, 21.7, 10.2; HRMS (EI-quadrupole)  $m/z$ :  $[M]^+$  Calcd for  $C_{13}H_{23}NO$ , 209.1780; found, 209.1779.

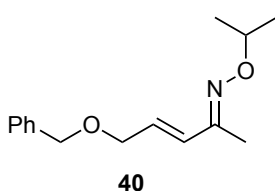

(*2E,3E*)-5-(benzyloxy)pent-3-en-2-one *O*-isopropyl oxime (**40**): Following the general procedure for the synthesis of *O*-isopropyl  $\alpha,\beta$ -unsaturated oxime ethers with (*2E,3E*)-5-(benzyloxy)pent-3-en-2-one oxime (1.05 g, 5.52 mmol), purification by flash column chromatography on silica gel (hexane :

AcOEt = 30 : 1) afforded the title compound (pale yellow oil, 461 mg, 34% yield). IR (KBr) 2974, 1455, 1369, 1274, 1120, 970, 749, 698  $cm^{-1}$ ;  $^1H$  NMR ( $CDCl_3$ , 300 MHz)  $\delta$  7.40–7.28 (m, 5H), 6.37 (dd, 1H,  $J$  = 16.2, 1.5 Hz), 6.09 (td, 1H,  $J$  = 16.2, 6.0 Hz), 4.53 (s, 3H), 4.36–4.30 (m, 1H), 4.14 (dd, 1H,  $J$  = 6.0, 1.5 Hz), 1.95 (s, 3H), 1.25 (d, 6H,  $J$  = 6.0 Hz).  $^{13}C\{^1H\}$  NMR ( $CDCl_3$ , 75 MHz)  $\delta$  154.0, 138.1, 130.4, 130.0, 128.4, 127.7, 127.6, 75.5, 72.3, 70.3, 21.7, 10.2; HRMS (EI-quadrupole)  $m/z$ :  $[M]^+$  Calcd for  $C_{15}H_{21}NO_2$ , 247.1572; found, 247.1577.

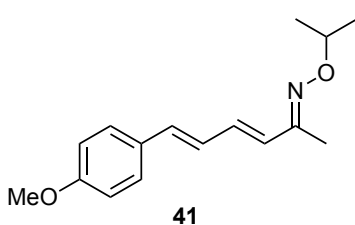

(*2E,3E,5E*)-6-(4-methoxyphenyl)hexa-3,5-dien-2-one *O*-isopropyl oxime (**41**): Following the general procedure for the synthesis of *O*-isopropyl  $\alpha,\beta$ -unsaturated oxime ethers with (*2E,3E,5E*)-6-(4-methoxyphenyl)hexa-3,5-dien-2-one oxime (1.08 g, 5.33 mmol), purification by flash column chromatography on silica gel (hexane :

AcOEt = 10 : 1) afforded the title compound (pale yellow solid, 605 mg, 44% yield). mp 85–86  $^{\circ}C$ ; IR (KBr) 2968, 2927, 1599, 1511, 1457, 1367, 1257, 1151, 1120, 1027, 990, 971, 840, 818, 806, 749, 539, 516  $cm^{-1}$ ;  $^1H$  NMR ( $CDCl_3$ , 300 MHz)  $\delta$  7.36 (d, 2H,  $J$  = 8.7 Hz), 6.86 (d, 2H,  $J$  = 8.7 Hz), 6.80–6.58 (m, 3H), 6.36 (d, 1H,  $J$  = 15.6 Hz), 4.39–4.30 (m, 1H), 3.81 (s, 3H), 2.00 (s, 3H), 1.27 (d, 6H,  $J$  = 6.3 Hz).  $^{13}C\{^1H\}$  NMR ( $CDCl_3$ , 75 MHz)  $\delta$  159.5, 155.0, 133.8, 133.0, 129.8, 129.3, 127.8, 126.7,

114.1, 75.6, 55.3, 21.7, 10.3; HRMS (EI-quadrupole)  $m/z$ :  $[M]^+$  Calcd for  $C_{16}H_{21}NO_2$ , 259.1572; found, 259.1575.

## Pd-catalyzed substituted pyridine synthesis<sup>1</sup>

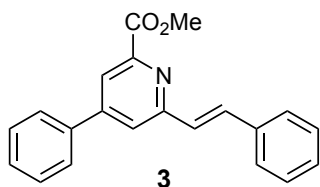

methyl (*E*)-4-phenyl-6-styrylpicolinate (**3**): Following the general procedure A for pyridine synthesis with  $\alpha,\beta$ -unsaturated oxime **1b** (50 mg, 0.17 mmol) and methyl acrylate (**2a**), purification by flash column chromatography (hexane : AcOEt = 5 : 1) afforded the title compound (white solid, 46 mg, 85% yield). <sup>1</sup>H NMR (CDCl<sub>3</sub>, 300 MHz)  $\delta$  8.23 (d, 1H,  $J$  = 1.5 Hz), 7.85 (d, 1H,  $J$  = 1.5 Hz), 7.76–7.69 (m, 2H), 7.67–7.58 (m, 3H), 7.57–7.45 (m, 3H), 7.44–7.28 (m, 4H), 4.06 (s, 3H). <sup>13</sup>C{<sup>1</sup>H} NMR (CDCl<sub>3</sub>, 75 MHz)  $\delta$  166.0, 156.8, 150.1, 148.4, 137.4, 136.3, 134.3, 129.5, 129.2, 128.8, 128.6, 127.6, 127.3, 127.1, 122.1, 121.5, 53.0; HRMS (EI-quadrupole)  $m/z$ :  $[M]^+$  Calcd for  $C_{21}H_{17}NO_2$ , 315.1259; found, 315.1247.

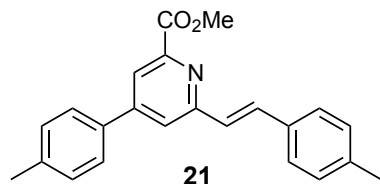

methyl (*E*)-6-(4-methylstyryl)-4-(*p*-tolyl)picolinate (**21**): Following the general procedure A for pyridine synthesis with  $\alpha,\beta$ -unsaturated oxime **6** (64 mg, 0.20 mmol) and methyl acrylate (**2a**), purification by flash column chromatography (hexane : AcOEt = 4 : 1) afforded the title compound (white solid, 63 mg, 91% yield). <sup>1</sup>H NMR (CDCl<sub>3</sub>, 300 MHz)  $\delta$  8.20 (d, 1H,  $J$  = 1.8 Hz), 7.82 (d, 1H,  $J$  = 1.8 Hz), 7.70–7.61 (m, 3H), 7.52 (d, 2H,  $J$  = 8.1 Hz), 7.35–7.27 (m, 3H), 7.20 (d, 2H,  $J$  = 7.8 Hz), 4.05 (s, 3H), 2.43 (s, 3H), 2.37 (s, 3H). <sup>13</sup>C{<sup>1</sup>H} NMR (CDCl<sub>3</sub>, 75 MHz)  $\delta$  166.1, 156.9, 149.9, 148.4, 139.7, 138.7, 134.5, 134.1, 133.6, 129.9, 129.5, 127.2, 126.9, 126.8, 121.7, 121.1, 53.0, 21.3, 21.2; HRMS (EI-quadrupole)  $m/z$ :  $[M]^+$  Calcd for  $C_{23}H_{21}NO_2$ , 343.1572; found, 343.1559.

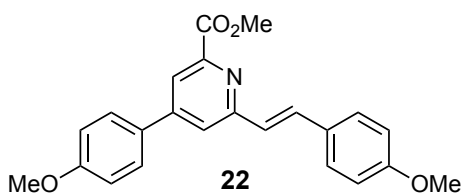

methyl (*E*)-4-(4-methoxyphenyl)-6-(4-methoxystyryl)picolinate (**22**): Following the general procedure A for pyridine synthesis with  $\alpha,\beta$ -unsaturated oxime **7** (70 mg, 0.20 mmol) and methyl acrylate (**2a**), purification by flash column chromatography (hexane : AcOEt = 3 : 1) afforded the title compound (pale yellow solid, 64 mg, 85% yield).  $^1\text{H}$  NMR ( $\text{CDCl}_3$ , 300 MHz)  $\delta$  8.17 (d, 1H,  $J$  = 1.8 Hz), 7.77 (d, 1H,  $J$  = 1.8 Hz), 7.69 (d, 2H,  $J$  = 8.7 Hz), 7.63 (d, 1H,  $J$  = 16.5 Hz), 7.56 (d, 2H,  $J$  = 8.7 Hz), 7.21 (d, 1H,  $J$  = 16.5 Hz), 7.04 (d, 2H,  $J$  = 8.7 Hz), 6.93 (d, 2H,  $J$  = 8.7 Hz), 4.05 (s, 3H), 3.88 (s, 3H), 3.84 (s, 3H).  $^{13}\text{C}\{^1\text{H}\}$  NMR ( $\text{CDCl}_3$ , 75 MHz)  $\delta$  166.2, 160.8, 160.1, 157.1, 149.4, 148.3, 133.7, 129.7, 129.1, 128.6, 128.3, 125.6, 121.2, 120.6, 114.6, 114.2, 55.4, 55.3, 53.0; HRMS (EI-quadrupole)  $m/z$ :  $[\text{M}]^+$  Calcd for  $\text{C}_{23}\text{H}_{21}\text{NO}_4$ , 375.1471; found, 375.1467.

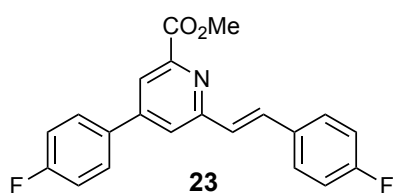

methyl (*E*)-4-(4-fluorophenyl)-6-(4-fluorostyryl)picolinate (**23**): Following the general procedure A for pyridine synthesis with  $\alpha,\beta$ -unsaturated oxime **8** (65 mg, 0.20 mmol) and methyl acrylate (**2a**), purification by flash column chromatography (hexane : AcOEt = 3 : 1) afforded the title compound (pale yellow oil, 45 mg, 65% yield).  $^1\text{H}$  NMR ( $\text{CDCl}_3$ , 300 MHz)  $\delta$  8.18 (d, 1H,  $J$  = 1.5 Hz), 7.77 (d, 1H,  $J$  = 1.5 Hz), 7.74–7.63 (m, 3H), 7.61–7.55 (m, 2H), 7.28–7.18 (m, 3H), 7.13–7.05 (m, 2H), 4.06 (s, 3H).  $^{13}\text{C}\{^1\text{H}\}$  NMR ( $\text{CDCl}_3$ , 75 MHz)  $\delta$  165.9, 165.4, 164.6, 162.0, 161.3, 156.7, 149.1, 148.6, 133.5, 133.3, 132.5, 132.4, 129.0, 128.9, 128.8, 127.2, 122.0, 121.3, 116.5, 116.2, 116.0, 115.7, 53.1; HRMS (EI-quadrupole)  $m/z$ :  $[\text{M}]^+$  Calcd for  $\text{C}_{21}\text{H}_{15}\text{F}_2\text{NO}_2$ , 351.1071; found, 351.1058.

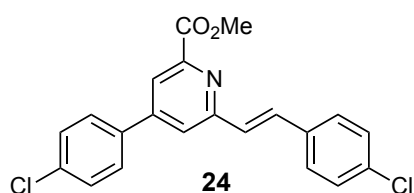

methyl (*E*)-4-(4-chlorophenyl)-6-(4-chlorostyryl)picolinate (**24**): Following the general procedure A for pyridine synthesis with  $\alpha,\beta$ -unsaturated oxime **9** (43 mg, 0.12 mmol) and methyl acrylate (**2a**), purification by flash column chromatography (hexane : AcOEt = 3 : 1) afforded the title compound (pale yellow solid, 33 mg, 70% yield).  $^1\text{H}$  NMR ( $\text{CDCl}_3$ , 300 MHz)  $\delta$  8.19 (d, 1H,  $J$  = 1.5 Hz), 7.77 (d, 1H,  $J$  = 1.5 Hz), 7.71–7.63 (m, 3H), 7.57–7.48 (m, 4H), 7.36 (d, 2H,  $J$  = 8.4 Hz), 7.30 (d, 1H,  $J$  = 16.2 Hz), 4.06 (s, 3H).  $^{13}\text{C}\{^1\text{H}\}$  NMR ( $\text{CDCl}_3$ , 75 MHz)  $\delta$  165.8, 156.6, 149.0, 148.7, 135.9, 135.8, 134.7, 134.5, 133.2, 129.5, 129.0, 128.4, 128.3, 127.9, 122.1, 121.3, 53.1; HRMS (EI-quadrupole)  $m/z$ :  $[\text{M}]^+$  Calcd for  $\text{C}_{21}\text{H}_{15}\text{Cl}_2\text{NO}_2$ , 383.0480; found, 383.0487.

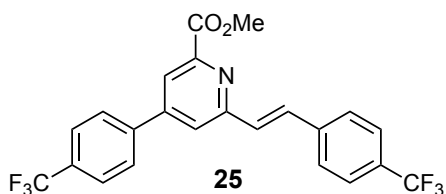

methyl (*E*)-4-(4-(trifluoromethyl)phenyl)-6-(4-(trifluoromethyl)styryl)picolinate (**25**): Following the general procedure A for pyridine synthesis with  $\alpha,\beta$ -unsaturated oxime **10** (43 mg, 0.10 mmol) and methyl acrylate (**2a**), purification by flash column chromatography (hexane : AcOEt = 3 : 1) afforded the title compound (pale yellow solid, 30 mg, 66% yield).  $^1\text{H}$  NMR ( $\text{CDCl}_3$ , 300 MHz)  $\delta$  8.26 (d, 1H,  $J = 1.8$  Hz), 7.85–7.63 (m, 10H), 7.42 (d, 1H,  $J = 16.2$  Hz), 4.08 (s, 3H).  $^{13}\text{C}\{^1\text{H}\}$  NMR ( $\text{CDCl}_3$ , 75 MHz)  $\delta$  165.6, 156.3, 148.9, 140.8, 139.6, 133.2, 131.8, 131.4, 130.6, 130.2, 129.5, 127.6, 127.4, 126.3, 126.2, 125.8, 122.8, 122.0, 53.2; HRMS (EI-quadrupole)  $m/z$ :  $[\text{M}]^+$  Calcd for  $\text{C}_{23}\text{H}_{15}\text{F}_6\text{NO}_2$ , 451.1007; found, 451.1020.

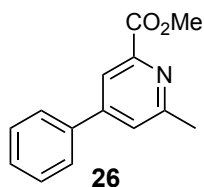

methyl 6-methyl-4-phenylpicolinate (**26**): Following the general procedure A for pyridine synthesis with  $\alpha,\beta$ -unsaturated oxime **11** (41 mg, 0.20 mmol) and methyl acrylate (**2a**), purification by flash column chromatography (hexane : AcOEt = 3 : 1) afforded the title compound (pale yellow oil, 31 mg, 68% yield).  $^1\text{H}$  NMR ( $\text{CDCl}_3$ , 300 MHz)  $\delta$  8.21 (d, 1H,  $J = 1.2$  Hz), 7.68 (dd, 2H,  $J = 9.0, 1.5$  Hz), 7.58–7.40 (m, 4H), 4.03 (s, 3H), 2.73 (s, 3H).  $^{13}\text{C}\{^1\text{H}\}$  NMR ( $\text{CDCl}_3$ , 75 MHz)  $\delta$  166.1, 159.5, 149.7, 148.0, 137.3, 129.4, 129.1, 127.0, 124.5, 120.6, 53.0, 24.7; HRMS (EI-quadrupole)  $m/z$ :  $[\text{M}]^+$  Calcd for  $\text{C}_{14}\text{H}_{13}\text{NO}_2$ , 227.0946; found, 227.0951.

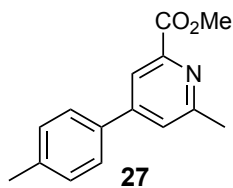

methyl 6-methyl-4-(*p*-tolyl)picolinate (**27**): Following the general procedure A for pyridine synthesis with  $\alpha,\beta$ -unsaturated oxime **12** (43 mg, 0.20 mmol) and methyl acrylate (**2a**), purification by flash column chromatography (hexane : AcOEt = 3 : 1) afforded the title compound (pale yellow solid, 39 mg, 80% yield).  $^1\text{H}$  NMR ( $\text{CDCl}_3$ , 300 MHz)  $\delta$  8.20 (d, 1H,  $J = 1.8$  Hz), 7.59 (d, 2H,  $J = 8.1$  Hz), 7.55 (d, 1H,  $J = 1.8$  Hz), 7.30 (d, 2H,  $J = 8.1$  Hz), 4.03 (s, 3H), 2.71 (s, 3H), 2.42 (s, 3H).  $^{13}\text{C}\{^1\text{H}\}$  NMR ( $\text{CDCl}_3$ , 75 MHz)  $\delta$  166.1, 159.4, 149.6, 148.0, 139.6, 134.4, 129.9, 126.8, 124.2, 120.4, 52.9, 24.7, 21.2; HRMS (EI-quadrupole)  $m/z$ :  $[\text{M}]^+$  Calcd for  $\text{C}_{15}\text{H}_{15}\text{NO}_2$ , 241.1103; found, 241.1096.

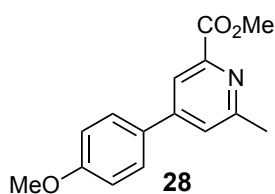

methyl 4-(4-methoxyphenyl)-6-methylpicolinate (**28**): Following the general procedure A for pyridine synthesis with  $\alpha,\beta$ -unsaturated oxime **13** (41 mg, 0.20 mmol) and methyl acrylate (**2a**), purification by flash column chromatography (hexane : AcOEt = 2 : 1) afforded the title compound (pale yellow solid, 39 mg, 75% yield).  $^1\text{H}$  NMR ( $\text{CDCl}_3$ , 300 MHz)  $\delta$  8.17 (d, 1H,  $J = 1.2$  Hz), 7.64 (d, 2H,  $J = 8.7$  Hz), 7.52 (d, 1H,  $J = 1.2$  Hz), 7.02 (d, 2H,  $J = 8.7$  Hz), 4.03 (s, 3H), 3.87 (s, 3H), 2.70 (s, 3H).  $^{13}\text{C}\{^1\text{H}\}$  NMR ( $\text{CDCl}_3$ , 75 MHz)  $\delta$  166.2, 160.7, 159.3, 149.1, 147.9, 129.5, 128.2, 123.7, 120.0, 114.5, 55.3, 52.9, 24.7; HRMS (EI-quadrupole)  $m/z$ :  $[\text{M}]^+$  Calcd for  $\text{C}_{15}\text{H}_{15}\text{NO}_3$ , 257.1052; found, 257.1057.

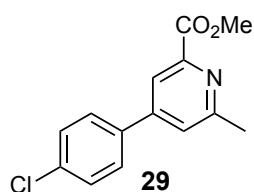

methyl 4-(4-chlorophenyl)-6-methylpicolinate (**29**): Following the general procedure A for pyridine synthesis with  $\alpha,\beta$ -unsaturated oxime **14** (48 mg, 0.20 mmol) and methyl acrylate (**2a**), purification by flash column chromatography (hexane : AcOEt = 1 : 1) afforded the title compound (white solid, 34 mg, 64% yield).  $^1\text{H}$  NMR ( $\text{CDCl}_3$ , 300 MHz)  $\delta$  8.17 (d, 1H,  $J = 1.2$  Hz), 7.62 (d, 2H,  $J = 8.7$  Hz), 7.53 (d, 1H,  $J = 1.2$  Hz), 7.48 (d, 2H,  $J = 8.7$  Hz), 4.03 (s, 3H), 2.73 (s, 3H).  $^{13}\text{C}\{^1\text{H}\}$  NMR ( $\text{CDCl}_3$ , 75 MHz)  $\delta$  165.9, 159.7, 148.5, 148.2, 135.8, 135.7, 129.4, 128.3, 124.2, 120.4, 53.0, 24.7; HRMS (EI-quadrupole)  $m/z$ :  $[\text{M}]^+$  Calcd for  $\text{C}_{14}\text{H}_{12}\text{ClNO}_2$ , 261.0557, 263.0527; found, 261.0562, 263.0522.

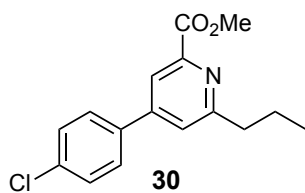

methyl 4-(4-chlorophenyl)-6-propylpicolinate (**30**): Following the general procedure A for pyridine synthesis with  $\alpha,\beta$ -unsaturated oxime **15** (53 mg, 0.20 mmol) and methyl acrylate (**2a**), purification by flash column chromatography (hexane : AcOEt = 10 : 1) afforded the title compound (white solid, 37 mg, 64% yield).  $^1\text{H}$  NMR ( $\text{CDCl}_3$ , 300 MHz)  $\delta$  8.17 (d, 1H,  $J = 1.2$  Hz), 7.62 (d, 2H,  $J = 8.7$  Hz), 7.51 (d, 1H,  $J = 1.2$  Hz), 7.48 (d, 2H,  $J = 8.7$  Hz), 4.03 (s, 3H), 2.94 (t, 2H,  $J = 8.1$  Hz), 1.87–1.78 (m, 2H), 1.02 (t, 3H,  $J = 7.5$  Hz).  $^{13}\text{C}\{^1\text{H}\}$  NMR ( $\text{CDCl}_3$ , 75 MHz)  $\delta$  166.1, 163.7, 148.4, 148.3,

136.0, 135.7, 129.4, 128.3, 123.5, 120.6, 53.0, 40.5, 23.4, 13.9; HRMS (EI-quadrupole)  $m/z$ :  $[M]^+$  Calcd for  $C_{16}H_{16}ClNO_2$ , 289.0870; found, 289.0871.

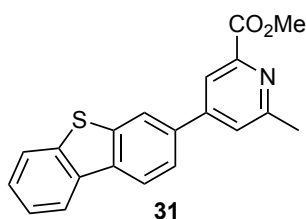

methyl 4-(dibenzo[*b,d*]thiophen-3-yl)-6-methylpicolinate (**31**): Following the general procedure A for pyridine synthesis with  $\alpha,\beta$ -unsaturated oxime **16** (62 mg, 0.20 mmol) and methyl acrylate (**2a**), purification by flash column chromatography (hexane : AcOEt = 2 : 1) afforded the title compound (pale yellow solid, 32 mg, 48% yield).  $^1H$  NMR ( $CDCl_3$ , 300 MHz)  $\delta$  8.42 (d, 1H,  $J = 1.5$  Hz), 8.32 (d, 1H,  $J = 1.5$  Hz), 8.29–8.22 (m, 1H), 7.96 (d, 1H,  $J = 8.4$  Hz), 7.92–7.85 (m, 1H), 7.75 (dd, 1H,  $J = 8.4, 1.8$  Hz), 7.67 (d, 1H,  $J = 1.8$  Hz), 7.55–7.47 (m, 2H), 4.06 (s, 3H), 2.77 (s, 3H).  $^{13}C\{^1H\}$  NMR ( $CDCl_3$ , 75 MHz)  $\delta$  166.1, 159.6, 149.7, 148.1, 140.7, 139.9, 136.3, 135.1, 133.8, 127.3, 125.4, 124.7, 124.6, 123.5, 123.0, 121.7, 120.7, 120.0, 53.0, 24.8; HRMS (EI-quadrupole)  $m/z$ :  $[M]^+$  Calcd for  $C_{20}H_{15}NO_2S$ , 333.0823; found, 333.0824.

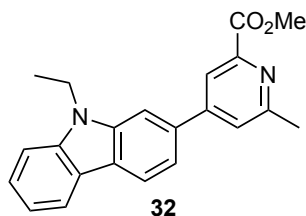

methyl 4-(9-ethyl-9*H*-carbazol-2-yl)-6-methylpicolinate (**32**): Following the general procedure A for pyridine synthesis with  $\alpha,\beta$ -unsaturated oxime **17** (64 mg, 0.20 mmol) and methyl acrylate (**2a**), purification by flash column chromatography (hexane : AcOEt = 3 : 1) afforded the title compound (yellow oil, 38 mg, 55% yield).  $^1H$  NMR ( $CDCl_3$ , 300 MHz)  $\delta$  8.44 (d, 1H,  $J = 1.5$  Hz), 8.35 (d, 1H,  $J = 1.5$  Hz), 8.18 (d, 1H,  $J = 7.8$  Hz), 7.81 (dd, 1H,  $J = 8.7, 1.8$  Hz), 7.70 (d, 1H,  $J = 1.5$  Hz), 7.56–7.43 (m, 3H), 7.29 (td, 1H,  $J = 8.7, 1.5$  Hz), 4.41 (q, 2H,  $J = 7.2$  Hz), 4.06 (s, 3H), 2.75 (s, 3H), 1.47 (t, 3H,  $J = 7.2$  Hz).  $^{13}C\{^1H\}$  NMR ( $CDCl_3$ , 75 MHz)  $\delta$  166.4, 159.3, 150.6, 147.9, 140.6, 140.5, 127.9, 126.3, 124.7, 124.3, 123.7, 122.9, 120.6, 119.5, 119.2, 109.0, 108.8, 53.0, 37.8, 24.8, 13.8; HRMS (EI-quadrupole)  $m/z$ :  $[M]^+$  Calcd for  $C_{22}H_{20}N_2O_2$ , 344.1525; found, 344.1520.



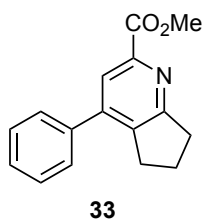

methyl 4-phenyl-6,7-dihydro-5*H*-cyclopenta[*b*]pyridine-2-carboxylate (**33**): Following the general procedure A for pyridine synthesis with  $\alpha,\beta$ -unsaturated oxime **18** (46 mg, 0.20 mmol) and methyl acrylate (**2a**), purification by flash column chromatography (hexane : AcOEt = 1 : 1) afforded the title compound (white solid, 42 mg, 83% yield).  $^1\text{H}$  NMR ( $\text{CDCl}_3$ , 300 MHz)  $\delta$  8.03 (s, 1H), 7.60–7.40 (m, 5H), 4.02 (s, 3H), 3.12 (t, 2H,  $J = 7.5$  Hz), 3.10 (t, 2H,  $J = 7.5$  Hz), 2.16 (tt, 2H,  $J = 7.5, 7.5$  Hz).  $^{13}\text{C}\{^1\text{H}\}$  NMR ( $\text{CDCl}_3$ , 75 MHz)  $\delta$  167.4, 166.3, 146.6, 145.9, 139.0, 137.8, 128.7, 128.2, 123.0, 52.8, 34.6, 31.1, 23.6; HRMS (EI-quadrupole)  $m/z$ :  $[\text{M}]^+$  Calcd for  $\text{C}_{16}\text{H}_{15}\text{NO}_2$ , 253.1103; found, 253.1104.

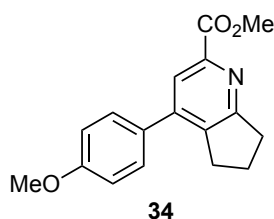

methyl 4-(4-methoxyphenyl)-6,7-dihydro-5*H*-cyclopenta[*b*]pyridine-2-carboxylate (**34**): Following the general procedure A for pyridine synthesis with  $\alpha,\beta$ -unsaturated oxime **19** (52 mg, 0.20 mmol) and methyl acrylate (**2a**), purification by flash column chromatography (hexane : AcOEt = 1 : 1) afforded the title compound (white solid, 40 mg, 70% yield).  $^1\text{H}$  NMR ( $\text{CDCl}_3$ , 300 MHz)  $\delta$  8.01 (s, 1H), 7.48 (d, 2H,  $J = 9.0$  Hz), 7.01 (d, 2H,  $J = 9.0$  Hz), 4.01 (s, 3H), 3.87 (s, 3H), 3.17 (t, 2H,  $J = 7.5$  Hz), 3.10 (t, 2H,  $J = 7.5$  Hz), 2.15 (tt, 2H,  $J = 7.5, 7.5$  Hz).  $^{13}\text{C}\{^1\text{H}\}$  NMR ( $\text{CDCl}_3$ , 75 MHz)  $\delta$  167.3, 166.4, 160.0, 146.5, 145.5, 138.5, 130.0, 129.5, 122.7, 114.1, 55.3, 52.8, 34.6, 31.3, 23.6; HRMS (EI-quadrupole)  $m/z$ :  $[\text{M}]^+$  Calcd for  $\text{C}_{17}\text{H}_{17}\text{NO}_3$ , 283.1208; found, 283.1210.

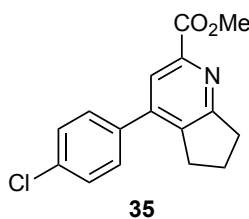

methyl 4-(4-chlorophenyl)-6,7-dihydro-5*H*-cyclopenta[*b*]pyridine-2-carboxylate (**35**): Following the general procedure A for pyridine synthesis with  $\alpha,\beta$ -unsaturated oxime **20** (53 mg, 0.20 mmol) and methyl acrylate (**2a**), purification by flash column chromatography (hexane : AcOEt = 5 : 1) afforded

the title compound (white solid, 53 mg, 91% yield).  $^1\text{H}$  NMR ( $\text{CDCl}_3$ , 300 MHz)  $\delta$  7.99 (s, 1H), 7.50–7.40 (m, 4H), 4.02 (s, 3H), 3.18 (t, 2H,  $J = 7.8$  Hz), 3.07 (t, 2H,  $J = 7.5$  Hz), 2.17 (tt, 2H,  $J = 7.8, 7.5$  Hz).  $^{13}\text{C}\{^1\text{H}\}$  NMR ( $\text{CDCl}_3$ , 75 MHz)  $\delta$  167.5, 166.1, 146.7, 144.7, 138.8, 136.1, 134.9, 129.5, 129.0, 122.6, 52.8, 34.5, 31.0, 23.5; HRMS (EI-quadrupole)  $m/z$ :  $[\text{M}]^+$  Calcd for  $\text{C}_{16}\text{H}_{14}\text{ClNO}_2$ , 287.0713, 289.0684; found, 287.0721, 289.0690.

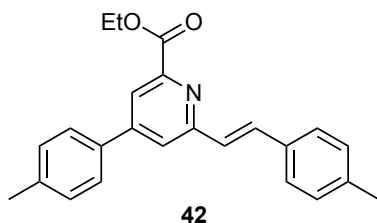

ethyl (*E*)-6-(4-methylstyryl)-4-(*p*-tolyl)picolinate (**42**): Following the general procedure A for pyridine synthesis with  $\alpha,\beta$ -unsaturated oxime **6** (32 mg, 0.10 mmol) and ethyl acrylate (**2b**), purification by flash column chromatography (hexane : AcOEt = 5 : 1) afforded the title compound (pale yellow oil, 31 mg, 86% yield).  $^1\text{H}$  NMR ( $\text{CDCl}_3$ , 300 MHz)  $\delta$  8.18 (d, 1H,  $J = 1.5$  Hz), 7.81 (d, 1H,  $J = 1.5$  Hz), 7.67 (d, 1H,  $J = 15.6$  Hz), 7.63 (d, 2H,  $J = 7.8$  Hz), 7.52 (d, 2H,  $J = 8.1$  Hz), 7.35–7.27 (m, 3H), 7.20 (d, 2H,  $J = 8.1$  Hz), 4.52 (q, 2H,  $J = 7.2$  Hz), 2.44 (s, 3H), 2.38 (s, 3H), 1.48 (t, 3H,  $J = 7.2$  Hz).  $^{13}\text{C}\{^1\text{H}\}$  NMR ( $\text{CDCl}_3$ , 75 MHz)  $\delta$  165.6, 156.9, 149.8, 148.7, 139.6, 138.7, 134.6, 134.1, 129.9, 129.8, 129.5, 127.2, 127.1, 126.9, 121.6, 121.0, 62.0, 21.32, 21.27, 14.4; HRMS (EI-quadrupole)  $m/z$ :  $[\text{M}]^+$  Calcd for  $\text{C}_{24}\text{H}_{23}\text{NO}_2$ , 356.1729; found, 356.1718.

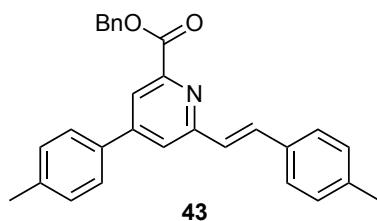

benzyl (*E*)-6-(4-methylstyryl)-4-(*p*-tolyl)picolinate (**43**): Following the general procedure B for pyridine synthesis with  $\alpha,\beta$ -unsaturated oxime **6** (32 mg, 0.10 mmol) and benzyl acrylate (**2c**), purification by flash column chromatography (hexane : AcOEt = 5 : 1) afforded the title compound (pale yellow solid, 33 mg, 79% yield).  $^1\text{H}$  NMR ( $\text{CDCl}_3$ , 300 MHz)  $\delta$  8.16 (d, 1H,  $J = 1.5$  Hz), 7.79 (d, 1H,  $J = 1.5$  Hz), 7.68 (d, 1H,  $J = 16.2$  Hz), 7.61 (d, 2H,  $J = 8.1$  Hz), 7.55–7.47 (m, 4H), 7.45–7.26 (m, 6H), 7.20 (d, 2H,  $J = 7.8$  Hz), 5.50 (s, 2H), 2.43 (s, 3H), 2.38 (s, 3H).  $^{13}\text{C}\{^1\text{H}\}$  NMR ( $\text{CDCl}_3$ , 75 MHz)  $\delta$  165.4, 157.0, 149.9, 148.5, 139.6, 138.7, 135.8, 134.6, 134.2, 133.6, 129.9, 129.5, 128.6, 128.4, 128.3, 127.2, 126.9, 126.8, 121.8, 121.2, 67.4, 21.3, 21.2; HRMS (EI-quadrupole)  $m/z$ :  $[\text{M}]^+$  Calcd for  $\text{C}_{29}\text{H}_{25}\text{NO}_2$ , 419.1885; found, 419.1872.

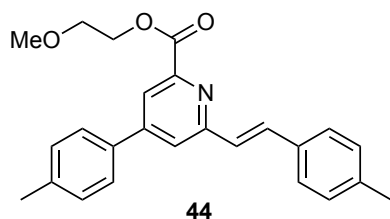

2-methoxyethyl (*E*)-6-(4-methylstyryl)-4-(*p*-tolyl)picolinate (**44**): Following the general procedure B for pyridine synthesis with  $\alpha,\beta$ -unsaturated oxime **6** (32 mg, 0.10 mmol) and 2-methoxyethyl acrylate (**2d**), purification by flash column chromatography (hexane : AcOEt = 4 : 1) afforded the title compound (pale yellow solid, 36 mg, 93% yield).  $^1\text{H}$  NMR ( $\text{CDCl}_3$ , 300 MHz)  $\delta$  8.11 (d, 1H,  $J = 1.5$  Hz), 7.72 (d, 1H,  $J = 1.5$  Hz), 7.61 (d, 1H,  $J = 16.2$  Hz), 7.55 (d, 2H,  $J = 8.1$  Hz), 7.44 (d, 2H,  $J = 8.1$  Hz), 7.26–7.21 (m, 3H), 7.13 (d, 2H,  $J = 8.1$  Hz), 4.54 (t, 2H,  $J = 4.8$  Hz), 3.74 (t, 2H,  $J = 4.8$  Hz), 3.39 (s, 3H), 2.36 (s, 3H), 2.31 (s, 3H).  $^{13}\text{C}\{^1\text{H}\}$  NMR ( $\text{CDCl}_3$ , 75 MHz)  $\delta$  165.5, 157.0, 149.9, 148.3, 139.6, 138.7, 134.6, 134.1, 133.6, 129.9, 129.5, 127.2, 126.9, 126.8, 121.8, 121.2, 70.4, 64.7, 59.1, 21.3, 21.2; HRMS (EI-quadrupole)  $m/z$ :  $[\text{M}]^+$  Calcd for  $\text{C}_{25}\text{H}_{25}\text{NO}_3$ , 387.1834; found, 387.1826.

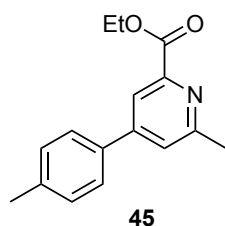

ethyl 6-methyl-4-(*p*-tolyl)picolinate (**45**): Following the general procedure A for pyridine synthesis with  $\alpha,\beta$ -unsaturated oxime **12** (43 mg, 0.20 mmol) and ethyl acrylate (**2b**), purification by flash column chromatography (hexane : AcOEt = 5 : 1) afforded the title compound (white solid, 40 mg, 80% yield).  $^1\text{H}$  NMR ( $\text{CDCl}_3$ , 300 MHz)  $\delta$  8.17 (d, 1H,  $J = 1.5$  Hz), 7.58 (d, 2H,  $J = 8.1$  Hz), 7.53 (d, 1H,  $J = 1.5$  Hz), 7.30 (d, 2H,  $J = 8.1$  Hz), 4.51 (q, 2H,  $J = 7.2$  Hz), 2.71 (s, 3H), 2.42 (s, 3H), 1.45 (t, 3H,  $J = 7.2$  Hz).  $^{13}\text{C}\{^1\text{H}\}$  NMR ( $\text{CDCl}_3$ , 75 MHz)  $\delta$  165.6, 159.4, 149.5, 148.3, 139.5, 134.5, 129.8, 126.8, 124.0, 120.3, 61.9, 24.7, 21.2, 14.3; HRMS (EI-quadrupole)  $m/z$ :  $[\text{M}]^+$  Calcd for  $\text{C}_{16}\text{H}_{17}\text{NO}_2$ , 255.1259; found, 255.1268.

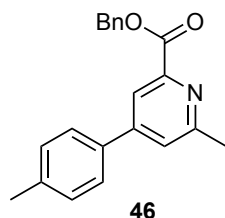

benzyl 6-methyl-4-(*p*-tolyl)picolinate (**46**): Following the general procedure B for pyridine synthesis with  $\alpha,\beta$ -unsaturated oxime **12** (43 mg, 0.20 mmol) and benzyl acrylate (**2c**), purification by flash column chromatography (hexane : AcOEt = 5 : 1) afforded the title compound (white solid, 43 mg, 70% yield).  $^1\text{H}$  NMR ( $\text{CDCl}_3$ , 300 MHz)  $\delta$  8.15 (d, 1H,  $J = 1.2$  Hz), 7.58–7.48 (m, 5H), 7.40–7.26

(m, 5H), 5.48 (s, 2H), 2.71 (s, 3H), 2.41 (s, 3H).  $^{13}\text{C}\{^1\text{H}\}$  NMR ( $\text{CDCl}_3$ , 75 MHz)  $\delta$  165.4, 159.5, 149.6, 148.1, 139.6, 135.9, 134.5, 129.9, 128.5, 128.3, 126.9, 124.2, 120.5, 67.4, 24.7, 21.2; HRMS (EI-quadrupole)  $m/z$ :  $[\text{M}]^+$  Calcd for  $\text{C}_{21}\text{H}_{19}\text{NO}_2$ , 317.1416; found, 317.1420.

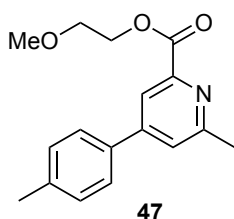

2-methoxyethyl 6-methyl-4-(*p*-tolyl)picolinate (**47**): Following the general procedure B for pyridine synthesis with  $\alpha,\beta$ -unsaturated oxime **12** (43 mg, 0.20 mmol) and 2-methoxyethyl acrylate (**2d**), purification by flash column chromatography (hexane : AcOEt = 3 : 1) afforded the title compound (colorless oil, 38 mg, 66% yield).  $^1\text{H}$  NMR ( $\text{CDCl}_3$ , 300 MHz)  $\delta$  8.09 (d, 1H,  $J = 1.5$  Hz), 7.50 (d, 2H,  $J = 8.1$  Hz), 7.45 (d, 1H,  $J = 1.5$  Hz), 7.22 (d, 2H,  $J = 8.1$  Hz), 4.51 (t, 2H,  $J = 4.8$  Hz), 3.71 (t, 2H,  $J = 4.8$  Hz), 3.36 (s, 3H), 2.63 (s, 3H), 2.34 (s, 3H).  $^{13}\text{C}\{^1\text{H}\}$  NMR ( $\text{CDCl}_3$ , 75 MHz)  $\delta$  165.5, 159.5, 149.6, 147.9, 139.5, 134.5, 129.8, 126.9, 124.3, 124.1, 120.5, 120.4, 70.3, 64.5, 59.0, 58.9, 24.7, 21.2; HRMS (EI-quadrupole)  $m/z$ :  $[\text{M}]^+$  Calcd for  $\text{C}_{17}\text{H}_{19}\text{NO}_3$ , 285.1365; found, 285.1368.

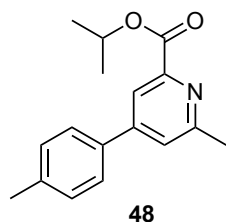

isopropyl 6-methyl-4-(*p*-tolyl)picolinate (**48**): Following the general procedure B for pyridine synthesis with  $\alpha,\beta$ -unsaturated oxime **12** (43 mg, 0.20 mmol) and isopropyl acrylate (**2e**), purification by flash column chromatography (hexane : AcOEt = 3 : 1) afforded the title compound (white solid, 51 mg, 95% yield).  $^1\text{H}$  NMR ( $\text{CDCl}_3$ , 300 MHz)  $\delta$  8.11 (d, 1H,  $J = 1.5$  Hz), 7.57 (d, 2H,  $J = 7.8$  Hz), 7.51 (d, 1H,  $J = 1.5$  Hz), 7.30 (d, 2H,  $J = 7.8$  Hz), 5.40–5.30 (m, 1H), 2.71 (s, 3H), 2.42 (s, 3H), 1.43 (d, 6H,  $J = 6.3$  Hz).  $^{13}\text{C}\{^1\text{H}\}$  NMR ( $\text{CDCl}_3$ , 75 MHz)  $\delta$  165.0, 159.4, 149.5, 148.6, 139.4, 134.6, 129.8, 126.9, 123.9, 120.1, 69.4, 24.7, 21.8, 21.2; HRMS (EI-quadrupole)  $m/z$ :  $[\text{M}]^+$  Calcd for  $\text{C}_{17}\text{H}_{19}\text{NO}_2$ , 269.1416; found, 269.1418.

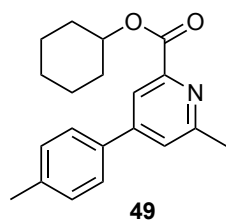

cyclohexyl 6-methyl-4-(*p*-tolyl)picolinate (**49**): Following the general procedure B for pyridine synthesis with  $\alpha,\beta$ -unsaturated oxime **12** (43 mg, 0.20 mmol) and cyclohexyl acrylate (**2f**),

purification by flash column chromatography (hexane : AcOEt = 4 : 1) afforded the title compound (colorless oil, 59 mg, 94% yield).  $^1\text{H}$  NMR ( $\text{CDCl}_3$ , 300 MHz)  $\delta$  8.10 (d, 1H,  $J = 1.5$  Hz), 7.57 (d, 2H,  $J = 8.1$  Hz), 7.50 (d, 1H,  $J = 1.5$  Hz), 7.30 (d, 2H,  $J = 8.1$  Hz), 5.14–5.05 (m, 1H), 2.71 (s, 3H), 2.42 (s, 3H), 2.15–2.00 (m, 2H), 1.90–1.75 (m, 2H), 1.70–1.20 (m, 6H).  $^{13}\text{C}\{^1\text{H}\}$  NMR ( $\text{CDCl}_3$ , 75 MHz)  $\delta$  164.8, 159.4, 149.4, 148.7, 139.4, 134.7, 129.8, 126.8, 123.9, 120.1, 74.2, 31.6, 25.4, 24.7, 23.9, 21.2; HRMS (EI-quadrupole)  $m/z$ :  $[\text{M}]^+$  Calcd for  $\text{C}_{20}\text{H}_{23}\text{NO}_2$ , 309.1729; found, 309.1732.

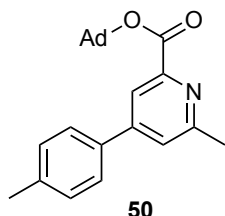

(3*s*,5*s*,7*s*)-adamantan-1-yl 6-methyl-4-(*p*-tolyl)picolinate (**50**): Following the general procedure B for pyridine synthesis with  $\alpha,\beta$ -unsaturated oxime **12** (43 mg, 0.20 mmol) and adamantane-1-yl acrylate (**2g**), purification by flash column chromatography (hexane : AcOEt = 4 : 1) afforded the title compound (colorless oil, 60 mg, 83% yield).  $^1\text{H}$  NMR ( $\text{CDCl}_3$ , 300 MHz)  $\delta$  8.04 (d, 1H,  $J = 1.5$  Hz), 7.55 (d, 2H,  $J = 7.8$  Hz), 7.48 (d, 1H,  $J = 1.5$  Hz), 7.29 (d, 2H,  $J = 7.8$  Hz), 2.69 (s, 3H), 2.42 (s, 3H), 2.35–2.30 (m, 6H), 2.25–2.20 (m, 3H), 1.80–1.60 (m, 6H).  $^{13}\text{C}\{^1\text{H}\}$  NMR ( $\text{CDCl}_3$ , 75 MHz)  $\delta$  164.0, 159.3, 149.5, 149.4, 139.3, 134.8, 129.8, 126.9, 123.6, 119.9, 82.1, 41.2, 36.2, 30.9, 24.7, 21.2; HRMS (EI-quadrupole)  $m/z$ :  $[\text{M}]^+$  Calcd for  $\text{C}_{24}\text{H}_{27}\text{NO}_2$ , 361.2042; found, 361.2037.

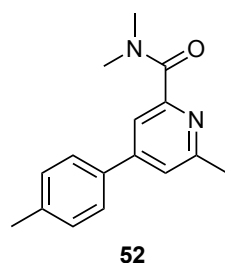

*N,N*,6-trimethyl-4-(*p*-tolyl)picolinamide (**52**): Following the general procedure B for pyridine synthesis with  $\alpha,\beta$ -unsaturated oxime **12** (43 mg, 0.20 mmol) and *N,N*-dimethylacrylamide (**2i**), purification by flash column chromatography (AcOEt only) afforded the title compound (colorless oil, 22 mg, 43% yield).  $^1\text{H}$  NMR ( $\text{CDCl}_3$ , 300 MHz)  $\delta$  7.60 (d, 1H,  $J = 1.5$  Hz), 7.55 (d, 2H,  $J = 8.1$  Hz), 7.39 (d, 1H,  $J = 1.5$  Hz), 7.28 (d, 2H,  $J = 8.1$  Hz), 3.15 (s, 3H), 3.08 (s, 3H), 2.63 (s, 3H), 2.41 (s, 3H).  $^{13}\text{C}\{^1\text{H}\}$  NMR ( $\text{CDCl}_3$ , 75 MHz)  $\delta$  169.5, 157.9, 154.5, 149.6, 139.4, 134.8, 129.8, 126.8, 121.4, 118.0, 39.0, 35.6, 24.5, 21.2; HRMS (EI-quadrupole)  $m/z$ :  $[\text{M}]^+$  Calcd for  $\text{C}_{16}\text{H}_{18}\text{N}_2\text{O}$ , 254.1419; found, 254.1418.

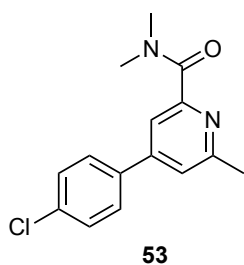

4-(4-chlorophenyl)-*N,N*,6-trimethylpicolinamide (**53**): Following the general procedure B for pyridine synthesis with  $\alpha,\beta$ -unsaturated oxime **14** (24 mg, 0.10 mmol) and *N,N*-dimethylacrylamide (**2i**), purification by flash column chromatography (AcOEt only) afforded the title compound (colorless oil, 17 mg, 62% yield).  $^1\text{H}$  NMR ( $\text{CDCl}_3$ , 300 MHz)  $\delta$  7.58 (d, 2H,  $J = 8.7$  Hz), 7.57 (d, 1H,  $J = 1.2$  Hz), 7.46 (d, 2H,  $J = 8.7$  Hz), 7.37 (d, 1H,  $J = 1.2$  Hz), 3.15 (s, 3H), 3.10 (s, 3H), 2.64 (s, 3H).  $^{13}\text{C}\{^1\text{H}\}$  NMR ( $\text{CDCl}_3$ , 75 MHz)  $\delta$  169.2, 158.1, 154.7, 148.5, 136.3, 135.5, 129.3, 128.3, 121.4, 118.2, 39.0, 35.7, 24.5; HRMS (EI-quadrupole)  $m/z$ :  $[\text{M}]^+$  Calcd for  $\text{C}_{15}\text{H}_{15}\text{ClN}_2\text{O}$ , 274.0873; found, 274.0869.

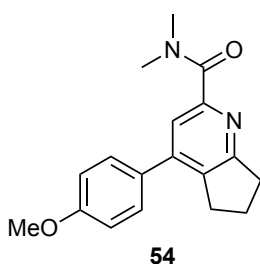

4-(4-methoxyphenyl)-*N,N*-dimethyl-6,7-dihydro-5*H*-cyclopenta[*b*]pyridine-2-carboxamide (**54**): Following the general procedure B for pyridine synthesis with  $\alpha,\beta$ -unsaturated oxime **19** (26 mg, 0.10 mmol) and *N,N*-dimethylacrylamide (**2i**), purification by flash column chromatography (AcOEt only) afforded the title compound (colorless oil, 26 mg, 88% yield).  $^1\text{H}$  NMR ( $\text{CDCl}_3$ , 300 MHz)  $\delta$  7.46 (d, 2H,  $J = 8.7$  Hz), 7.41 (s, 1H), 6.99 (d, 2H,  $J = 8.7$  Hz), 3.86 (s, 3H), 3.14 (s, 3H), 3.11 (s, 3H), 3.10–3.05 (m, 4H), 2.20–2.10 (m, 2H).  $^{13}\text{C}\{^1\text{H}\}$  NMR ( $\text{CDCl}_3$ , 75 MHz)  $\delta$  169.7, 165.4, 159.9, 152.9, 145.7, 135.1, 130.4, 129.4, 120.0, 114.1, 55.3, 39.1, 35.6, 34.4, 31.1, 23.5; HRMS (EI-quadrupole)  $m/z$ :  $[\text{M}]^+$  Calcd for  $\text{C}_{18}\text{H}_{20}\text{N}_2\text{O}_2$ , 296.1525; found, 296.1523.

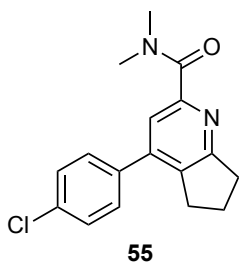

4-(4-chlorophenyl)-*N,N*-dimethyl-6,7-dihydro-5*H*-cyclopenta[*b*]pyridine-2-carboxamide (**55**): Following the general procedure B for pyridine synthesis with  $\alpha,\beta$ -unsaturated oxime **20** (26 mg,

0.10 mmol) and *N,N*-dimethylacrylamide (**2i**), purification by flash column chromatography (hexane : AcOEt = 2 : 1) afforded the title compound (colorless oil, 28 mg, 94% yield). <sup>1</sup>H NMR (CDCl<sub>3</sub>, 300 MHz) δ 7.44 (s, 4H), 7.41 (s, 1H), 3.14 (s, 3H), 3.11 (s, 3H), 3.11–3.00 (m, 4H), 2.19–2.13 (m, 2H). <sup>13</sup>C{<sup>1</sup>H} NMR (CDCl<sub>3</sub>, 75 MHz) δ 169.4, 165.7, 153.1, 144.9, 136.5, 135.4, 134.7, 129.4, 128.9, 120.2, 39.1, 35.7, 34.4, 30.8, 23.4; HRMS (EI-quadrupole) *m/z*: [M]<sup>+</sup> Calcd for C<sub>17</sub>H<sub>17</sub>ClN<sub>2</sub>O, 300.1029, 302.1000; found, 300.1017, 302.0986.

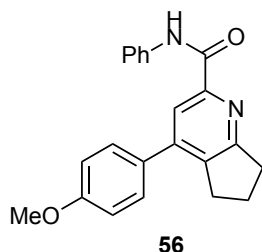

4-(4-methoxyphenyl)-*N*-phenyl-6,7-dihydro-5*H*-cyclopenta[*b*]pyridine-2-carboxamide (**56**):

Following the general procedure B for pyridine synthesis with  $\alpha,\beta$ -unsaturated oxime **19** (26 mg, 0.10 mmol) and *N*-phenyl acrylamide (**2j**), purification by flash column chromatography (hexane : AcOEt = 5 : 1) afforded the title compound (white solid, 20 mg, 58% yield). <sup>1</sup>H NMR (CDCl<sub>3</sub>, 300 MHz) δ 8.15 (s, 1H), 7.81 (d, 2H, *J* = 8.4 Hz), 7.51 (d, 2H, *J* = 9.0 Hz), 7.39 (dd, 2H, *J* = 9.0, 7.5 Hz), 7.14 (t, 1H, *J* = 7.5 Hz), 7.01 (d, 2H, *J* = 9.0 Hz), 3.87 (s, 3H), 3.15–3.09 (m, 4H), 2.25–2.15 (m, 2H). <sup>13</sup>C{<sup>1</sup>H} NMR (CDCl<sub>3</sub>, 75 MHz) δ 165.5, 162.7, 160.0, 148.5, 146.1, 138.0, 137.8, 130.3, 129.6, 129.0, 124.0, 119.7, 119.6, 114.1, 55.4, 34.2, 31.3, 23.7; HRMS (EI-quadrupole) *m/z*: [M]<sup>+</sup> Calcd for C<sub>22</sub>H<sub>20</sub>N<sub>2</sub>O<sub>2</sub>, 344.1525; found, 344.1513.

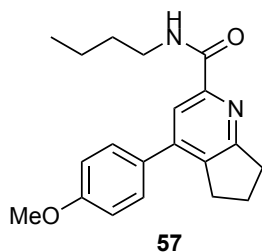

*N*-butyl-4-(4-methoxyphenyl)-6,7-dihydro-5*H*-cyclopenta[*b*]pyridine-2-carboxamide (**57**):

Following the general procedure B for pyridine synthesis with  $\alpha,\beta$ -unsaturated oxime **19** (26 mg, 0.10 mmol) and *N*-butyl acrylamide (**2k**), purification by flash column chromatography (hexane : AcOEt = 3 : 1) afforded the title compound (colorless oil, 27 mg, 84% yield). <sup>1</sup>H NMR (CDCl<sub>3</sub>, 300 MHz) δ 8.15–8.05 (br, 1H), 8.05 (s, 1H), 7.49 (d, 2H, *J* = 9.0 Hz), 6.99 (d, 2H, *J* = 9.0 Hz), 3.87 (s, 3H), 3.48 (q, 2H, *J* = 7.2 Hz), 3.11–3.02 (m, 4H), 2.18–2.10 (m, 2H), 1.70–1.64 (m, 2H), 1.50–1.40 (m, 2H), 0.97 (t, 3H, *J* = 7.2 Hz). <sup>13</sup>C{<sup>1</sup>H} NMR (CDCl<sub>3</sub>, 75 MHz) δ 165.4, 164.9, 159.9, 148.8, 145.7, 137.1, 130.4, 129.6, 119.3, 114.0, 55.3, 39.1, 34.2, 31.8, 31.2, 23.7, 20.2, 13.8; HRMS (EI-quadrupole) *m/z*: [M]<sup>+</sup> Calcd for C<sub>20</sub>H<sub>24</sub>N<sub>2</sub>O<sub>2</sub>, 324.1838; found, 324.1835.

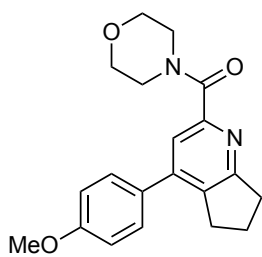

**58**

(4-(4-methoxyphenyl)-6,7-dihydro-5H-cyclopenta[*b*]pyridin-2-yl)(morpholino)methanone (**58**):

Following the general procedure B for pyridine synthesis with  $\alpha,\beta$ -unsaturated oxime **19** (26 mg, 0.10 mmol) and 4-acryloylmorpholine (**2l**), purification by flash column chromatography (AcOEt only) afforded the title compound (colorless oil, 30 mg, 90% yield).  $^1\text{H}$  NMR ( $\text{CDCl}_3$ , 300 MHz)  $\delta$  7.46 (d, 2H,  $J = 8.7$  Hz), 7.45 (s, 1H), 6.99 (d, 2H,  $J = 8.7$  Hz), 3.86 (s, 3H), 3.85–3.75 (m, 4H), 3.75–3.60 (m, 4H), 3.15–3.04 (m, 4H), 2.20–2.09 (m, 2H).  $^{13}\text{C}\{^1\text{H}\}$  NMR ( $\text{CDCl}_3$ , 75 MHz)  $\delta$  168.2, 165.6, 159.9, 152.0, 145.8, 135.5, 130.2, 129.4, 120.6, 114.1, 67.0, 66.8, 55.3, 47.9, 42.7, 34.5, 31.1, 23.5; HRMS (EI-quadrupole)  $m/z$ :  $[\text{M}]^+$  Calcd for  $\text{C}_{20}\text{H}_{22}\text{N}_2\text{O}_3$ , 338.1630; found, 338.1636.

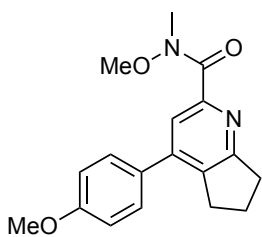

**59**

*N*-methoxy-4-(4-methoxyphenyl)-*N*-methyl-6,7-dihydro-5H-cyclopenta[*b*]pyridine-2-carboxamide

(**59**): Following the general procedure B for pyridine synthesis with  $\alpha,\beta$ -unsaturated oxime **19** (26 mg, 0.10 mmol) and *N*-methoxy-*N*-methyl acrylamide (**2m**), purification by flash column chromatography (hexane : AcOEt = 3 : 1) afforded the title compound (white solid, 15 mg, 48% yield).  $^1\text{H}$  NMR ( $\text{CDCl}_3$ , 300 MHz)  $\delta$  7.47 (s, 1H), 7.46 (d, 2H,  $J = 9.0$  Hz), 6.99 (d, 2H,  $J = 9.0$  Hz), 3.86 (s, 3H), 3.79 (s, 3H), 3.42 (s, 3H), 3.13–3.04 (m, 4H), 2.20–2.10 (m, 2H).  $^{13}\text{C}\{^1\text{H}\}$  NMR ( $\text{CDCl}_3$ , 75 MHz)  $\delta$  165.7, 159.9, 151.4, 145.4, 135.9, 130.4, 129.5, 120.2, 114.1, 61.4, 55.3, 34.4, 31.1, 23.5; HRMS (ESI-TOF)  $m/z$ :  $[\text{M}+\text{Na}]^+$  Calcd for  $\text{C}_{18}\text{H}_{20}\text{N}_2\text{NaO}_3$ , 335.1372; found, 335.1370.

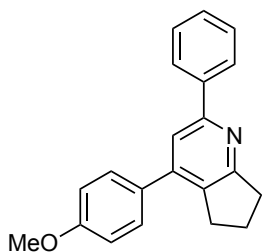

**60**

4-(4-methoxyphenyl)-2-phenyl-6,7-dihydro-5H-cyclopenta[*b*]pyridine (**60**): Following the general procedure A for pyridine synthesis with  $\alpha,\beta$ -unsaturated oxime **19** (26 mg, 0.10 mmol) and styrene



(**2n**), purification by flash column chromatography (hexane : AcOEt = 10 : 1) afforded the title compound (white solid, 10 mg, 33% yield). <sup>1</sup>H NMR (CDCl<sub>3</sub>, 300 MHz) δ 7.97 (d, 2H, *J* = 8.7 Hz), 7.53–7.40 (m, 6H), 7.02 (d, 2H, *J* = 8.7 Hz), 3.88 (s, 3H), 3.15 (t, 2H, *J* = 7.8 Hz), 3.07 (t, 2H, *J* = 7.2 Hz), 2.20–2.13 (m, 2H). <sup>13</sup>C{<sup>1</sup>H} NMR (CDCl<sub>3</sub>, 75 MHz) δ 166.6, 159.7, 156.4, 145.5, 140.0, 132.9, 131.3, 129.4, 128.6, 128.4, 127.0, 117.9, 114.1, 55.4, 34.8, 30.8, 23.6; HRMS (EI-quadrupole) *m/z*: [M]<sup>+</sup> Calcd for C<sub>21</sub>H<sub>19</sub>NO, 301.1467; found, 301.1469.

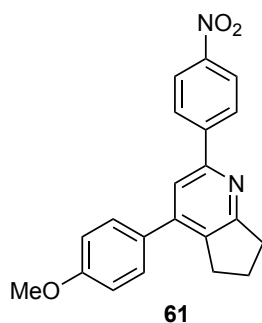

4-(4-methoxyphenyl)-2-(4-nitrophenyl)-6,7-dihydro-5*H*-cyclopenta[*b*]pyridine (**61**): Following the general procedure A for pyridine synthesis with  $\alpha,\beta$ -unsaturated oxime **19** (26 mg, 0.10 mmol) and 4-nitrostyrene (**2o**), purification by flash column chromatography (hexane : AcOEt = 4 : 1) afforded the title compound (pale yellow solid, 16 mg, 46% yield). <sup>1</sup>H NMR (CDCl<sub>3</sub>, 300 MHz) δ 8.30 (d, 2H, *J* = 9.0 Hz), 8.18 (d, 2H, *J* = 9.0 Hz), 7.58 (s, 1H), 7.49 (d, 2H, *J* = 9.0 Hz), 7.03 (d, 2H, *J* = 9.0 Hz), 3.89 (s, 3H), 3.16 (t, 2H, *J* = 7.8 Hz), 3.10 (t, 2H, *J* = 7.8 Hz), 2.25–2.10 (m, 2H). <sup>13</sup>C{<sup>1</sup>H} NMR (CDCl<sub>3</sub>, 75 MHz) δ 167.3, 159.9, 153.6, 147.8, 146.1, 145.8, 134.6, 130.7, 129.4, 127.6, 123.9, 118.6, 114.2, 55.4, 34.7, 30.9, 23.5; HRMS (EI-quadrupole) *m/z*: [M]<sup>+</sup> Calcd for C<sub>21</sub>H<sub>18</sub>N<sub>2</sub>O<sub>3</sub>, 346.1317; found, 346.1307.

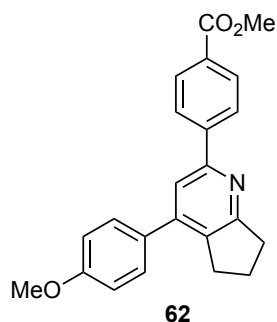

methyl 4-(4-(4-methoxyphenyl)-6,7-dihydro-5*H*-cyclopenta[*b*]pyridin-2-yl)benzoate (**62**): Following the general procedure A for pyridine synthesis with  $\alpha,\beta$ -unsaturated oxime **19** (26 mg, 0.10 mmol) and methyl 4-vinylbenzoate (**2p**), purification by flash column chromatography (hexane : AcOEt = 3 : 1) afforded the title compound (white solid, 20 mg, 56% yield). <sup>1</sup>H NMR (CDCl<sub>3</sub>, 300 MHz) δ 8.13 (d, 2H, *J* = 8.7 Hz), 8.07 (d, 2H, *J* = 8.7 Hz), 7.56 (s, 1H), 7.49 (d, 2H, *J* = 9.0 Hz), 7.02 (d, 2H, *J* = 9.0 Hz), 3.94 (s, 3H), 3.88 (s, 3H), 3.16 (t, 2H, *J* = 7.5 Hz), 3.08 (t, 2H, *J* = 7.5 Hz), 2.20–2.13 (m, 2H). <sup>13</sup>C{<sup>1</sup>H} NMR (CDCl<sub>3</sub>, 75 MHz) δ 167.0, 166.9, 159.8, 155.1, 145.6, 144.3, 133.8,

131.1, 130.0, 129.8, 129.4, 126.8, 118.3, 114.1, 55.4, 52.1, 34.7, 30.9, 23.6; HRMS (EI-quadrupole)  $m/z$ :  $[M]^+$  Calcd for  $C_{23}H_{21}NO_3$ , 359.1521; found, 359.1522.

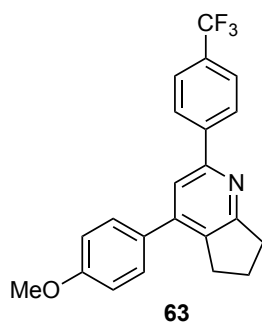

4-(4-methoxyphenyl)-2-(4-(trifluoromethyl)phenyl)-6,7-dihydro-5H-cyclopenta[*b*]pyridine (**63**): Following the general procedure A for pyridine synthesis with  $\alpha,\beta$ -unsaturated oxime **19** (26 mg, 0.10 mmol) and 4-trifluoromethylstyrene (**2q**), purification by flash column chromatography (hexane : AcOEt = 4 : 1) afforded the title compound (white solid, 33 mg, 89% yield).  $^1H$  NMR ( $CDCl_3$ , 300 MHz)  $\delta$  8.11 (d, 2H,  $J = 8.1$  Hz), 7.71 (d, 2H,  $J = 8.1$  Hz), 7.53 (s, 1H), 7.49 (d, 2H,  $J = 8.7$  Hz), 7.02 (d, 2H,  $J = 8.7$  Hz), 3.88 (s, 3H), 3.16 (t, 2H,  $J = 7.5$  Hz), 3.09 (t, 2H,  $J = 7.5$  Hz), 2.20–2.13 (m, 2H).  $^{13}C\{^1H\}$  NMR ( $CDCl_3$ , 75 MHz)  $\delta$  167.0, 159.9, 154.7, 142.6 (q,  $J = 173$  Hz), 133.9, 131.0, 129.4, 127.2, 125.6, 125.5, 118.2, 114.1, 55.4, 34.7, 30.9, 23.6; HRMS (EI-quadrupole)  $m/z$ :  $[M]^+$  Calcd for  $C_{22}H_{18}F_3NO$ , 369.1340; found, 369.1346.

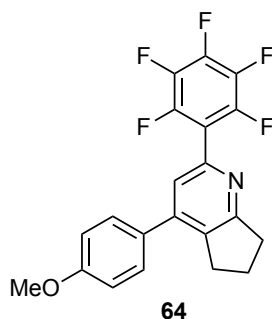

4-(4-methoxyphenyl)-2-(perfluorophenyl)-6,7-dihydro-5H-cyclopenta[*b*]pyridine (**64**): Following the general procedure A for pyridine synthesis with  $\alpha,\beta$ -unsaturated oxime **19** (26 mg, 0.10 mmol) and pentafluorostyrene (**2r**), purification by flash column chromatography (hexane : AcOEt = 10 : 1) afforded the title compound (pale yellow solid, 36 mg, 91% yield).

**1.0 mmol scale synthesis:** Following the general procedure A for pyridine synthesis with  $\alpha,\beta$ -unsaturated oxime **19** (259 mg, 1.0 mmol) and pentafluorostyrene (**2r**), purification by flash column chromatography (hexane : AcOEt = 10 : 1) afforded the title compound (pale yellow solid, 290 mg, 74% yield).  $^1H$  NMR ( $CDCl_3$ , 300 MHz)  $\delta$  7.46 (d, 2H,  $J = 8.7$  Hz), 7.25 (s, 1H), 7.01 (d, 2H,  $J = 8.1$  Hz), 3.87 (s, 3H), 3.20–3.09 (m, 4H), 2.21–2.15 (m, 2H).  $^{13}C\{^1H\}$  NMR ( $CDCl_3$ , 75 MHz)  $\delta$  167.3, 160.0, 146.3 (m), 145.6, 144.6, 142.9 (m), 139.3 (m), 136.1 (m), 134.9, 130.2, 129.5, 122.7, 115.9

(m), 114.2, 55.4, 34.6, 31.0, 23.4; HRMS (EI-quadrupole)  $m/z$ :  $[M]^+$  Calcd for  $C_{21}H_{14}F_5NO$ , 391.0996; found, 391.1001.

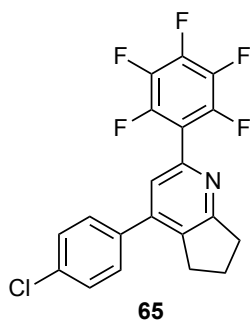

4-(4-chlorophenyl)-2-(perfluorophenyl)-6,7-dihydro-5H-cyclopenta[*b*]pyridine (**65**): Following the general procedure A for pyridine synthesis with  $\alpha,\beta$ -unsaturated oxime **20** (26 mg, 0.10 mmol) and pentafluorostyrene (**2r**), purification by flash column chromatography (hexane : AcOEt = 4 : 1) afforded the title compound (pale yellow solid, 37 mg, 93% yield).  $^1H$  NMR ( $CDCl_3$ , 300 MHz)  $\delta$  7.60–7.40 (m, 4H), 7.23 (s, 1H), 3.17 (t, 2H,  $J = 7.5$  Hz), 3.09 (t, 2H,  $J = 7.5$  Hz), 2.25–2.15 (m, 2H).  $^{13}C\{^1H\}$  NMR ( $CDCl_3$ , 75 MHz)  $\delta$  167.6, 146.2 (m), 144.8, 143.0 (m), 139.2 (m), 136.4, 136.1 (m), 135.2, 134.9, 129.5, 129.0, 122.7, 115.6 (m), 34.6, 30.8, 23.3; HRMS (EI-quadrupole)  $m/z$ :  $[M]^+$  Calcd for  $C_{20}H_{11}ClF_5N$ , 395.0500; found, 395.0503.

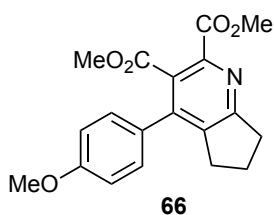

dimethyl 4-(4-methoxyphenyl)-6,7-dihydro-5H-cyclopenta[*b*]pyridine-2,3-dicarboxylate (**66**): Following the general procedure B for pyridine synthesis with  $\alpha,\beta$ -unsaturated oxime **19** (26 mg, 0.10 mmol) and dimethyl maleate (**2s**), purification by flash column chromatography (hexane : AcOEt = 1 : 1) afforded the title compound (colorless oil, 12 mg, 36% yield).  $^1H$  NMR ( $CDCl_3$ , 300 MHz)  $\delta$  7.22 (d, 2H,  $J = 9.0$  Hz), 6.95 (d, 2H,  $J = 9.0$  Hz), 3.99 (s, 3H), 3.85 (s, 3H), 3.68 (s, 3H), 3.18 (t, 2H,  $J = 7.2$  Hz), 2.86 (t, 2H,  $J = 7.5$  Hz), 2.20–2.10 (m, 2H).  $^{13}C\{^1H\}$  NMR ( $CDCl_3$ , 75 MHz)  $\delta$  168.3, 166.9, 165.6, 159.8, 144.5, 143.5, 140.1, 130.0, 129.5, 127.7, 113.9, 55.3, 53.2, 52.5, 34.7, 30.6, 23.0; HRMS (EI-quadrupole)  $m/z$ :  $[M]^+$  Calcd for  $C_{19}H_{19}NO_5$ , 341.1263; found, 341.1267.

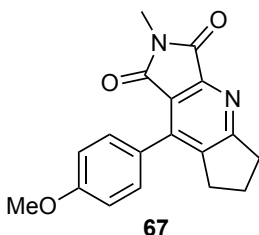

8-(4-methoxyphenyl)-2-methyl-6,7-dihydrocyclopenta[*b*]pyrrolo[3,4-*e*]pyridine-1,3(2*H*,5*H*)-dione (**67**): Following the general procedure B for pyridine synthesis with  $\alpha,\beta$ -unsaturated oxime **19** (52 mg, 0.20 mmol) and *N*-methylmaleimide (**2t**), purification by flash column chromatography (hexane : AcOEt = 2 : 1) afforded the title compound (white solid, 32 mg, 52% yield). <sup>1</sup>H NMR (CDCl<sub>3</sub>, 300 MHz)  $\delta$  7.40 (d, 2H, *J* = 9.0 Hz), 7.20 (d, 2H, *J* = 9.0 Hz), 3.89 (s, 3H), 3.23 (t, 2H, *J* = 7.8 Hz), 3.17 (s, 3H), 2.99 (t, 2H, *J* = 7.5 Hz), 2.22–2.16 (m, 2H). <sup>13</sup>C {<sup>1</sup>H} NMR (CDCl<sub>3</sub>, 75 MHz)  $\delta$  172.8, 166.8, 160.5, 151.8, 143.8, 141.1, 130.7, 124.7, 121.7, 113.6, 55.3, 34.8, 30.7, 23.8, 23.4; HRMS (EI-quadrupole) *m/z*: [M]<sup>+</sup> Calcd for C<sub>18</sub>H<sub>16</sub>N<sub>2</sub>O<sub>3</sub>, 308.1161; found, 308.1169.

### $\omega$ B97X-D/6-311+G(d,p) Calculated cartesian coordinates

6-membered  $\alpha,\beta$ -unsaturated oxime **36**

|   |            |            |            |
|---|------------|------------|------------|
| N | -2.4498067 | -0.5779425 | -0.0008641 |
| O | -3.8008942 | -0.7415300 | -0.3370266 |
| C | -4.2518757 | -2.0407414 | 0.0973405  |
| H | -3.4955222 | -2.7731817 | -0.2130472 |
| C | -5.5571246 | -2.2886869 | -0.6480961 |
| H | -5.4010911 | -2.2410819 | -1.7292994 |
| H | -5.9554733 | -3.2762538 | -0.3964858 |
| H | -6.3056246 | -1.5377674 | -0.3747898 |
| C | -4.4056279 | -2.0797881 | 1.6151445  |
| H | -3.4540875 | -1.8396837 | 2.0958579  |
| H | -5.1564826 | -1.3528525 | 1.9433083  |
| H | -4.7202169 | -3.0752194 | 1.9462681  |
| C | -2.0322546 | 0.6266512  | -0.2106002 |
| C | -0.5797720 | 0.8678899  | -0.0107465 |
| C | -2.9241148 | 1.7612737  | -0.6716958 |
| C | -0.1773584 | 2.2697199  | 0.4099645  |
| C | -2.5006173 | 3.1224356  | -0.1008374 |
| H | -2.8764758 | 1.7992434  | -1.7701767 |
| H | -3.9594358 | 1.5262409  | -0.4176857 |
| C | -1.0025319 | 3.3599836  | -0.2946245 |
| H | 0.8863489  | 2.4255132  | 0.2134671  |
| H | -0.3152784 | 2.3835162  | 1.4967019  |

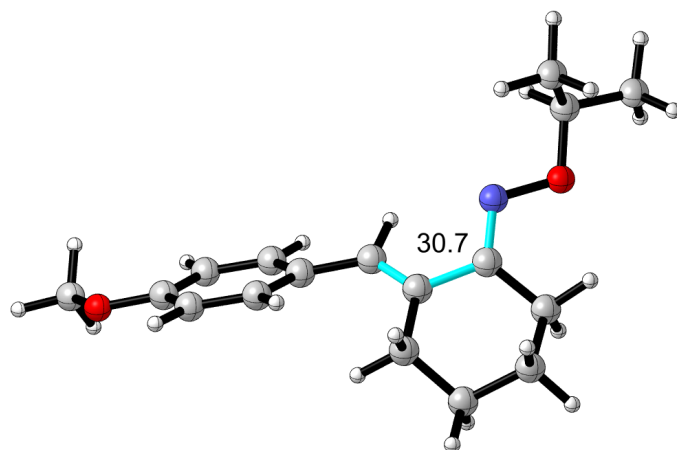

|   |            |            |            |
|---|------------|------------|------------|
| H | -3.0867055 | 3.9163782  | -0.5776835 |
| H | -2.7375356 | 3.1591209  | 0.9712329  |
| H | -0.7133694 | 4.3435539  | 0.0933556  |
| H | -0.7660614 | 3.3605743  | -1.3672823 |
| C | 0.2904112  | -0.1435593 | -0.2506952 |
| H | -0.1450503 | -1.0527308 | -0.6592065 |
| C | 1.7445609  | -0.1959332 | -0.0640935 |
| C | 2.5018049  | -1.0239655 | -0.9108239 |
| C | 2.4451153  | 0.4911981  | 0.9510959  |
| C | 3.8861417  | -1.1381313 | -0.7980756 |
| H | 1.9912341  | -1.5879004 | -1.6871175 |
| C | 3.8218791  | 0.3836221  | 1.0818100  |
| H | 1.8989889  | 1.0892371  | 1.6715227  |
| C | 4.5573574  | -0.4238947 | 0.2020495  |
| H | 4.4246856  | -1.7826670 | -1.4825526 |
| H | 4.3535420  | 0.9064679  | 1.8701189  |
| O | 5.9052781  | -0.4573844 | 0.4118649  |
| C | 6.6974117  | -1.2693556 | -0.4406987 |
| H | 7.7270839  | -1.1469469 | -0.1017890 |
| H | 6.4173190  | -2.3280038 | -0.3675615 |
| H | 6.6223518  | -0.9509514 | -1.4883176 |

7-membered  $\alpha,\beta$ -unsaturated oxime **37**

|   |           |            |            |
|---|-----------|------------|------------|
| N | 2.3180980 | -0.6950266 | 0.2827514  |
| O | 3.6573869 | -0.9720668 | -0.0474627 |
| C | 4.0784800 | -2.1803356 | 0.6171177  |
| H | 3.7566614 | -2.1134710 | 1.6643107  |
| C | 5.5999894 | -2.1784512 | 0.5382660  |
| H | 6.0115116 | -1.2808950 | 1.0081680  |
| H | 6.0074457 | -3.0565900 | 1.0483444  |
| H | 5.9315246 | -2.2037743 | -0.5049554 |
| C | 3.4430739 | -3.4057716 | -0.0339437 |
| H | 2.3537214 | -3.3302356 | 0.0048682  |
| H | 3.7513325 | -3.4857539 | -1.0819891 |
| H | 3.7455280 | -4.3207287 | 0.4865670  |
| C | 1.8794075 | 0.3532370  | -0.3258586 |

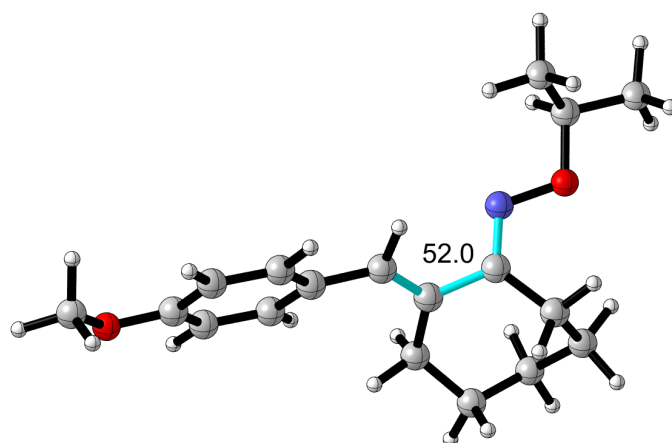

|   |            |            |            |
|---|------------|------------|------------|
| C | 0.4574224  | 0.7168363  | -0.0691687 |
| C | 2.6937565  | 1.1949065  | -1.2828829 |
| C | 0.1394390  | 2.1335726  | 0.3873053  |
| C | 3.4194942  | 2.3722285  | -0.5994091 |
| H | 2.0152239  | 1.5804409  | -2.0507324 |
| H | 3.4241954  | 0.5528500  | -1.7803426 |
| C | 1.0593088  | 3.2931923  | -0.0560671 |
| H | 0.1426440  | 2.1369396  | 1.4888021  |
| H | -0.8865052 | 2.3755640  | 0.0909209  |
| C | 2.5300527  | 3.1575088  | 0.3840731  |
| H | 3.7863246  | 3.0435486  | -1.3858378 |
| H | 4.3011878  | 1.9935539  | -0.0721461 |
| H | 0.9980273  | 3.4400095  | -1.1419141 |
| H | 0.6377471  | 4.2024372  | 0.3883442  |
| H | 2.9645109  | 4.1531119  | 0.5318977  |
| H | 2.5540478  | 2.6706605  | 1.3678997  |
| C | -0.4730123 | -0.2512767 | -0.2425450 |
| H | -0.0969833 | -1.2022522 | -0.6139276 |
| C | -1.9297208 | -0.2221892 | -0.0509590 |
| C | -2.7210646 | -1.0753915 | -0.8396694 |
| C | -2.6027705 | 0.5674031  | 0.9061158  |
| C | -4.1091542 | -1.1224243 | -0.7268334 |
| H | -2.2340114 | -1.7159440 | -1.5704086 |
| C | -3.9837165 | 0.5275605  | 1.0368468  |
| H | -2.0370512 | 1.1956461  | 1.5832518  |
| C | -4.7514980 | -0.3096350 | 0.2152677  |
| H | -4.6729485 | -1.7914775 | -1.3659418 |
| H | -4.4937886 | 1.1303356  | 1.7811329  |
| O | -6.1003613 | -0.2698463 | 0.4194087  |
| C | -6.9245567 | -1.1073139 | -0.3760387 |
| H | -6.6904188 | -2.1688128 | -0.2244587 |
| H | -7.9488732 | -0.9167552 | -0.0526824 |
| H | -6.8335291 | -0.8698565 | -1.4437008 |

## Crystallographic description of 2-benzylidenecyclopentenone oxime ether (**18**)

CCDC-2166741 for 2-benzylidenecyclopentenone oxime ether (**18**) contains the supplementary crystallographic data for this paper. These data can be obtained free of charge from The Cambridge Crystallographic Data Centre via [www.ccdc.cam.ac.uk/data\\_request/cif](http://www.ccdc.cam.ac.uk/data_request/cif).

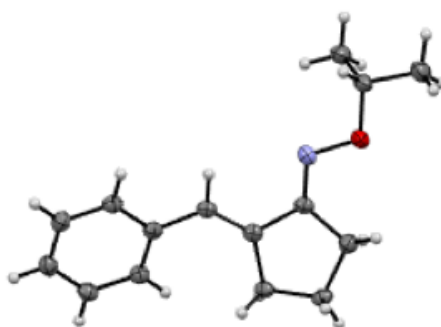

**Figure S1.** ORTEP view of oxime **18**.

## References

- 1) T. Yamada, Y. Hashimoto, K. Tanaka. III, N. Morita, O. Tamura, *Org. Lett.* **2021**, *23*, 1659–1663.
- 2) M. J. Frisch, G. W. Trucks, H. B. Schlegel, G. E. Scuseria, M. A. Robb, J. R. Cheeseman, G. Scalmani, V. Barone, G. A. Petersson, H. Nakatsuji, X. Li, M. Caricato, A. Marenich, J. Bloino, B. G. Janesko, R. Gomperts, B. Mennucci, H. P. Hratchian, J. V. Ortiz, A. F. Izmaylov, J. L. Sonnenberg, D. Williams-Young, F. Ding, F. Lipparini, F. Egidi, J. Goings, B. Peng, A. Petrone, T. Henderson, D. Ranasinghe, V. G. Zakrzewski, J. Gao, N. Rega, G. Zheng, W. Liang, M. Hada, M. Ehara, K. Toyota, R. Fukuda, J. Hasegawa, M. Ishida, T. Nakajima, Y. Honda, O. Kitao, H. Nakai, T. Vreven, K. Throssell, J. A. Montgomery, Jr., J. E. Peralta, F. Ogliaro, M. Bearpark, J. J. Heyd, E. Brothers, K. N. Kudin, V. N. Staroverov, T. Keith, R. Kobayashi, J. Normand, K. Raghavachari, A. Rendell, J. C. Burant, S. S. Iyengar, J. Tomasi, M. Cossi, J. M. Millam, M. Klene, C. Adamo, R. Cammi, J. W. Ochterski, R. L. Martin, K. Morokuma, O. Farkas, J. B. Foresman, and D. J. Fox, Gaussian 09 Revision D.01; Gaussian, Inc.; Wallingford CT, **2013**.
- 3) a) J. M. Neely, T. Rovis, *J. Am. Chem. Soc.* **2013**, *135*, 66–69. b) S. Tang, J. He, Y. Sun, L. He, X. She. *Org. Lett.* **2009**, *11*, 3982–3985.

<sup>1</sup>H-NMR of L8 (300 MHz, CDCl<sub>3</sub>)

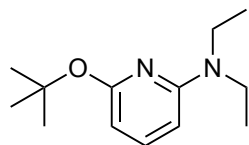

L8

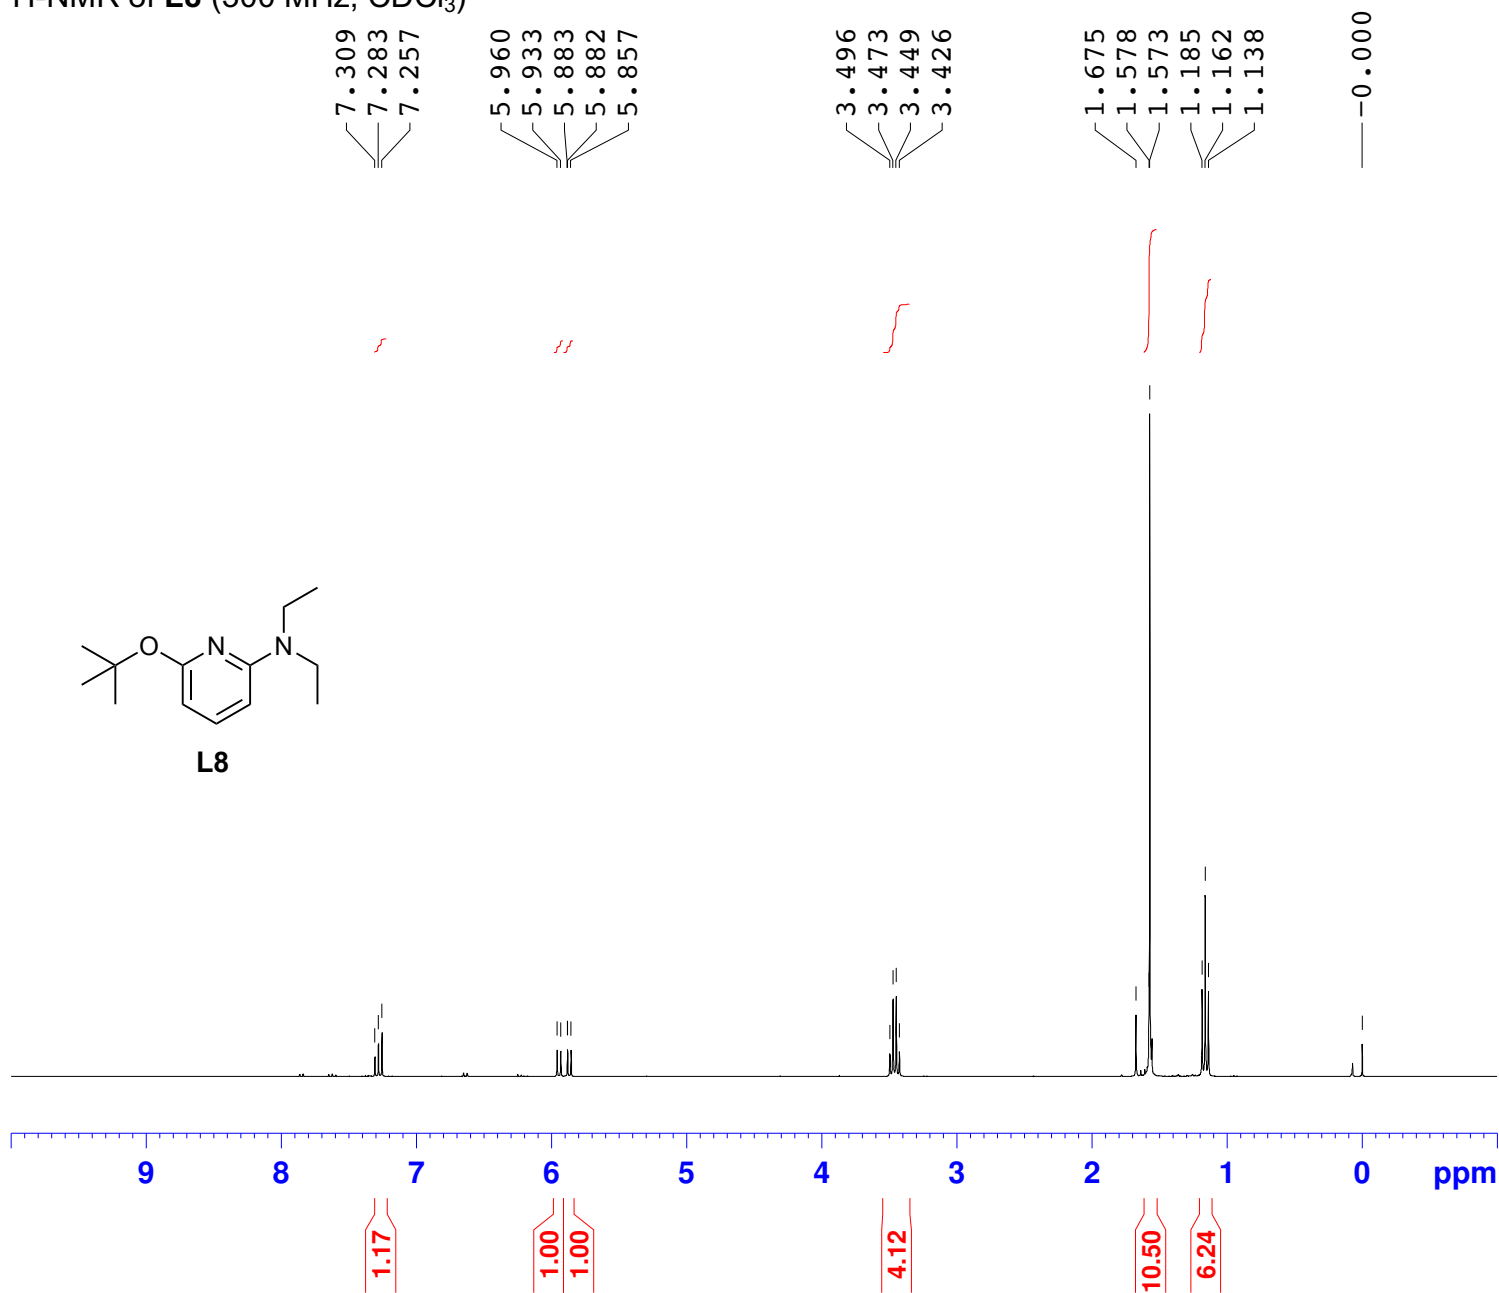

Current Data Parameters  
 NAME Yakka\_Yamada\_2  
 EXPNO 4440  
 PROCNO 1

F2 - Acquisition Parameters  
 Date\_ 20210313  
 Time\_ 12.15  
 INSTRUM spect  
 PROBHD 5 mm PABBO BB-  
 PULPROG zg30  
 TD 65536  
 SOLVENT CDCl3  
 NS 16  
 DS 2  
 SWH 6188.119 Hz  
 FIDRES 0.094423 Hz  
 AQ 5.2953086 sec  
 RG 50.8  
 DW 80.800 usec  
 DE 6.50 usec  
 TE 294.5 K  
 D1 1.00000000 sec  
 TD0 1

==== CHANNEL f1 =====  
 SF01 300.1318534 MHz  
 NUC1 1H  
 P1 15.00 usec  
 PLW1 6.19999981 W

F2 - Processing parameters  
 SI 32768  
 SF 300.1300074 MHz  
 WDW EM  
 SSB 0  
 LB 0.30 Hz  
 GB 0  
 PC 1.00



<sup>13</sup>C-NMR of L8 (75 MHz, CDCl<sub>3</sub>)

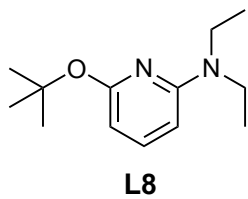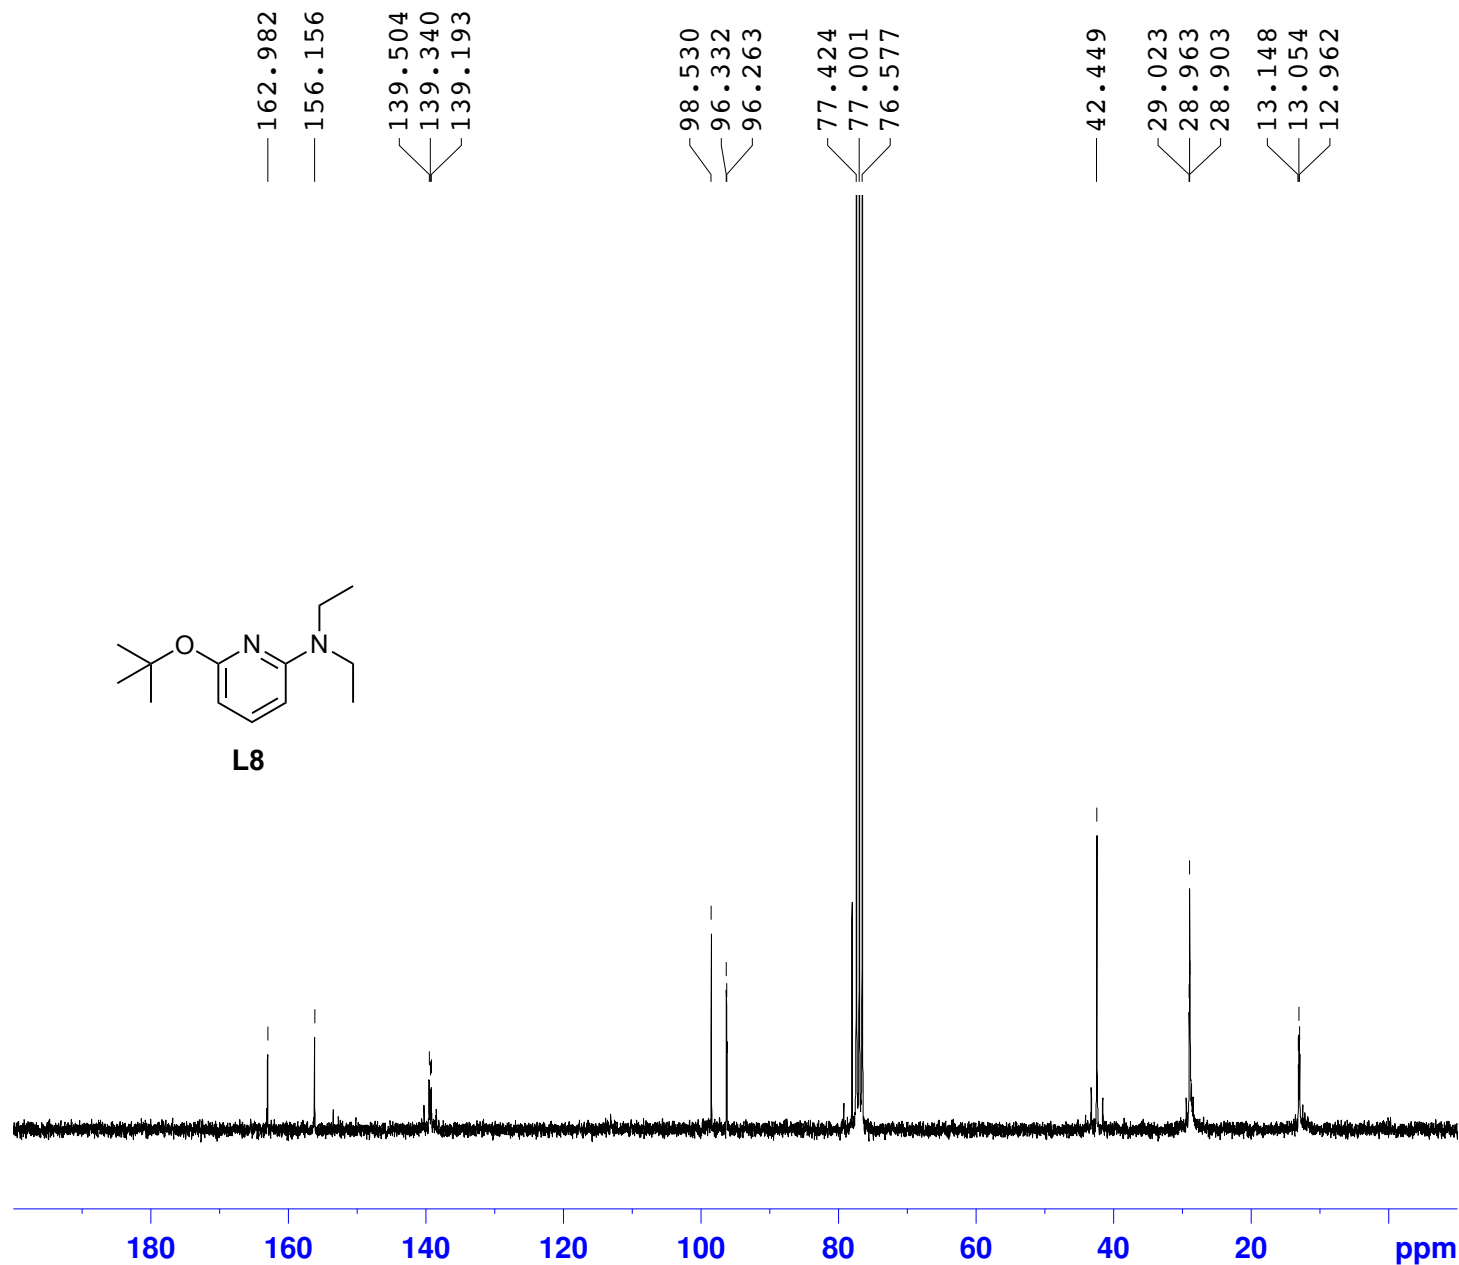

Current Data Parameters  
 NAME Yakka\_Yamada\_2  
 EXPNO 4441  
 PROCNO 1

F2 - Acquisition Parameters  
 Date\_ 20210314  
 Time\_ 17.53  
 INSTRUM spect  
 PROBHD 5 mm PABBO BB-  
 PULPROG zgpg30  
 TD 65536  
 SOLVENT CDCl3  
 NS 4096  
 DS 4  
 SWH 18028.846 Hz  
 FIDRES 0.275098 Hz  
 AQ 1.8175317 sec  
 RG 2050  
 DW 27.733 usec  
 DE 6.50 usec  
 TE 295.6 K  
 D1 2.00000000 sec  
 D11 0.03000000 sec  
 TD0 1

===== CHANNEL f1 =====  
 SFO1 75.4752953 MHz  
 NUC1 13C  
 P1 10.00 usec  
 PLW1 34.50000000 W

===== CHANNEL f2 =====  
 SFO2 300.1312005 MHz  
 NUC2 1H  
 CPDPRG[2] waltz16  
 PCPD2 80.00 usec  
 PLW2 6.19999981 W  
 PLW12 0.21797000 W  
 PLW13 0.13950001 W

F2 - Processing parameters  
 SI 32768  
 SF 75.4677505 MHz  
 WDW EM  
 SSB 0  
 LB 1.00 Hz  
 GB 0  
 PC 1.40

<sup>1</sup>H-NMR of **1f** (300 MHz, CDCl<sub>3</sub>)

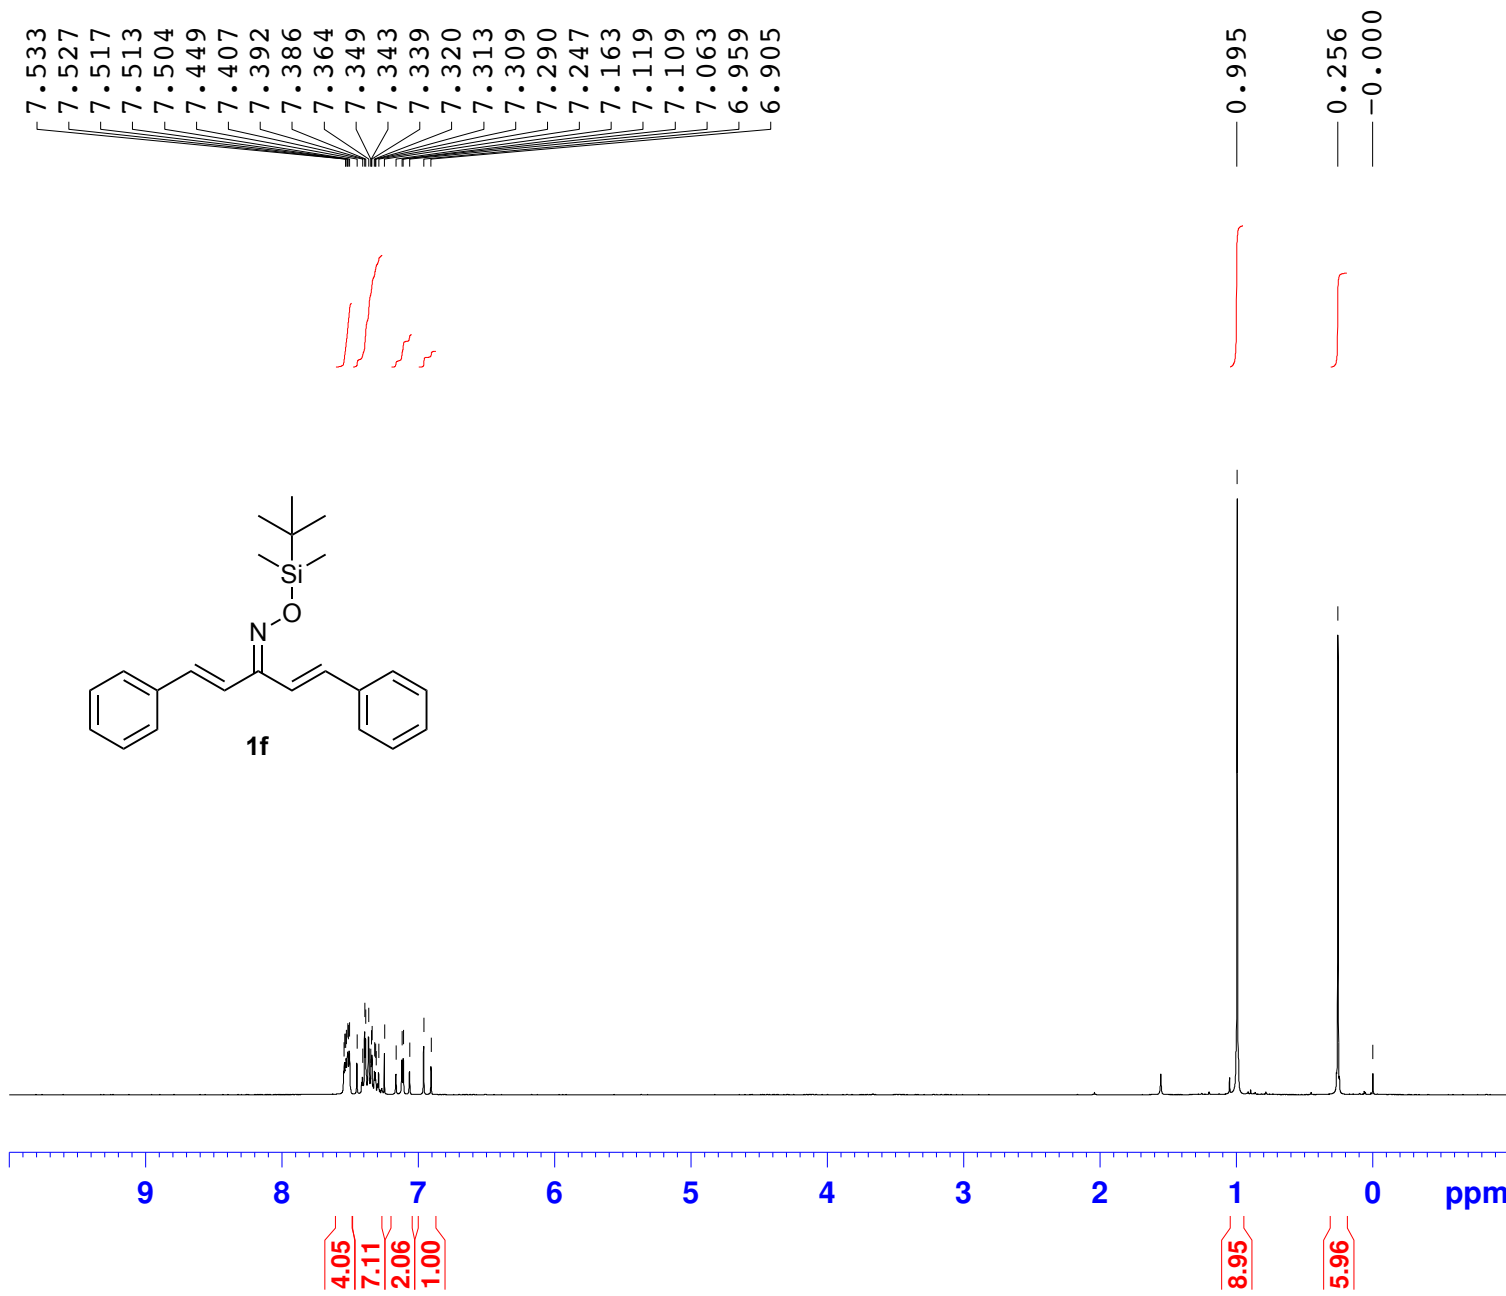

```

Current Data Parameters
NAME      Yakka_Yamada_2
EXPNO     1400
PROCNO    1

F2 - Acquisition Parameters
Date_     20191226
Time      20.32
INSTRUM   spect
PROBHD    5 mm PABBO BB-
PULPROG   zg30
TD         65536
SOLVENT   CDCl3
NS         16
DS         2
SWH        6188.119 Hz
FIDRES     0.094423 Hz
AQ         5.2953086 sec
RG         40.3
DW         80.800 usec
DE         6.50 usec
TE         294.4 K
D1         1.00000000 sec
TD0        1

===== CHANNEL f1 =====
SFO1      300.1318534 MHz
NUC1       1H
P1         15.00 usec
PLW1      6.19999981 W

F2 - Processing parameters
SI         32768
SF         300.1300108 MHz
WDW        EM
SSB        0
LB         0.30 Hz
GB         0
PC         1.00
    
```

<sup>13</sup>C-NMR of **1f** (75 MHz, CDCl<sub>3</sub>)

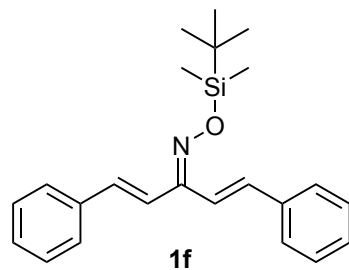

158.262  
136.700  
136.604  
136.557  
134.522  
128.817  
128.766  
128.674  
128.319  
127.220  
126.975  
122.839  
117.717

77.424  
77.001  
76.577

26.154  
18.230

-5.128

Current Data Parameters  
NAME Yakka\_Yamada\_2  
EXPNO 1402  
PROCNO 1

F2 - Acquisition Parameters  
Date\_ 20191228  
Time 4.27  
INSTRUM spect  
PROBHD 5 mm PABBO BB-  
PULPROG zgpg30  
TD 65536  
SOLVENT CDCl3  
NS 2048  
DS 4  
SWH 18028.846 Hz  
FIDRES 0.275098 Hz  
AQ 1.8175317 sec  
RG 2050  
DW 27.733 usec  
DE 6.50 usec  
TE 295.9 K  
D1 2.0000000 sec  
D11 0.0300000 sec  
TD0 1

===== CHANNEL f1 =====  
SFO1 75.4752953 MHz  
NUC1 13C  
P1 10.00 usec  
PLW1 34.0000000 W

===== CHANNEL f2 =====  
SFO2 300.1312005 MHz  
NUC2 1H  
CPDPRG[2] waltz16  
PCPD2 80.00 usec  
PLW2 6.19999981 W  
PLW12 0.21797000 W  
PLW13 0.13950001 W

F2 - Processing parameters  
SI 32768  
SF 75.4677510 MHz  
WDW EM  
SSB 0  
LB 1.00 Hz  
GB 0  
PC 1.40

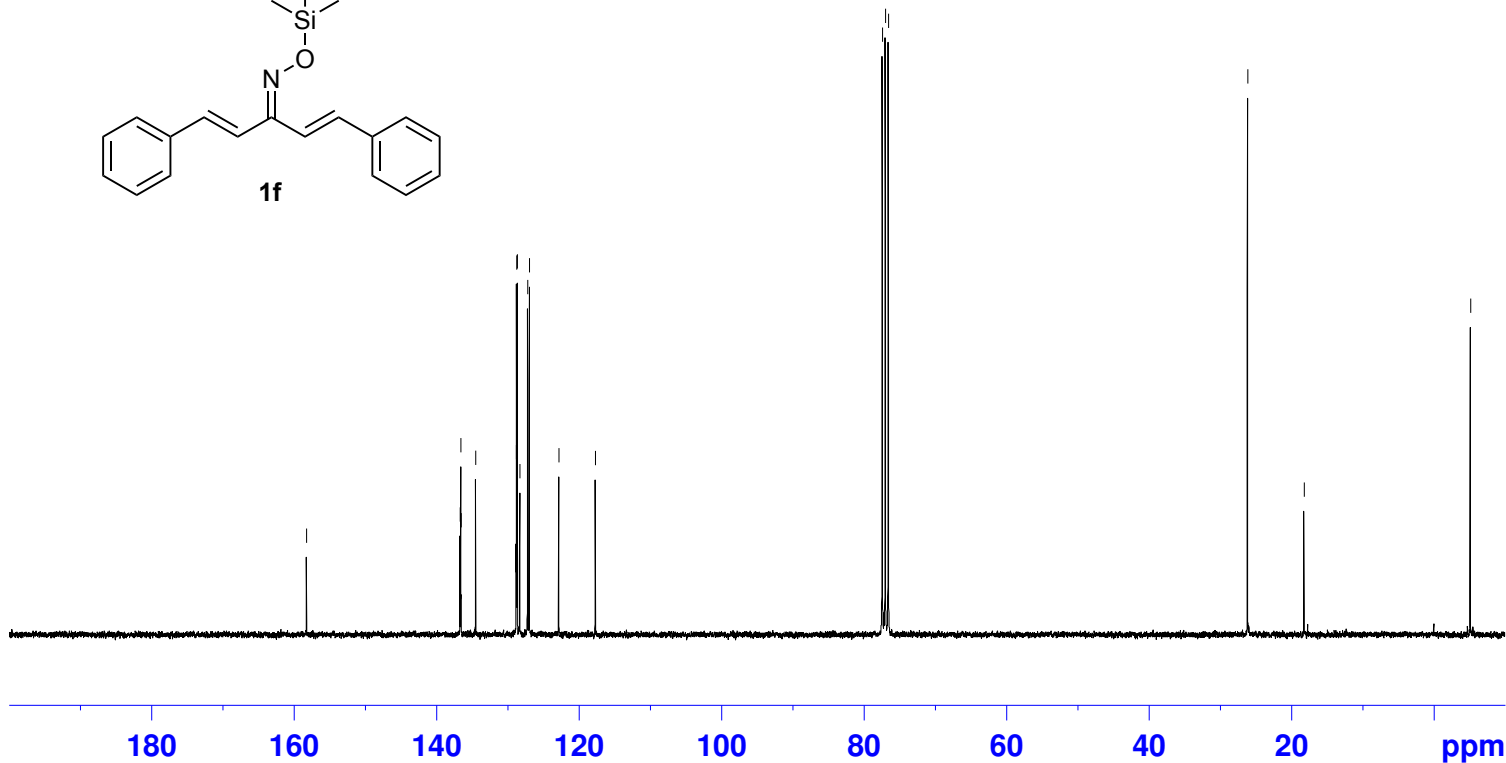

<sup>1</sup>H-NMR of **1g** (300 MHz, CDCl<sub>3</sub>)

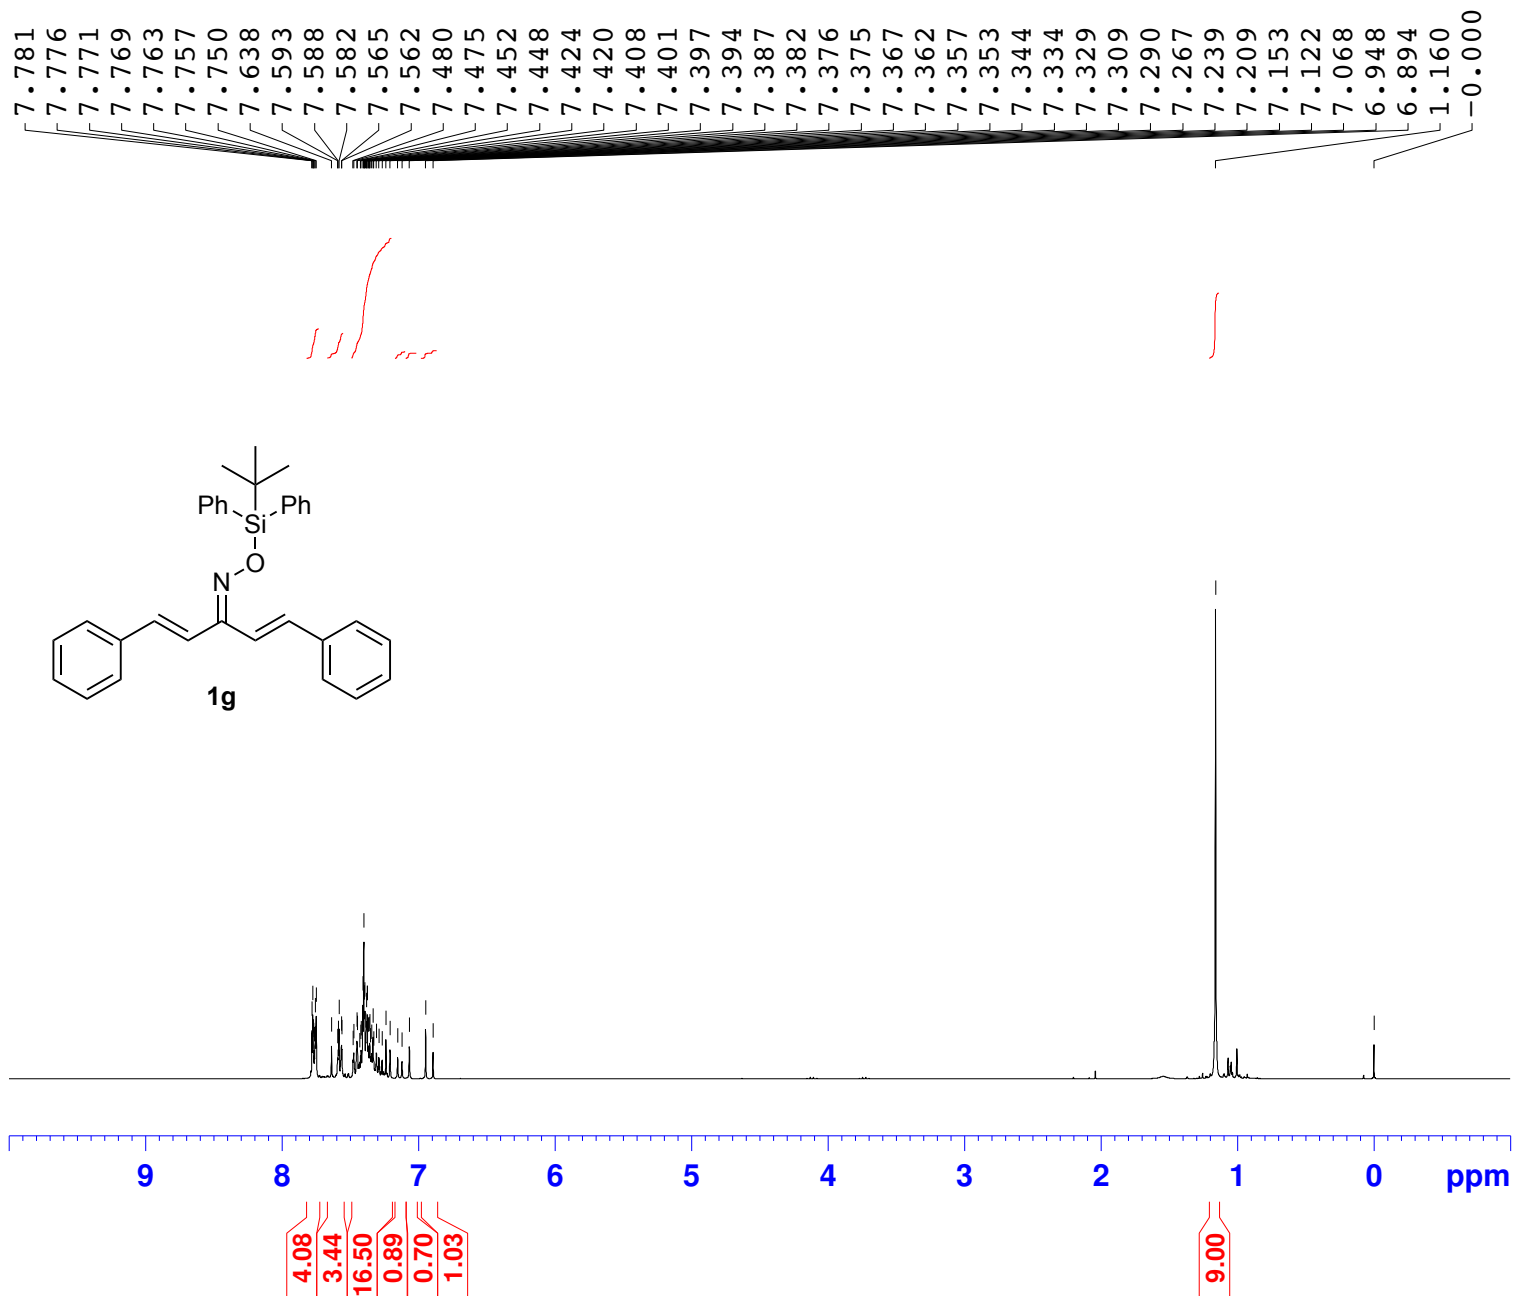

Current Data Parameters  
 NAME Yakka\_Yamada 2  
 EXPNO 1380  
 PROCNO 1

F2 - Acquisition Parameters  
 Date\_ 20191226  
 Time\_ 20.17  
 INSTRUM spect  
 PROBHD 5 mm PABBO BB-  
 PULPROG zg30  
 TD 65536  
 SOLVENT CDCl3  
 NS 16  
 DS 2  
 SWH 6188.119 Hz  
 FIDRES 0.094423 Hz  
 AQ 5.2953086 sec  
 RG 45.2  
 DW 80.800 usec  
 DE 6.50 usec  
 TE 294.4 K  
 D1 1.00000000 sec  
 TD0 1

==== CHANNEL f1 =====  
 SFO1 300.1318534 MHz  
 NUC1 1H  
 P1 15.00 usec  
 PLW1 6.19999981 W

F2 - Processing parameters  
 SI 32768  
 SF 300.1300129 MHz  
 WDW EM  
 SSB 0  
 LB 0.30 Hz  
 GB 0  
 PC 1.00

<sup>13</sup>C-NMR of **1g** (75 MHz, CDCl<sub>3</sub>)

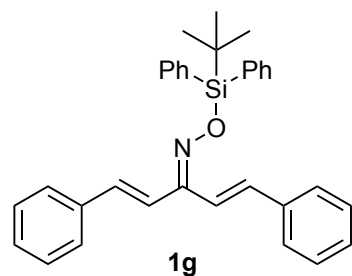

159.041  
137.131  
136.562  
136.461  
135.526  
135.068  
133.645  
129.646  
128.978  
128.852  
128.660  
128.392  
127.603  
127.274  
127.000  
122.700  
117.609

77.426  
77.003  
76.579

27.174  
19.502

Current Data Parameters  
NAME Yakka\_Yamada\_2  
EXPNO 1382  
PROCNO 1

F2 - Acquisition Parameters  
Date\_ 20191227  
Time\_ 7.36  
INSTRUM spect  
PROBHD 5 mm PABBO BB-  
PULPROG zgpg30  
TD 65536  
SOLVENT CDCl3  
NS 2048  
DS 4  
SWH 18028.846 Hz  
FIDRES 0.275098 Hz  
AQ 1.8175317 sec  
RG 2050  
DW 27.733 usec  
DE 6.50 usec  
TE 295.9 K  
D1 2.00000000 sec  
D11 0.03000000 sec  
TD0 1

==== CHANNEL f1 =====  
SFO1 75.4752953 MHz  
NUC1 13C  
P1 10.00 usec  
PLW1 34.00000000 W

==== CHANNEL f2 =====  
SFO2 300.1312005 MHz  
NUC2 1H  
CPDPRG[2] waltz16  
PCPD2 80.00 usec  
PLW2 6.19999981 W  
PLW12 0.21797000 W  
PLW13 0.13950001 W

F2 - Processing parameters  
SI 32768  
SF 75.4677514 MHz  
WDW EM  
SSB 0  
LB 1.00 Hz  
GB 0  
PC 1.40

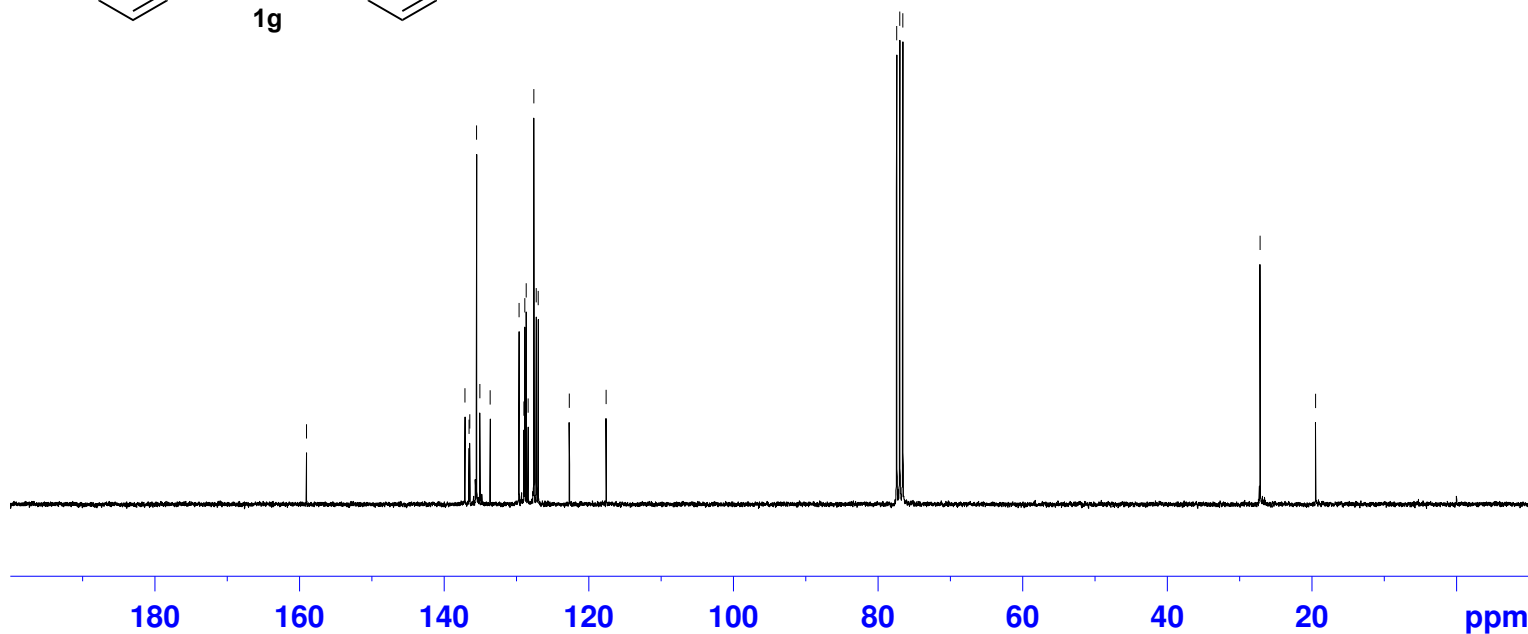

<sup>1</sup>H-NMR of **1h** (300 MHz, CDCl<sub>3</sub>)

7.521  
7.516  
7.513  
7.505  
7.494  
7.438  
7.408  
7.392  
7.386  
7.385  
7.380  
7.364  
7.359  
7.346  
7.341  
7.318  
7.311  
7.287  
7.250  
7.157  
7.130  
7.103  
7.074  
6.952  
6.898

1.364  
1.344  
1.338  
1.321  
1.315  
1.311  
1.296  
1.288  
1.265  
1.244  
1.146  
1.123  
-0.000

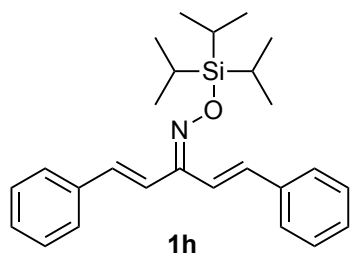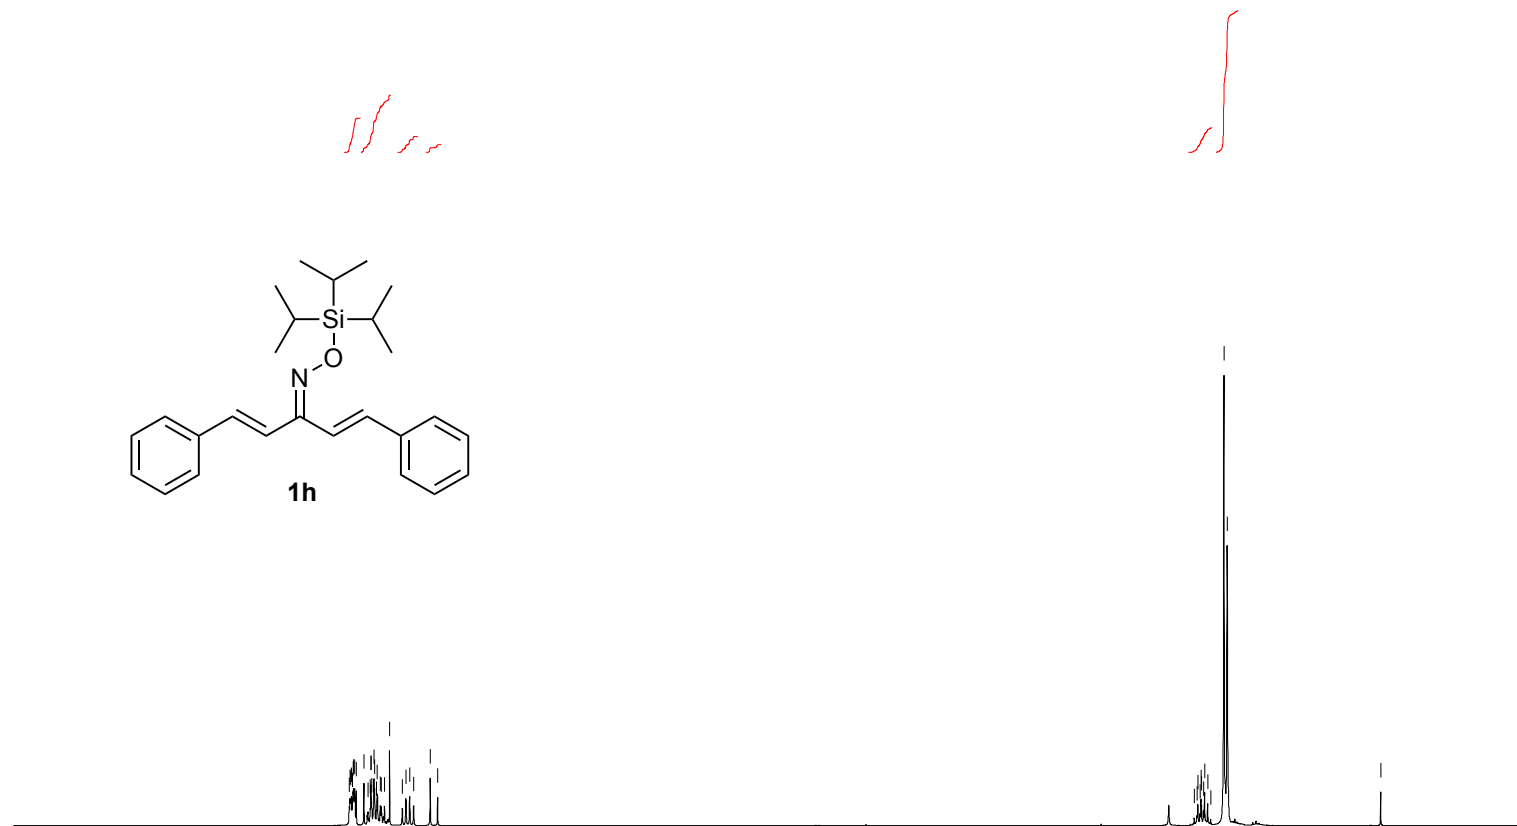

4.47  
7.42  
2.07  
1.00

3.20  
18.35

Current Data Parameters  
NAME Yakka\_Yamada\_2  
EXPNO 1390  
PROCNO 1

F2 - Acquisition Parameters  
Date\_ 20191226  
Time 20.24  
INSTRUM spect  
PROBHD 5 mm PABBO BB-  
PULPROG zg30  
TD 65536  
SOLVENT CDCl3  
NS 16  
DS 2  
SWH 6188.119 Hz  
FIDRES 0.094423 Hz  
AQ 5.2953086 sec  
RG 45.2  
DW 80.800 usec  
DE 6.50 usec  
TE 294.4 K  
D1 1.00000000 sec  
TD0 1

==== CHANNEL f1 =====  
SFO1 300.1318534 MHz  
NUC1 1H  
P1 15.00 usec  
PLW1 6.19999981 W

F2 - Processing parameters  
SI 32768  
SF 300.1300097 MHz  
WDW EM  
SSB 0  
LB 0.30 Hz  
GB 0  
PC 1.00

<sup>13</sup>C-NMR of **1h** (75 MHz, CDCl<sub>3</sub>)

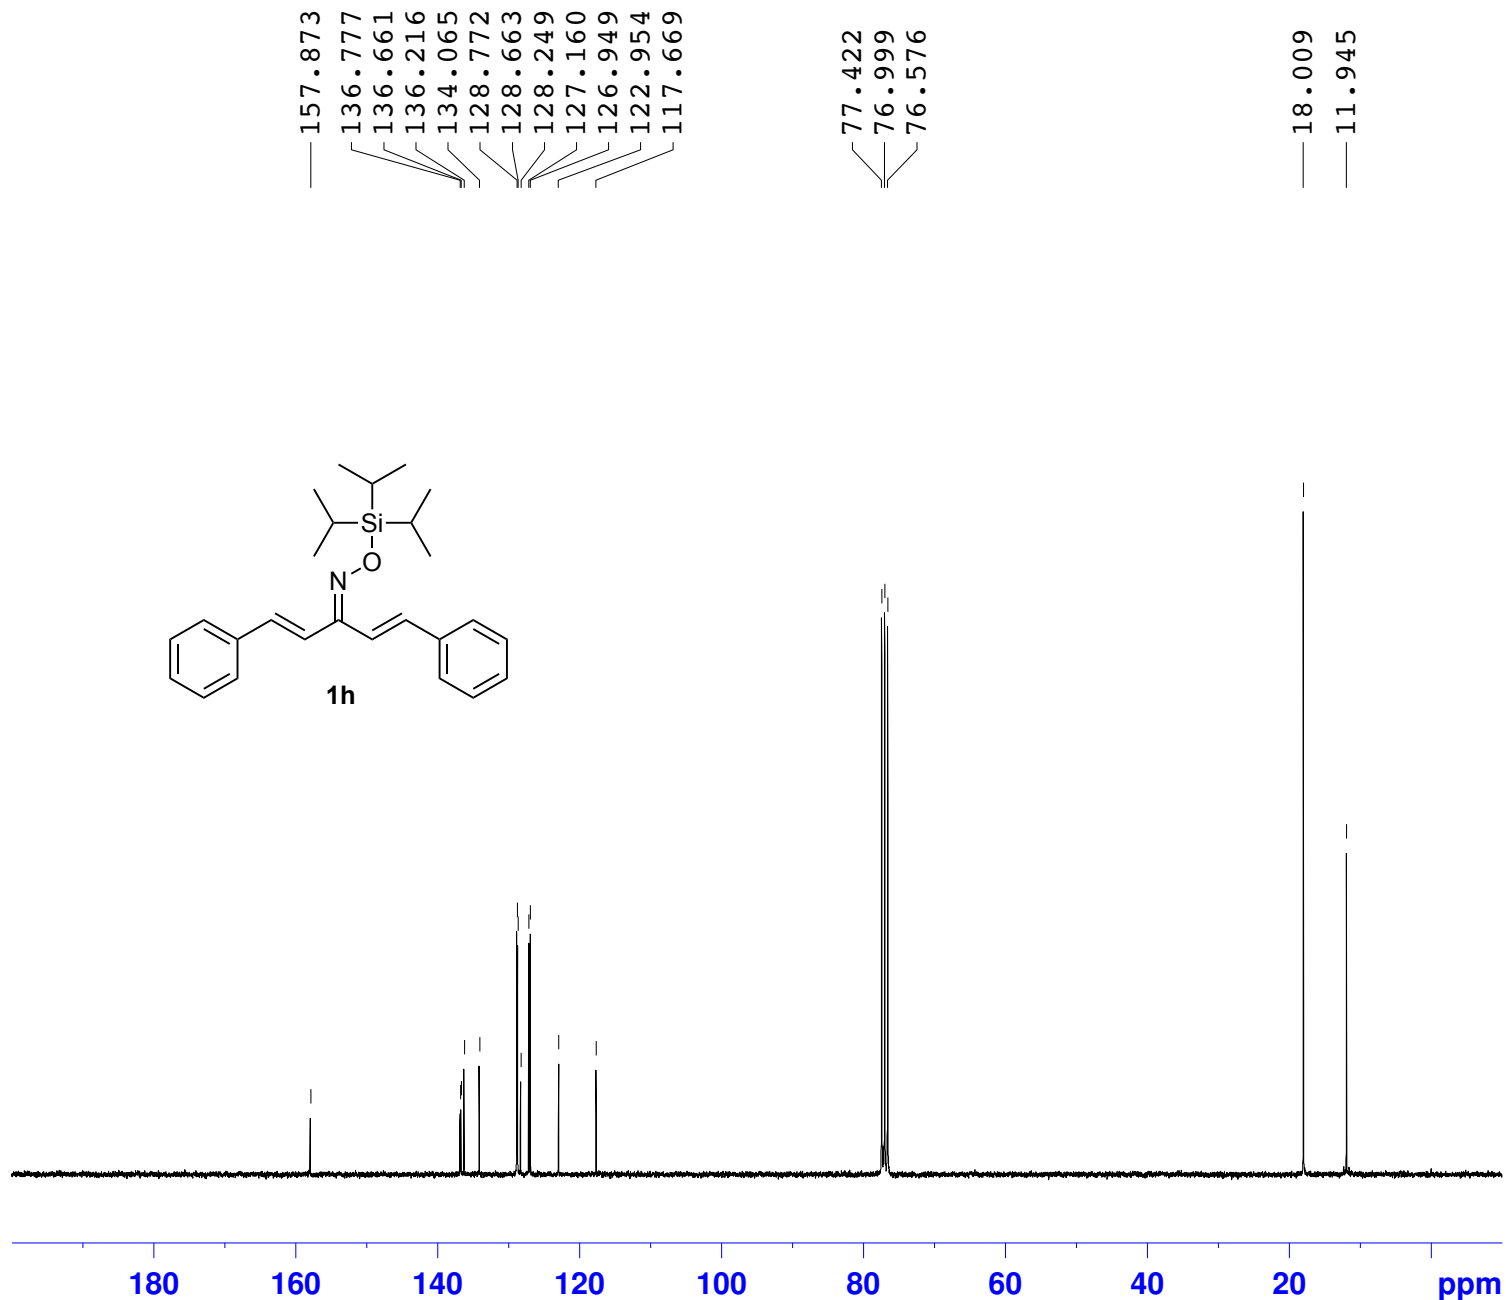

Current Data Parameters  
 NAME Yakka\_Yamada\_2  
 EXPNO 1392  
 PROCNO 1

F2 - Acquisition Parameters  
 Date\_ 20191228  
 Time 1.54  
 INSTRUM spect  
 PROBHD 5 mm PABBO BB-  
 PULPROG zgpg30  
 TD 65536  
 SOLVENT CDCl3  
 NS 2048  
 DS 4  
 SWH 18028.846 Hz  
 FIDRES 0.275098 Hz  
 AQ 1.8175317 sec  
 RG 2050  
 DW 27.733 usec  
 DE 6.50 usec  
 TE 296.0 K  
 D1 2.00000000 sec  
 D11 0.03000000 sec  
 TD0 1

==== CHANNEL f1 =====  
 SFO1 75.4752953 MHz  
 NUC1 13C  
 P1 10.00 usec  
 PLW1 34.00000000 W

==== CHANNEL f2 =====  
 SFO2 300.1312005 MHz  
 NUC2 1H  
 CPDPRG[2] waltz16  
 PCPD2 80.00 usec  
 PLW2 6.19999981 W  
 PLW12 0.21797000 W  
 PLW13 0.13950001 W

F2 - Processing parameters  
 SI 32768  
 SF 75.4677508 MHz  
 WDW EM  
 SSB 0  
 LB 1.00 Hz  
 GB 0  
 PC 1.40

<sup>1</sup>H-NMR of **1i** (300 MHz, CDCl<sub>3</sub>)

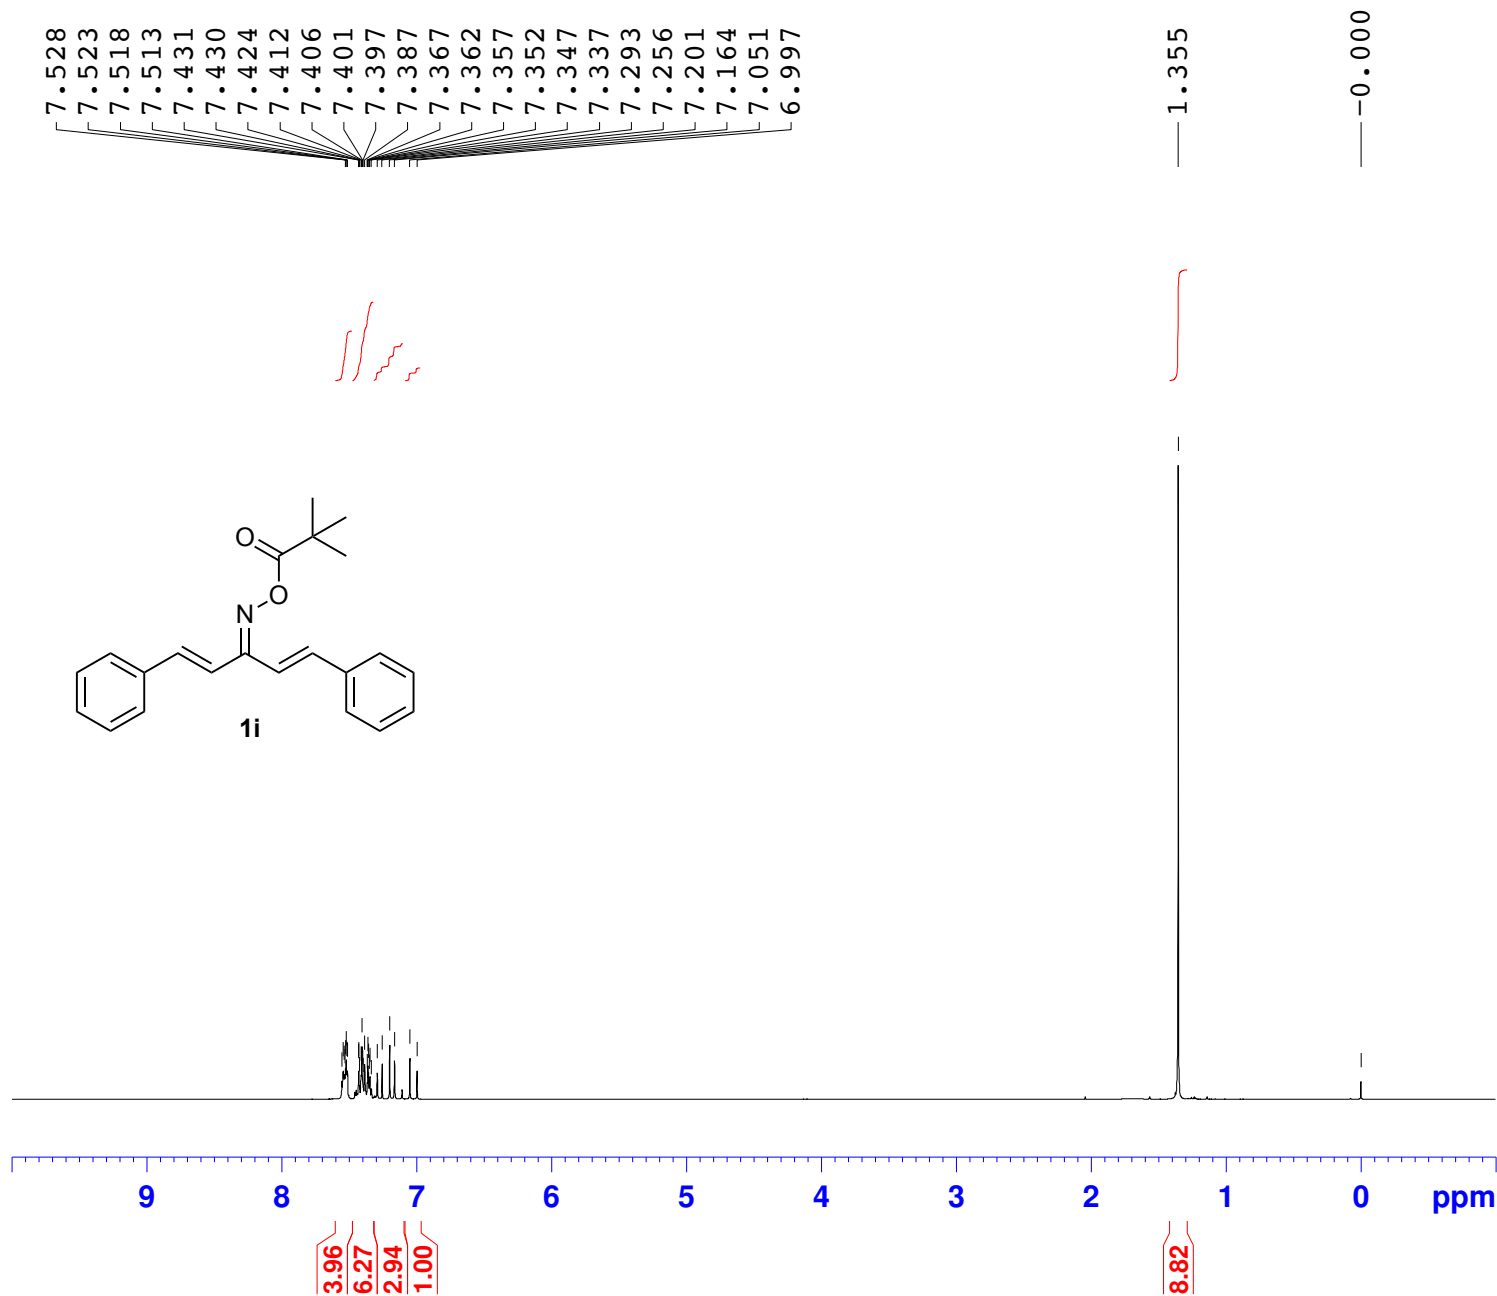

Current Data Parameters  
 NAME Yakka\_Yamada\_2  
 EXPNO 1350  
 PROCNO 1

F2 - Acquisition Parameters  
 Date\_ 20191226  
 Time 19.54  
 INSTRUM spect  
 PROBHD 5 mm PABBO BB-  
 PULPROG zg30  
 TD 65536  
 SOLVENT CDCl3  
 NS 16  
 DS 2  
 SWH 6188.119 Hz  
 FIDRES 0.094423 Hz  
 AQ 5.2953086 sec  
 RG 45.2  
 DW 80.800 usec  
 DE 6.50 usec  
 TE 294.4 K  
 D1 1.00000000 sec  
 TD0 1

==== CHANNEL f1 =====  
 SFO1 300.1318534 MHz  
 NUC1 1H  
 P1 15.00 usec  
 PLW1 6.19999981 W

F2 - Processing parameters  
 SI 32768  
 SF 300.1300078 MHz  
 WDW EM  
 SSB 0  
 LB 0.30 Hz  
 GB 0  
 PC 1.00



<sup>13</sup>C-NMR of **1i** (75 MHz, CDCl<sub>3</sub>)

— 174.941  
 — 161.105  
 139.778  
 138.889  
 135.798  
 135.441  
 129.715  
 129.174  
 128.996  
 128.808  
 127.387  
 127.342  
 120.923  
 116.788

77.420  
 76.996  
 76.572

— 38.871

— 27.323

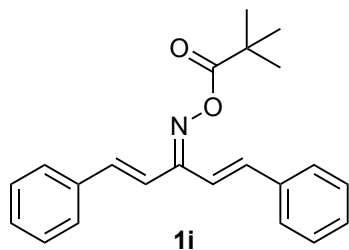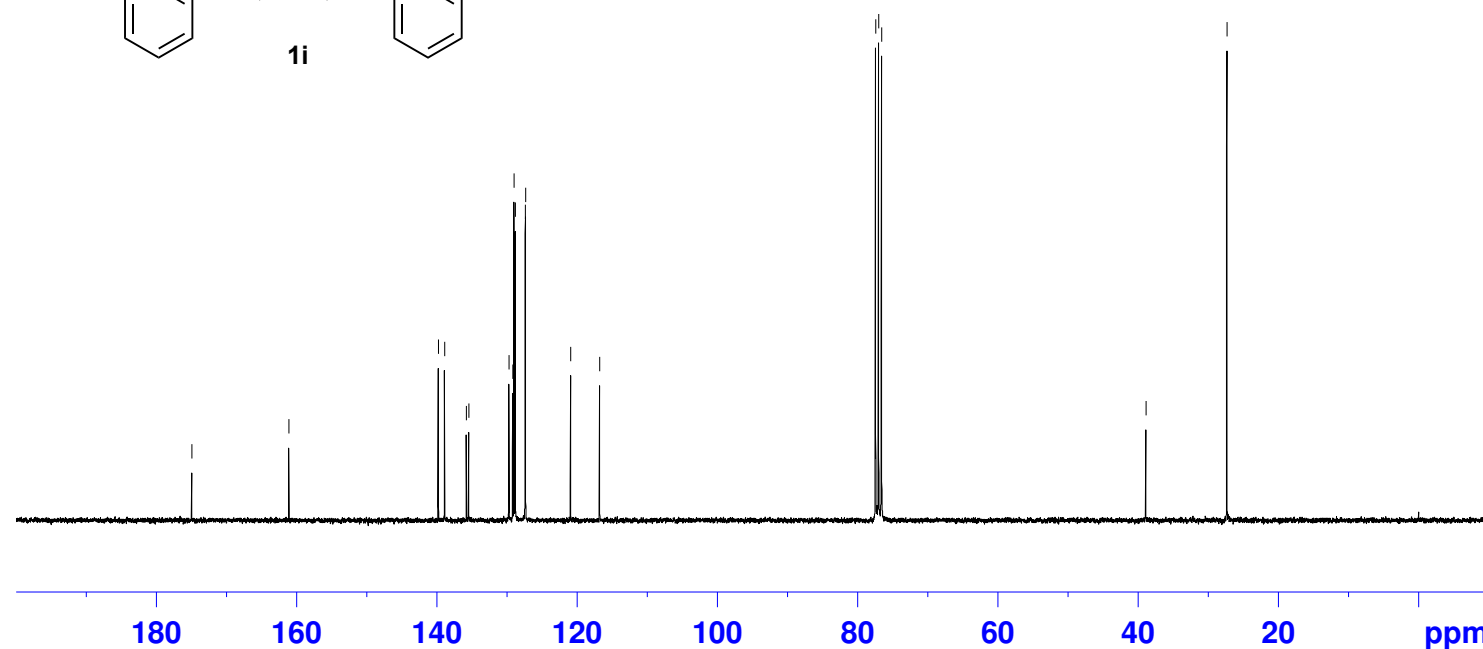

Current Data Parameters  
 NAME Yakka\_Yamada\_2  
 EXPNO 1352  
 PROCNO 1

F2 - Acquisition Parameters  
 Date\_ 20191227  
 Time\_ 2.11  
 INSTRUM spect  
 PROBHD 5 mm PABBO BB-  
 PULPROG zgpg30  
 TD 65536  
 SOLVENT CDCl3  
 NS 2048  
 DS 4  
 SWH 18028.846 Hz  
 FIDRES 0.275098 Hz  
 AQ 1.8175317 sec  
 RG 2050  
 DW 27.733 usec  
 DE 6.50 usec  
 TE 296.0 K  
 D1 2.00000000 sec  
 D11 0.03000000 sec  
 TD0 1

==== CHANNEL f1 =====  
 SFO1 75.4752953 MHz  
 NUC1 13C  
 P1 10.00 usec  
 PLW1 34.00000000 W

==== CHANNEL f2 =====  
 SFO2 300.1312005 MHz  
 NUC2 1H  
 CPDPRG[2] waltz16  
 PCPD2 80.00 usec  
 PLW2 6.19999981 W  
 PLW12 0.21797000 W  
 PLW13 0.13950001 W

F2 - Processing parameters  
 SI 32768  
 SF 75.4677526 MHz  
 WDW EM  
 SSB 0  
 LB 1.00 Hz  
 GB 0  
 PC 1.40

<sup>1</sup>H-NMR of **1j** (300 MHz, CDCl<sub>3</sub>)

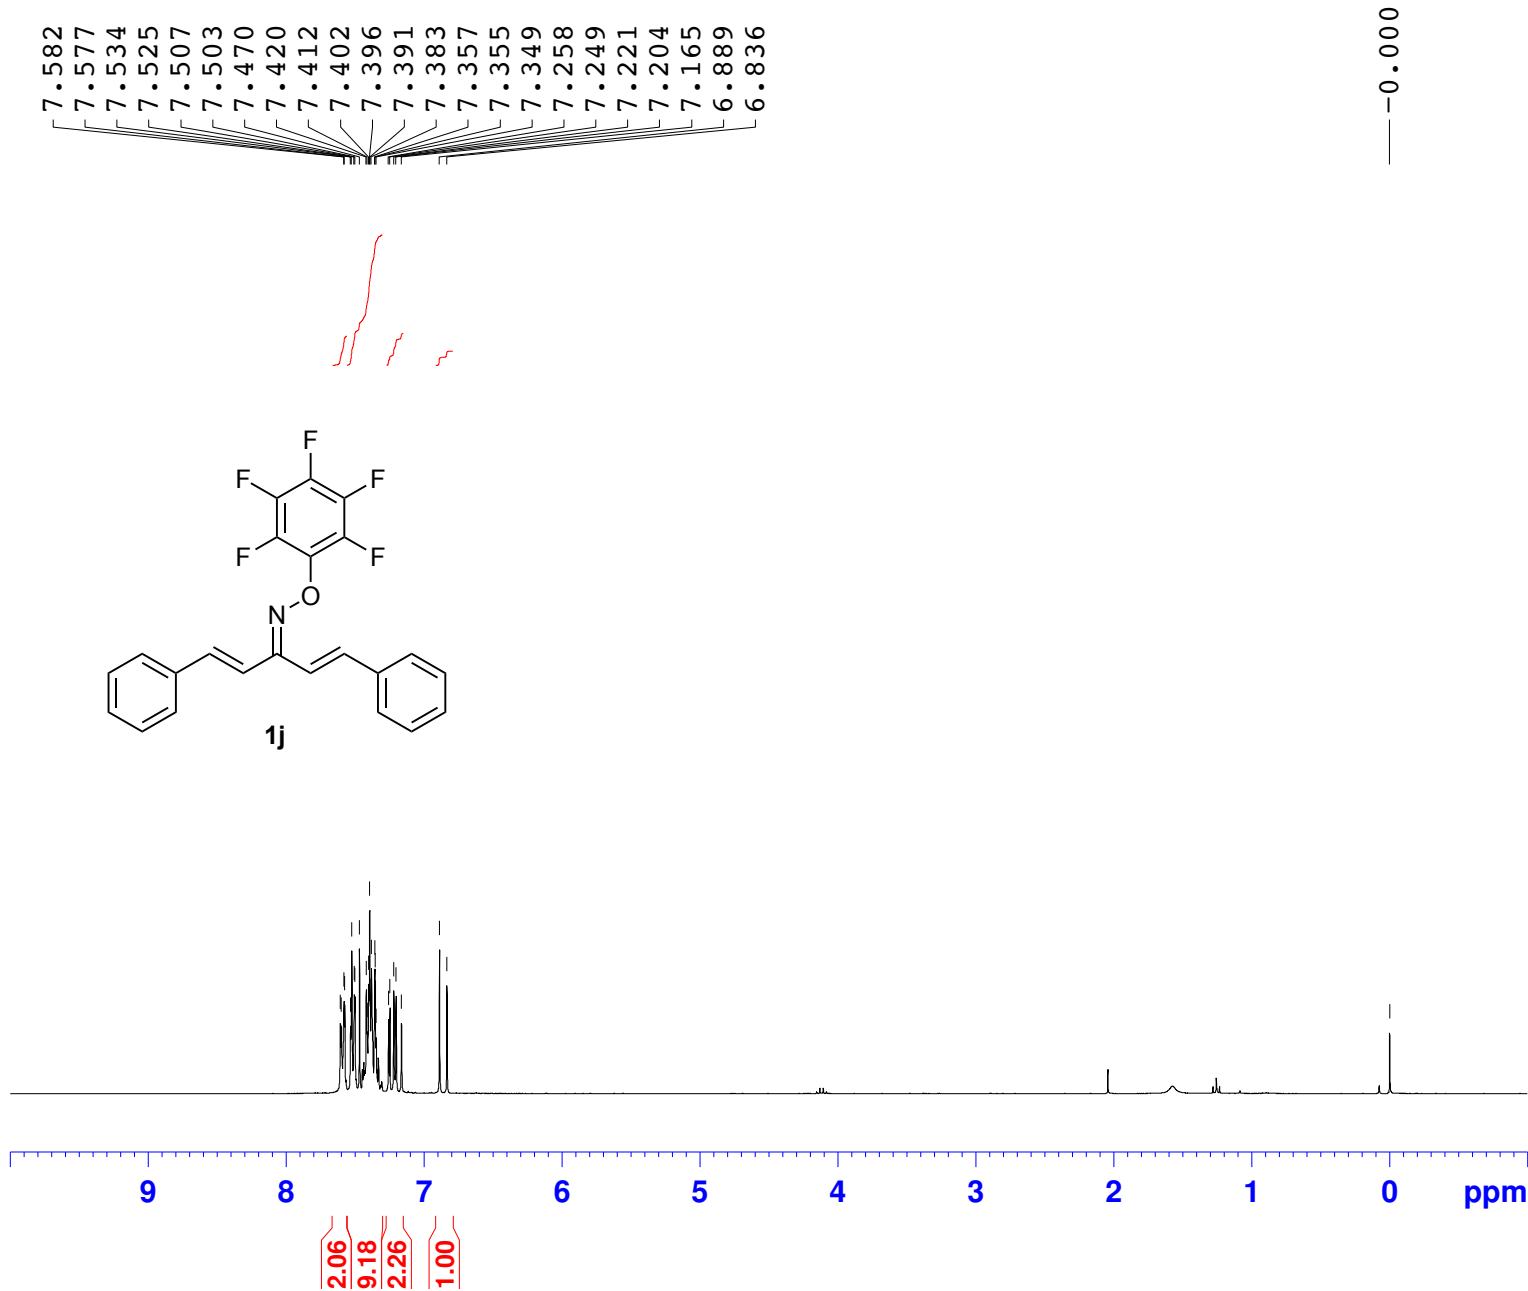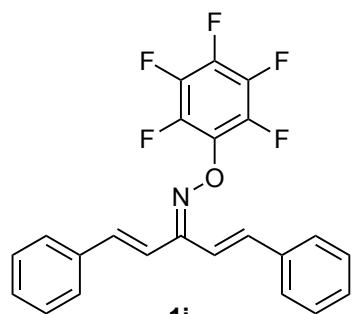

Current Data Parameters  
 NAME Yakka\_Yamada\_2  
 EXPNO 1420  
 PROCNO 1

F2 - Acquisition Parameters  
 Date\_ 20191226  
 Time\_ 20.47  
 INSTRUM spect  
 PROBHD 5 mm PABBO BB-  
 PULPROG zg30  
 TD 65536  
 SOLVENT CDCl3  
 NS 16  
 DS 2  
 SWH 6188.119 Hz  
 FIDRES 0.094423 Hz  
 AQ 5.2953086 sec  
 RG 71.8  
 DW 80.800 usec  
 DE 6.50 usec  
 TE 294.4 K  
 D1 1.00000000 sec  
 TD0 1

==== CHANNEL f1 =====  
 SFO1 300.1318534 MHz  
 NUC1 1H  
 P1 15.00 usec  
 PLW1 6.19999981 W

F2 - Processing parameters  
 SI 32768  
 SF 300.1300100 MHz  
 WDW EM  
 SSB 0  
 LB 0.30 Hz  
 GB 0  
 PC 1.00

<sup>13</sup>C-NMR of **1j** (75 MHz, CDCl<sub>3</sub>)

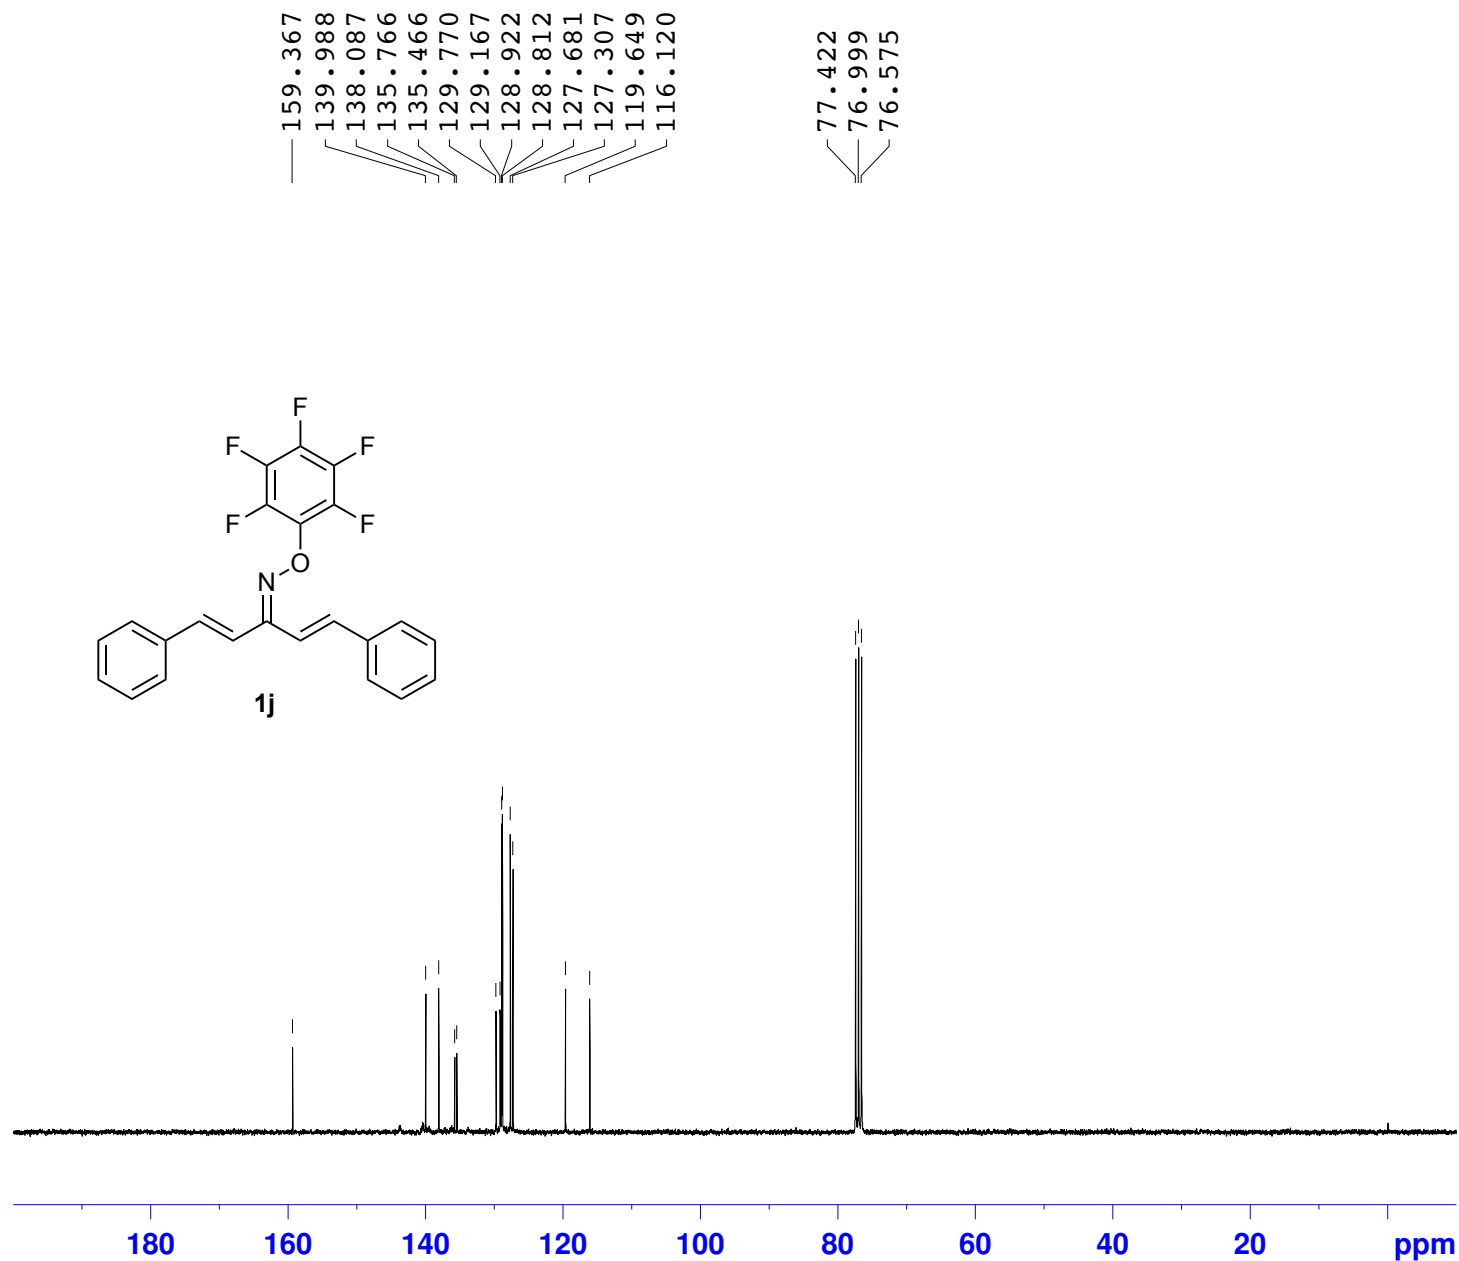

Current Data Parameters  
 NAME Yakka\_Yamada\_2  
 EXPNO 1422  
 PROCNO 1

F2 - Acquisition Parameters  
 Date\_ 20191228  
 Time 6.45  
 INSTRUM spect  
 PROBHD 5 mm PABBO BB-  
 PULPROG zgpg30  
 TD 65536  
 SOLVENT CDCl3  
 NS 2048  
 DS 4  
 SWH 18028.846 Hz  
 FIDRES 0.275098 Hz  
 AQ 1.8175317 sec  
 RG 2050  
 DW 27.733 usec  
 DE 6.50 usec  
 TE 295.9 K  
 D1 2.00000000 sec  
 D11 0.03000000 sec  
 TD0 1

==== CHANNEL f1 =====  
 SFO1 75.4752953 MHz  
 NUC1 13C  
 P1 10.00 usec  
 PLW1 34.00000000 W

==== CHANNEL f2 =====  
 SFO2 300.1312005 MHz  
 NUC2 1H  
 CPDPRG[2] waltz16  
 PCPD2 80.00 usec  
 PLW2 6.19999981 W  
 PLW12 0.21797000 W  
 PLW13 0.13950001 W

F2 - Processing parameters  
 SI 32768  
 SF 75.4677510 MHz  
 WDW EM  
 SSB 0  
 LB 1.00 Hz  
 GB 0  
 PC 1.40

<sup>1</sup>H-NMR of **1k** (300 MHz, CDCl<sub>3</sub>)

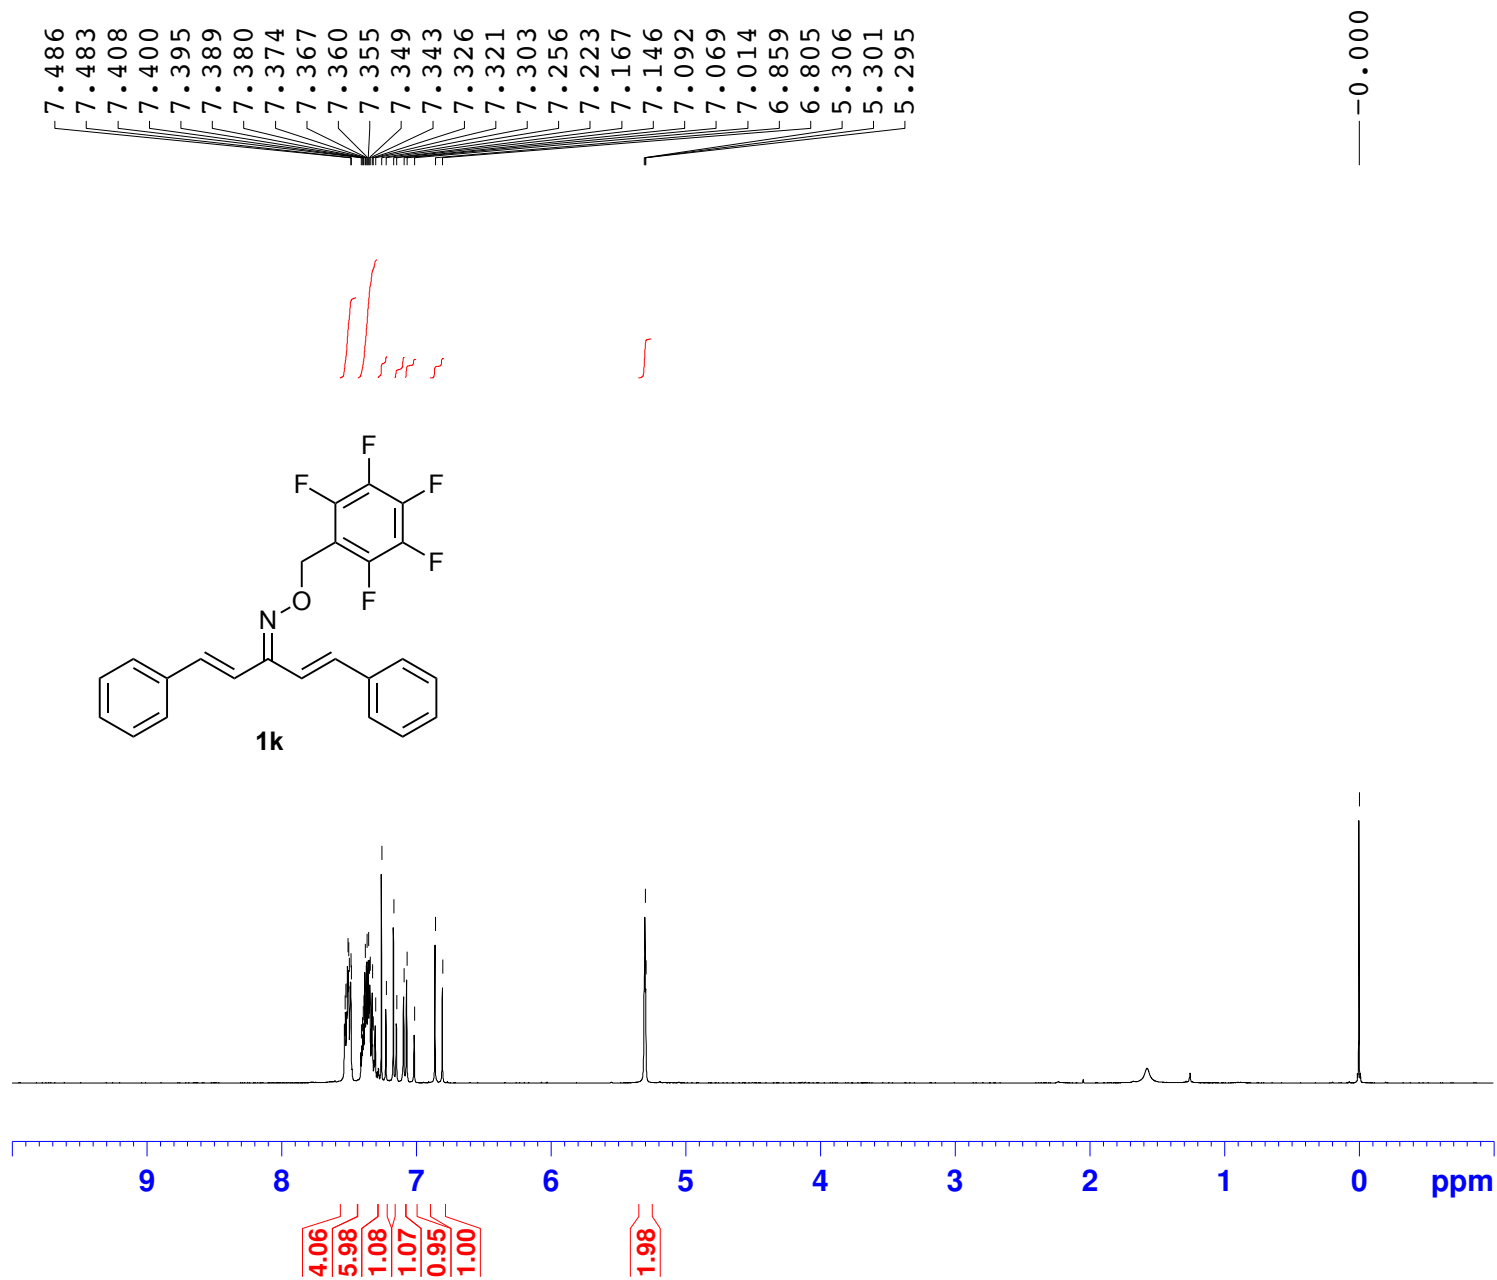

Current Data Parameters  
 NAME Yakka\_Yamada\_2  
 EXPNO 4420  
 PROCNO 1

F2 - Acquisition Parameters  
 Date\_ 20210313  
 Time 12.01  
 INSTRUM spect  
 PROBHD 5 mm PABBO BB-  
 PULPROG zg30  
 TD 65536  
 SOLVENT CDCl3  
 NS 16  
 DS 2  
 SWH 6188.119 Hz  
 FIDRES 0.094423 Hz  
 AQ 5.2953086 sec  
 RG 101  
 DW 80.800 usec  
 DE 6.50 usec  
 TE 294.6 K  
 D1 1.00000000 sec  
 TD0 1

===== CHANNEL f1 =====  
 SFO1 300.1318534 MHz  
 NUC1 1H  
 P1 15.00 usec  
 PLW1 6.19999981 W

F2 - Processing parameters  
 SI 32768  
 SF 300.1300075 MHz  
 WDW EM  
 SSB 0  
 LB 0.30 Hz  
 GB 0  
 PC 1.00

<sup>13</sup>C-NMR of 1k (75 MHz, CDCl<sub>3</sub>)

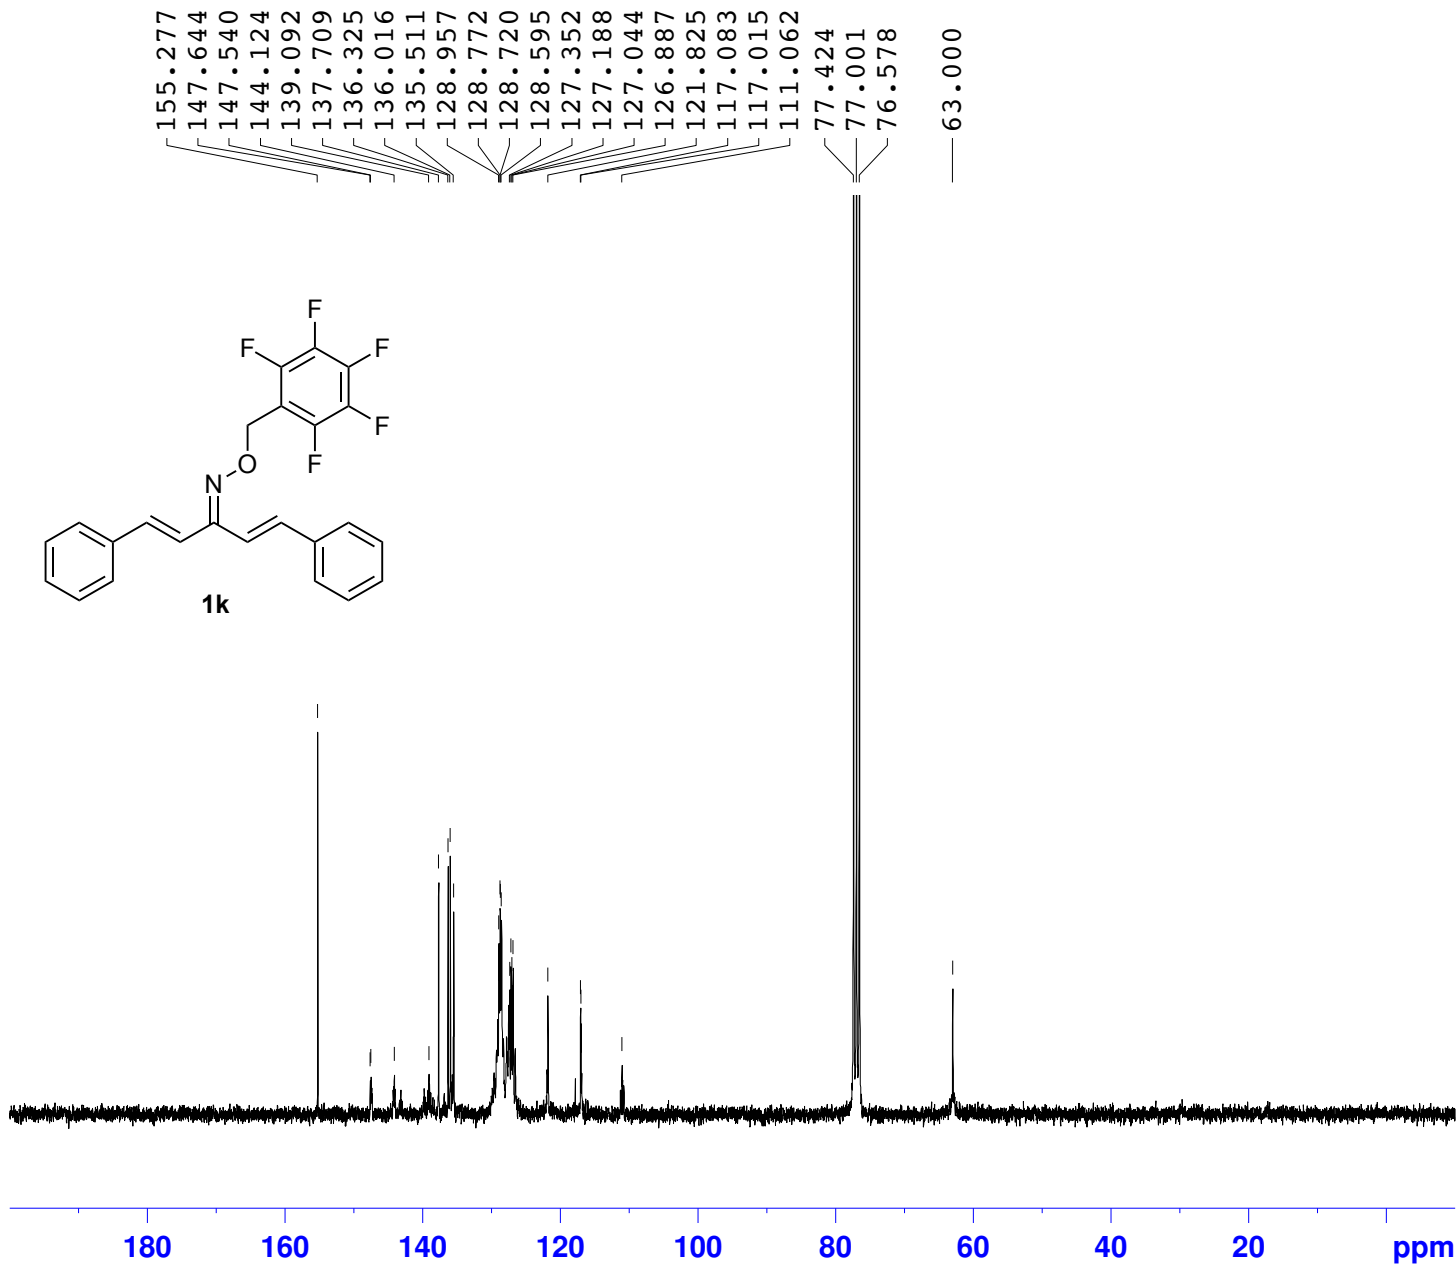

Current Data Parameters  
 NAME Yakka\_Yamada\_2  
 EXPNO 4481  
 PROCNO 1

F2 - Acquisition Parameters  
 Date\_ 20210320  
 Time 5.48  
 INSTRUM spect  
 PROBHD 5 mm PABBO BB-  
 PULPROG zgpg30  
 TD 65536  
 SOLVENT CDCl3  
 NS 8000  
 DS 4  
 SWH 18028.846 Hz  
 FIDRES 0.275098 Hz  
 AQ 1.8175317 sec  
 RG 2050  
 DW 27.733 usec  
 DE 6.50 usec  
 TE 295.5 K  
 D1 2.00000000 sec  
 D11 0.03000000 sec  
 TD0 1

==== CHANNEL f1 =====  
 SFO1 75.4752953 MHz  
 NUC1 13C  
 P1 10.00 usec  
 PLW1 34.50000000 W

==== CHANNEL f2 =====  
 SFO2 300.1312005 MHz  
 NUC2 1H  
 CPDPRG[2] waltz16  
 PCPD2 80.00 usec  
 PLW2 6.19999981 W  
 PLW12 0.21797000 W  
 PLW13 0.13950001 W

F2 - Processing parameters  
 SI 32768  
 SF 75.4677509 MHz  
 WDW EM  
 SSB 0  
 LB 1.00 Hz  
 GB 0  
 PC 1.40

<sup>1</sup>H-NMR of **11** (300 MHz, CDCl<sub>3</sub>)

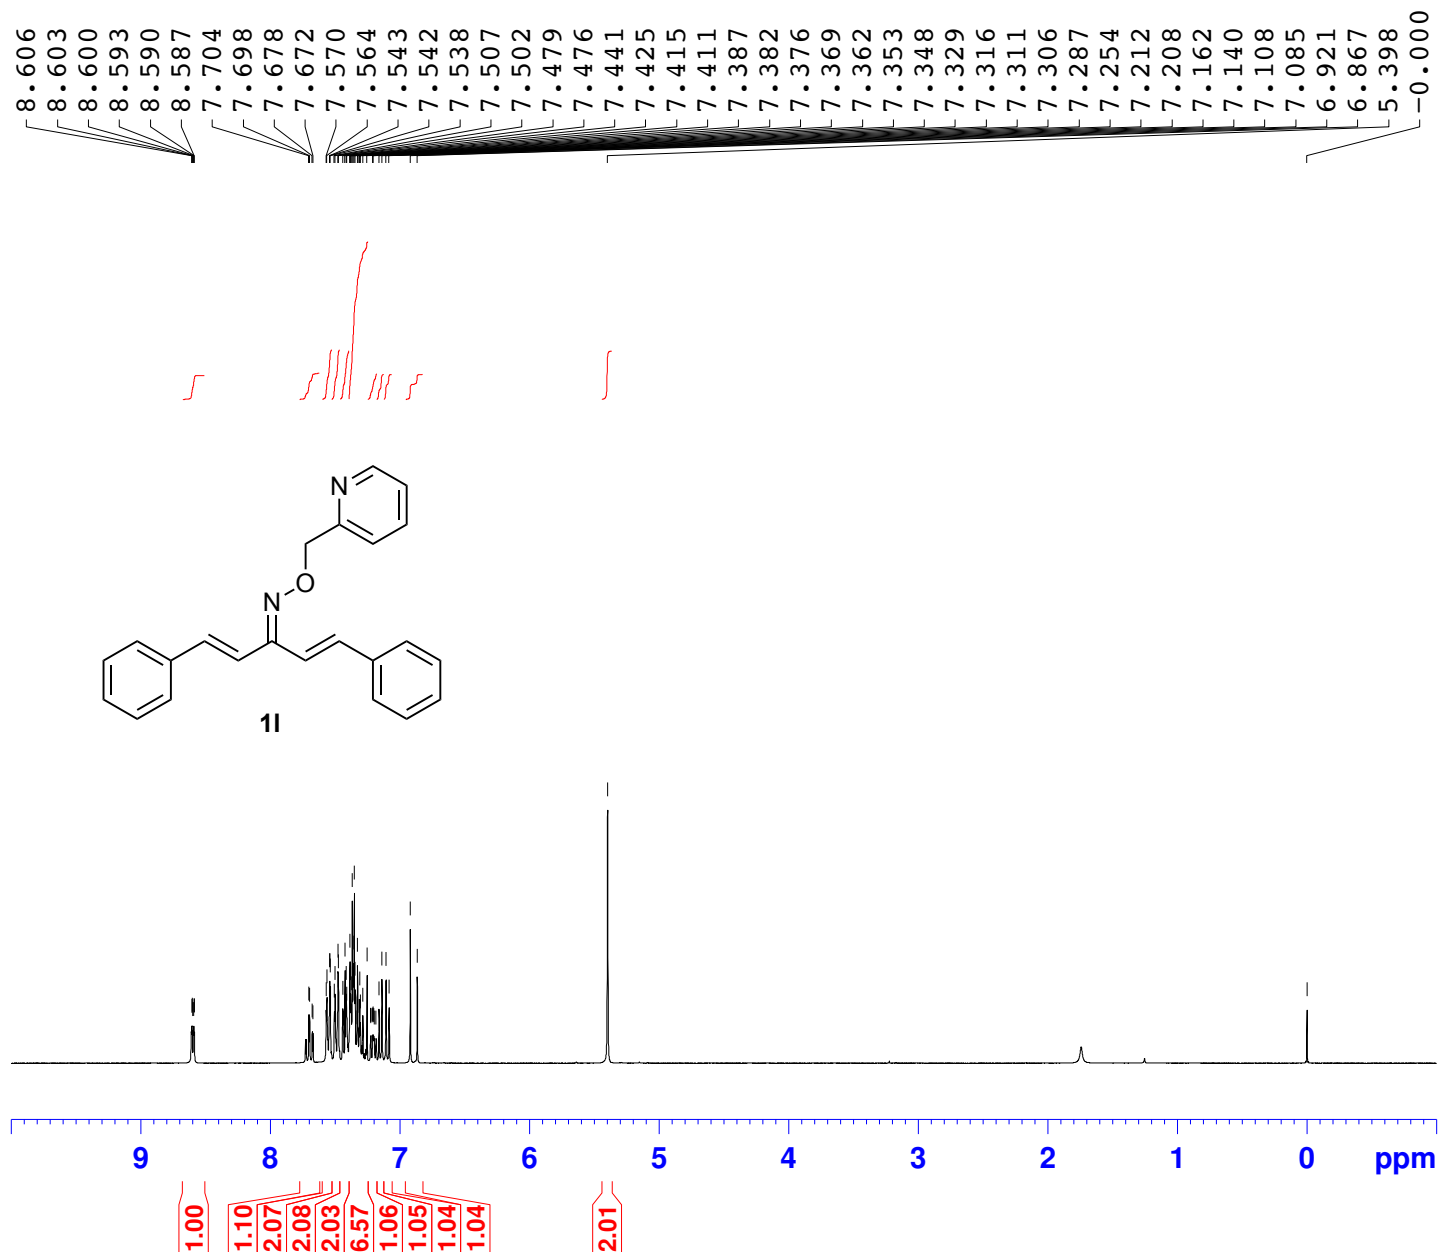

Current Data Parameters  
 NAME Yakka\_Yamada\_2  
 EXPNO 1440  
 PROCNO 1

F2 - Acquisition Parameters  
 Date\_ 20191227  
 Time 9.09  
 INSTRUM spect  
 PROBHD 5 mm PABBO BB-  
 PULPROG zg30  
 TD 65536  
 SOLVENT CDCl3  
 NS 16  
 DS 2  
 SWH 6188.119 Hz  
 FIDRES 0.094423 Hz  
 AQ 5.2953086 sec  
 RG 57  
 DW 80.800 usec  
 DE 6.50 usec  
 TE 294.4 K  
 D1 1.00000000 sec  
 TD0 1

==== CHANNEL f1 =====  
 SF01 300.1318534 MHz  
 NUC1 1H  
 P1 15.00 usec  
 PLW1 6.19999981 W

F2 - Processing parameters  
 SI 32768  
 SF 300.1300085 MHz  
 WDW EM  
 SSB 0  
 LB 0.30 Hz  
 GB 0  
 PC 1.00

<sup>13</sup>C-NMR of **11** (75 MHz, CDCl<sub>3</sub>)

158.279  
154.952  
149.197  
137.435  
136.555  
136.416  
136.164  
135.208  
129.044  
128.768  
128.687  
128.476  
127.337  
126.982  
122.407  
122.197  
121.666  
117.430

77.421  
76.998  
76.575

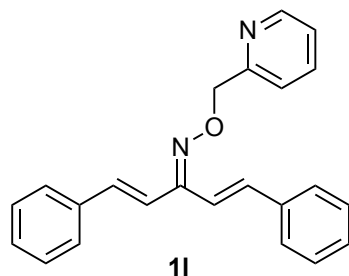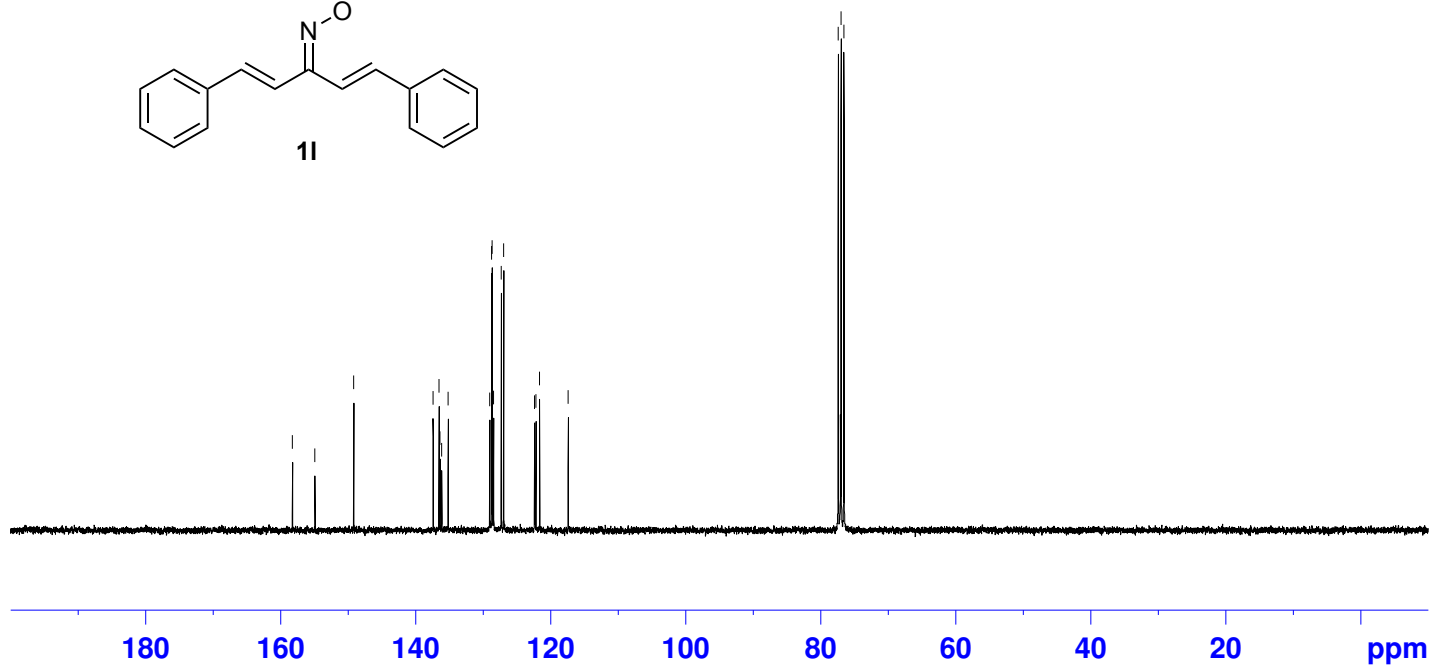

Current Data Parameters  
NAME Yakka\_Yamada\_2  
EXPNO 1444  
PROCNO 1

F2 - Acquisition Parameters  
Date\_ 20191228  
Time 14.54  
INSTRUM spect  
PROBHD 5 mm PABBO BB-  
PULPROG zgpg30  
TD 65536  
SOLVENT CDCl3  
NS 1024  
DS 4  
SWH 18028.846 Hz  
FIDRES 0.275098 Hz  
AQ 1.8175317 sec  
RG 2050  
DW 27.733 usec  
DE 6.50 usec  
TE 295.9 K  
D1 2.00000000 sec  
D11 0.03000000 sec  
TD0 1

==== CHANNEL f1 =====  
SFO1 75.4752953 MHz  
NUC1 13C  
P1 10.00 usec  
PLW1 34.00000000 W

==== CHANNEL f2 =====  
SFO2 300.1312005 MHz  
NUC2 1H  
CPDPRG[2] waltz16  
PCPD2 80.00 usec  
PLW2 6.19999981 W  
PLW12 0.21797000 W  
PLW13 0.13950001 W

F2 - Processing parameters  
SI 32768  
SF 75.4677521 MHz  
WDW EM  
SSB 0  
LB 1.00 Hz  
GB 0  
PC 1.40

<sup>1</sup>H-NMR of **1m** (300 MHz, CDCl<sub>3</sub>)

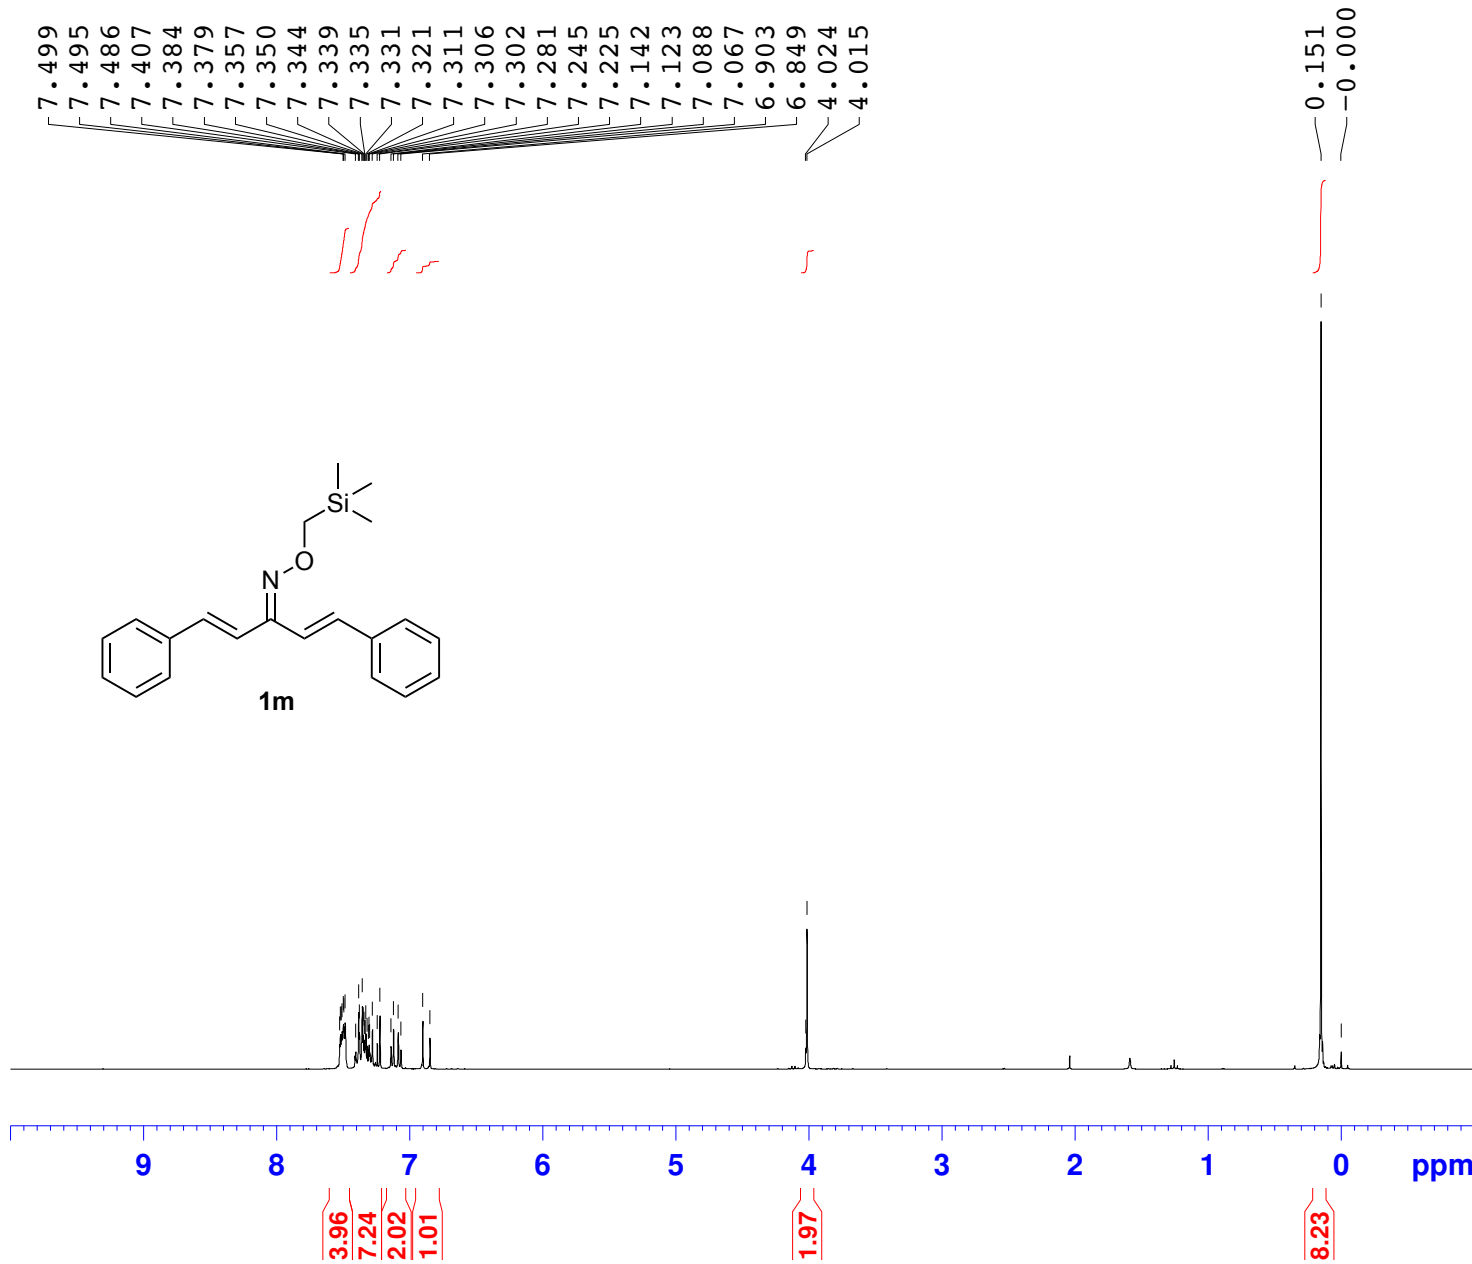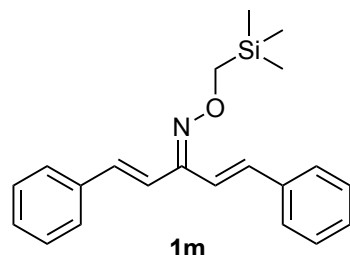

```

Current Data Parameters
NAME      Yakka_Yamada_2
EXPNO     1340
PROCNO    1

F2 - Acquisition Parameters
Date_     20191226
Time      19.46
INSTRUM   spect
PROBHD    5 mm PABBO BB-
PULPROG   zg30
TD         65536
SOLVENT   CDCl3
NS         16
DS         2
SWH        6188.119 Hz
FIDRES     0.094423 Hz
AQ         5.2953086 sec
RG         36
DW         80.800 usec
DE         6.50 usec
TE         294.4 K
D1         1.00000000 sec
TD0        1

===== CHANNEL f1 =====
SFO1      300.1318534 MHz
NUC1       1H
P1         15.00 usec
PLW1       6.19999981 W

F2 - Processing parameters
SI         32768
SF         300.1300113 MHz
WDW        EM
SSB        0
LB         0.30 Hz
GB         0
PC         1.00
    
```



<sup>13</sup>C-NMR of **1m** (75 MHz, CDCl<sub>3</sub>)

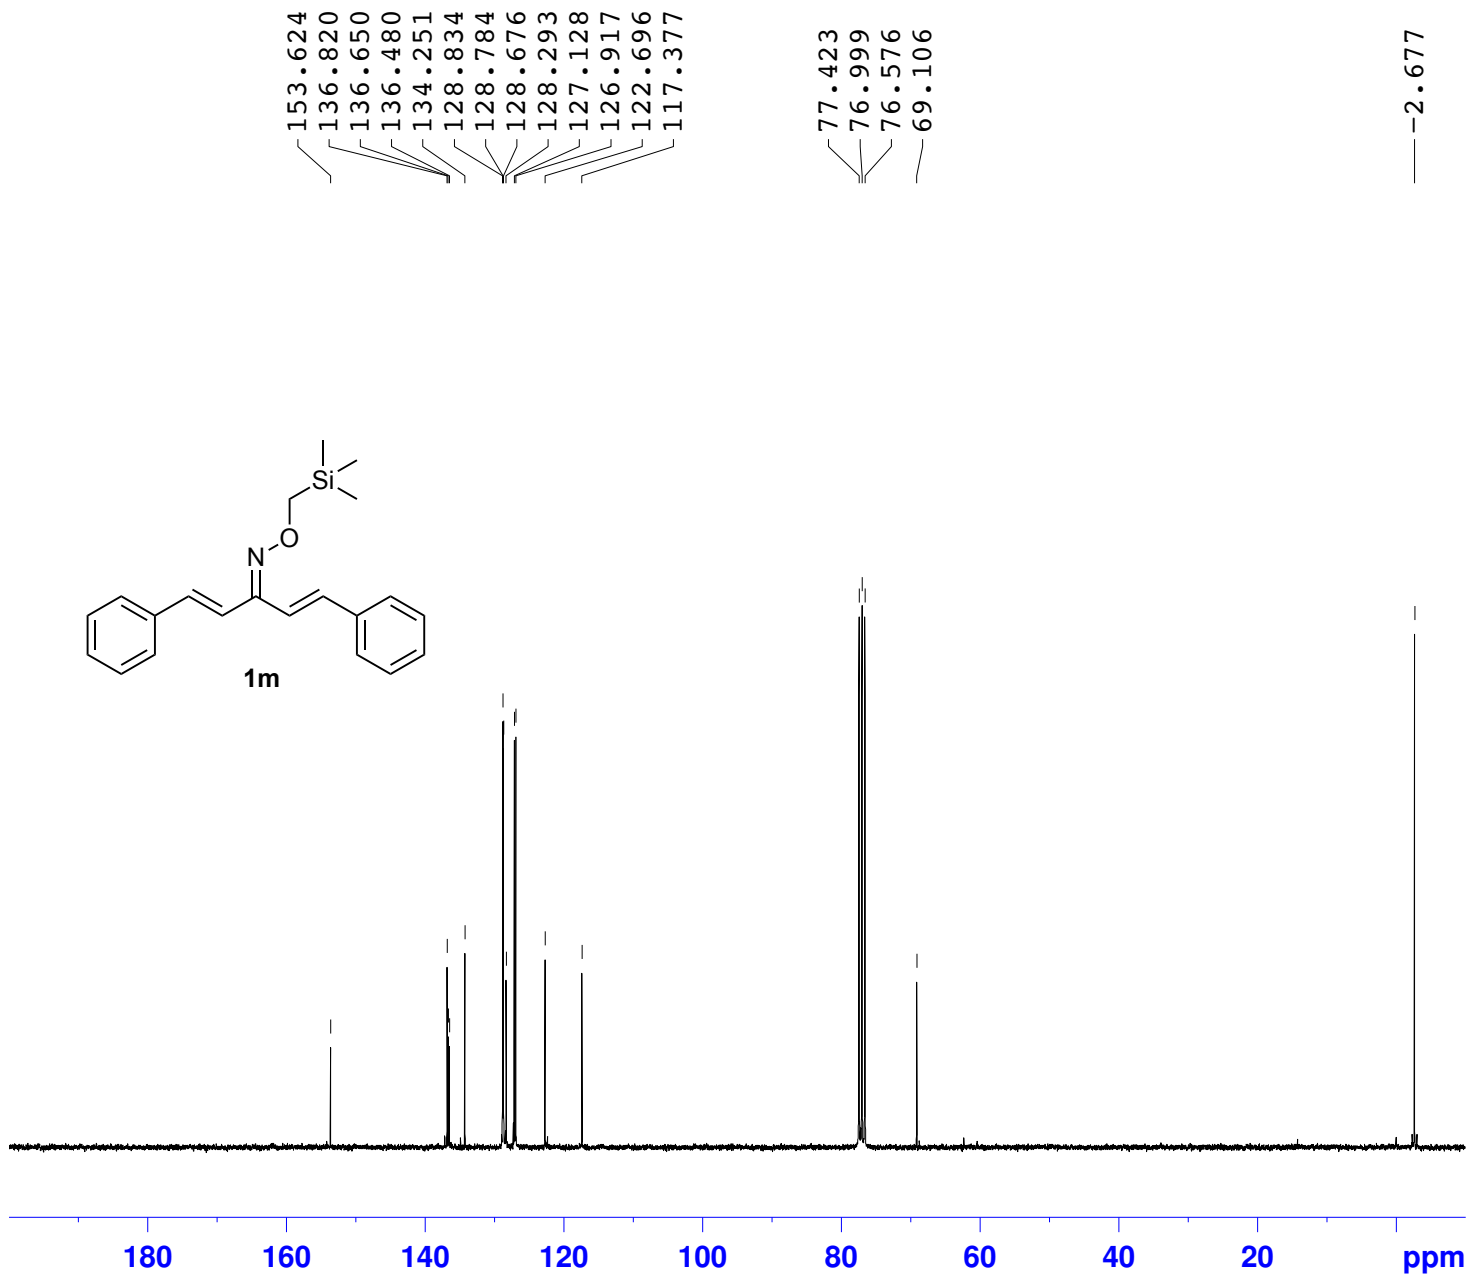

Current Data Parameters  
 NAME Yakka\_Yamada\_2  
 EXPNO 1342  
 PROCNO 1

F2 - Acquisition Parameters  
 Date\_ 20191226  
 Time 23.29  
 INSTRUM spect  
 PROBHD 5 mm PABBO BB-  
 PULPROG zgpg30  
 TD 65536  
 SOLVENT CDCl3  
 NS 2048  
 DS 4  
 SWH 18028.846 Hz  
 FIDRES 0.275098 Hz  
 AQ 1.8175317 sec  
 RG 2050  
 DW 27.733 usec  
 DE 6.50 usec  
 TE 295.9 K  
 D1 2.00000000 sec  
 D11 0.03000000 sec  
 TD0 1

==== CHANNEL f1 =====  
 SFO1 75.4752953 MHz  
 NUC1 13C  
 P1 10.00 usec  
 PLW1 34.00000000 W

==== CHANNEL f2 =====  
 SFO2 300.1312005 MHz  
 NUC2 1H  
 CPDPRG[2] waltz16  
 PCPD2 80.00 usec  
 PLW2 6.19999981 W  
 PLW12 0.21797000 W  
 PLW13 0.13950001 W

F2 - Processing parameters  
 SI 32768  
 SF 75.4677520 MHz  
 WDW EM  
 SSB 0  
 LB 1.00 Hz  
 GB 0  
 PC 1.40

<sup>1</sup>H-NMR of **1n** (300 MHz, CDCl<sub>3</sub>)

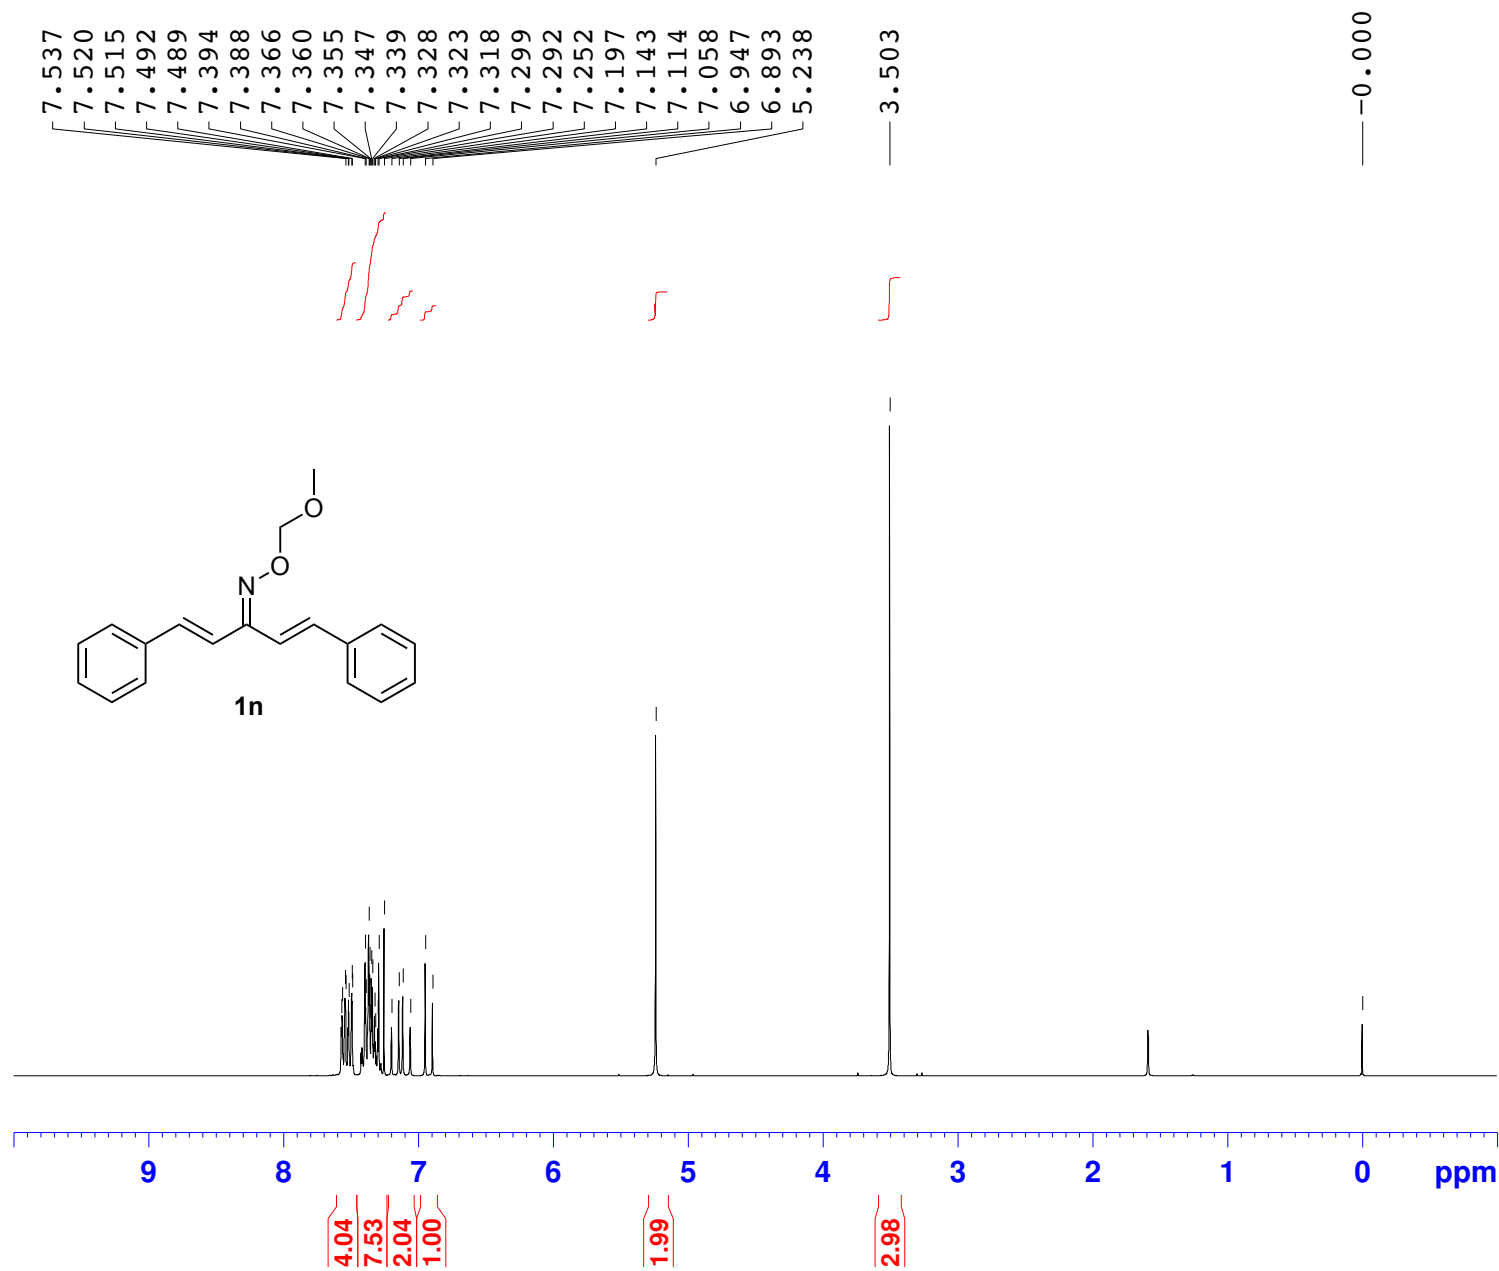

Current Data Parameters  
 NAME Yakka\_Yamada\_2  
 EXPNO 1360  
 PROCNO 1

F2 - Acquisition Parameters  
 Date\_ 20191226  
 Time\_ 20.01  
 INSTRUM spect  
 PROBHD 5 mm PABBO BB-  
 PULPROG zg30  
 TD 65536  
 SOLVENT CDCl3  
 NS 16  
 DS 2  
 SWH 6188.119 Hz  
 FIDRES 0.094423 Hz  
 AQ 5.2953086 sec  
 RG 57  
 DW 80.800 usec  
 DE 6.50 usec  
 TE 294.4 K  
 D1 1.00000000 sec  
 TD0 1

==== CHANNEL f1 =====  
 SFO1 300.1318534 MHz  
 NUC1 1H  
 P1 15.00 usec  
 PLW1 6.19999981 W

F2 - Processing parameters  
 SI 32768  
 SF 300.1300091 MHz  
 WDW EM  
 SSB 0  
 LB 0.30 Hz  
 GB 0  
 PC 1.00

<sup>13</sup>C-NMR of **1n** (75 MHz, CDCl<sub>3</sub>)

155.700  
137.564  
136.396  
136.106  
135.619  
129.091  
128.788  
128.718  
128.543  
127.327  
127.022  
122.195  
117.402  
— 98.797

77.425  
77.002  
76.579

— 56.414

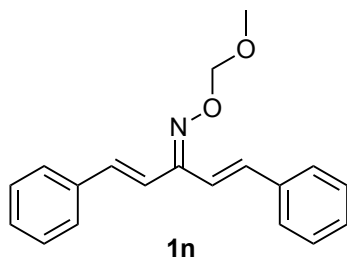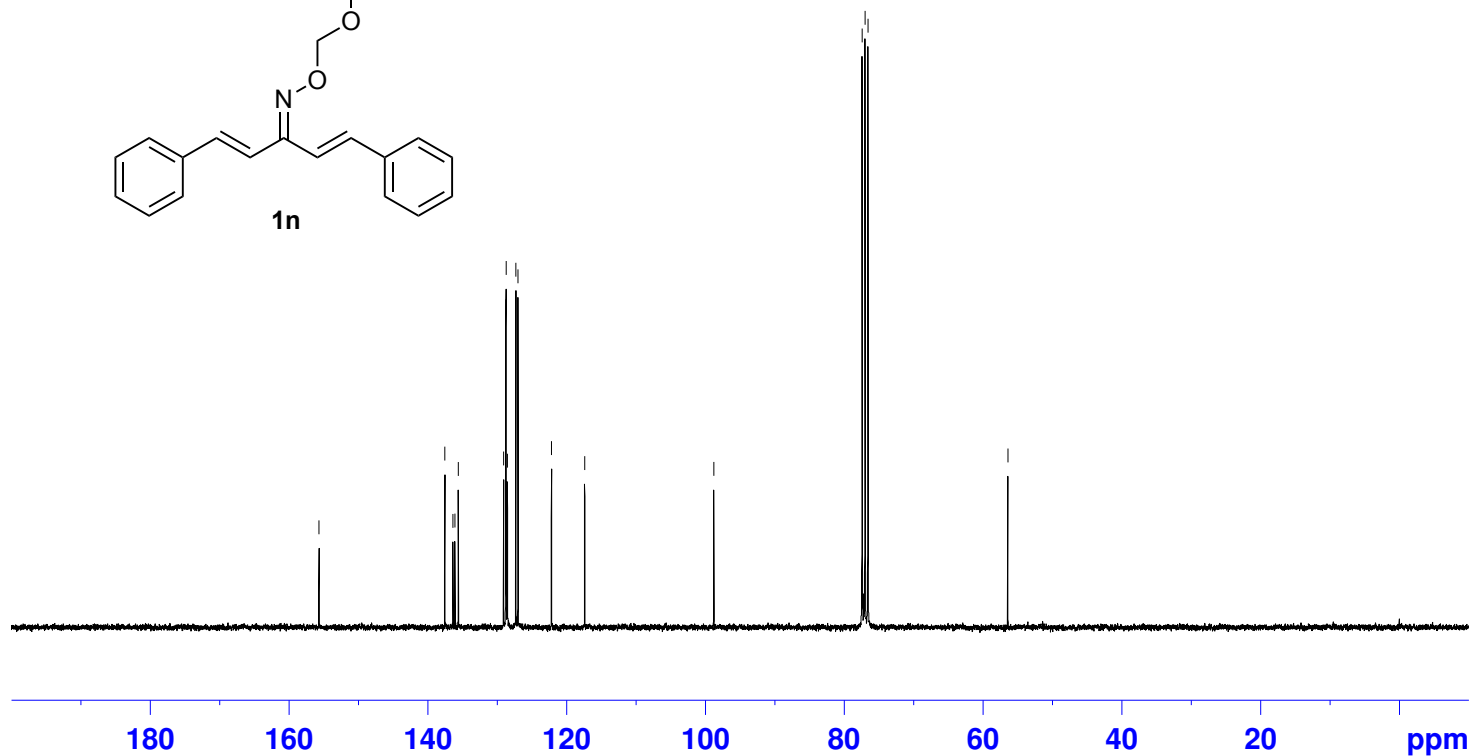

Current Data Parameters  
NAME Yakka\_Yamada\_2  
EXPNO 1362  
PROCNO 1

F2 - Acquisition Parameters  
Date\_ 20191227  
Time 4.54  
INSTRUM spect  
PROBHD 5 mm PABBO BB-  
PULPROG zgpg30  
TD 65536  
SOLVENT CDCl3  
NS 2048  
DS 4  
SWH 18028.846 Hz  
FIDRES 0.275098 Hz  
AQ 1.8175317 sec  
RG 2050  
DW 27.733 usec  
DE 6.50 usec  
TE 295.9 K  
D1 2.00000000 sec  
D11 0.03000000 sec  
TD0 1

==== CHANNEL f1 =====  
SFO1 75.4752953 MHz  
NUC1 13C  
P1 10.00 usec  
PLW1 34.00000000 W

==== CHANNEL f2 =====  
SFO2 300.1312005 MHz  
NUC2 1H  
CPDPRG[2] waltz16  
PCPD2 80.00 usec  
PLW2 6.19999981 W  
PLW12 0.21797000 W  
PLW13 0.13950001 W

F2 - Processing parameters  
SI 32768  
SF 75.4677514 MHz  
WDW EM  
SSB 0  
LB 1.00 Hz  
GB 0  
PC 1.40

<sup>1</sup>H-NMR of **1o** (300 MHz, CDCl<sub>3</sub>)

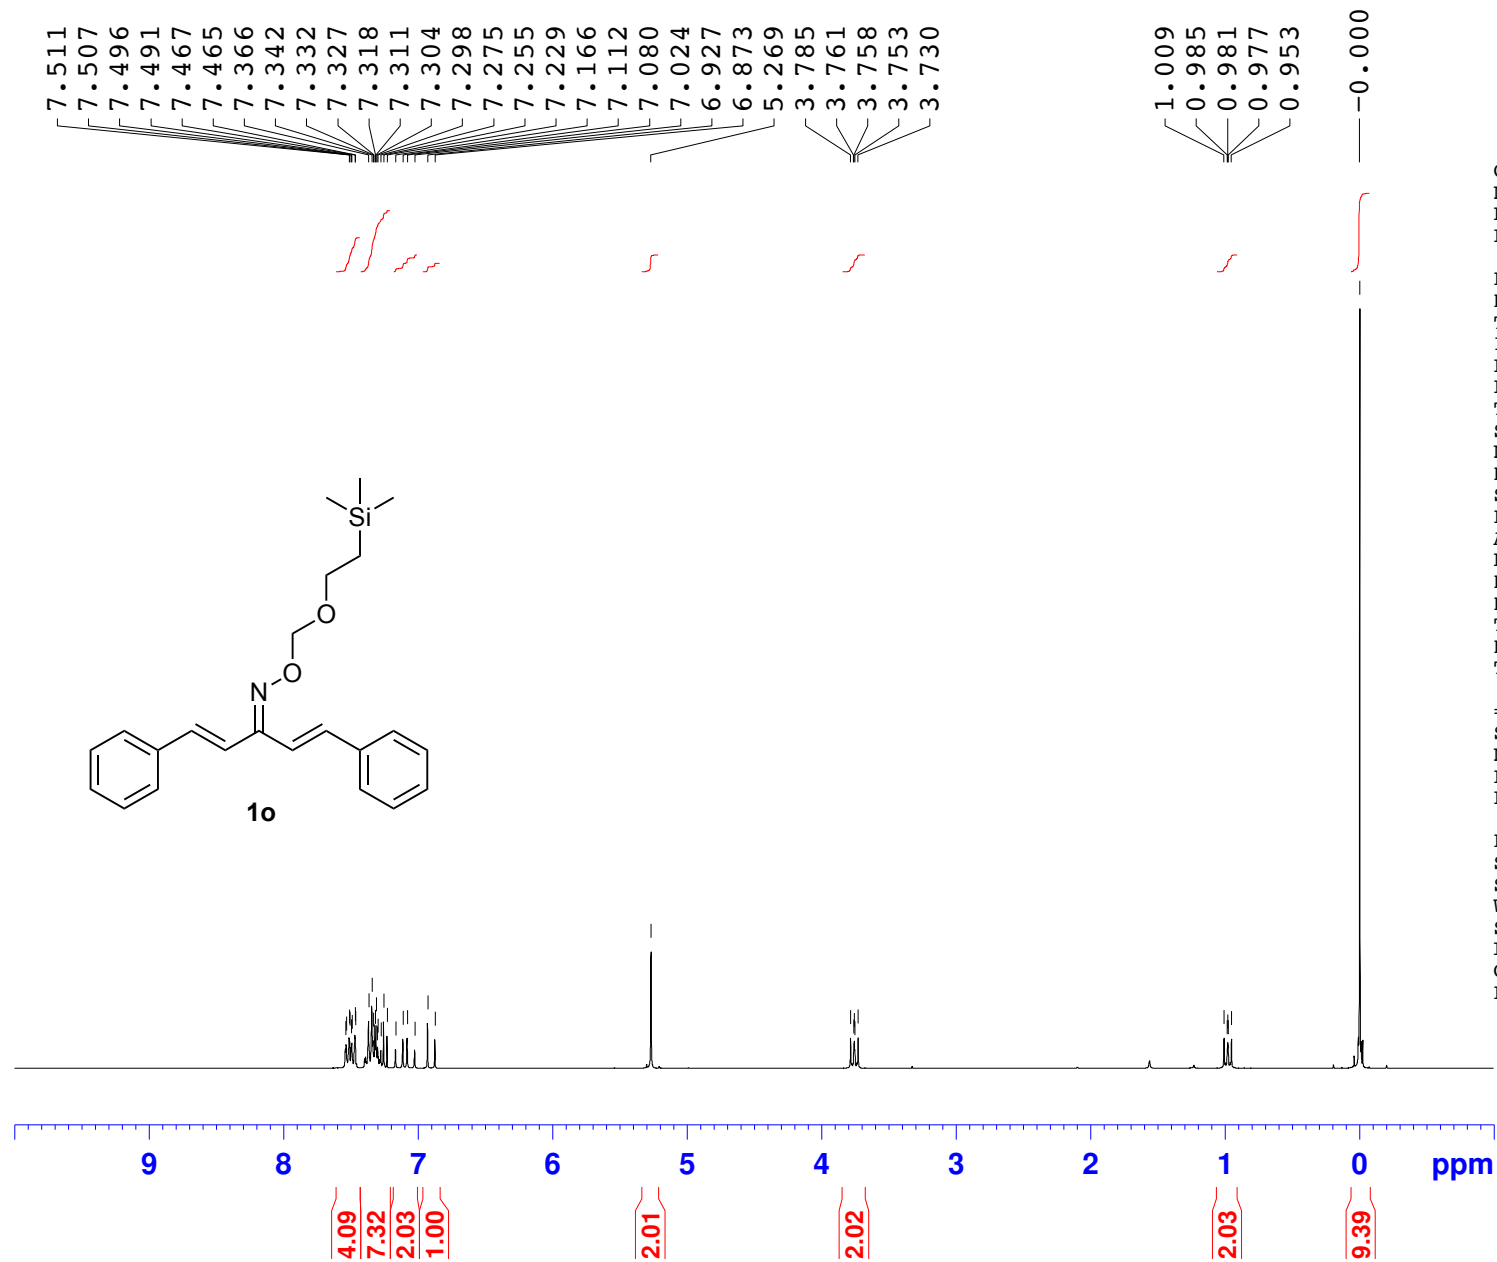

Current Data Parameters  
 NAME Yakka\_Yamada\_2  
 EXPNO 6730  
 PROCNO 1

F2 - Acquisition Parameters  
 Date\_ 20220312  
 Time\_ 17.24  
 INSTRUM spect  
 PROBHD 5 mm PABBO BB-  
 PULPROG zg30  
 TD 65536  
 SOLVENT CDCl3  
 NS 16  
 DS 2  
 SWH 6188.119 Hz  
 FIDRES 0.094423 Hz  
 AQ 5.2953086 sec  
 RG 45.2  
 DW 80.800 usec  
 DE 6.50 usec  
 TE 294.7 K  
 D1 1.00000000 sec  
 TD0 1

==== CHANNEL f1 =====  
 SFO1 300.1318534 MHz  
 NUC1 1H  
 P1 15.00 usec  
 PLW1 8.00000000 W

F2 - Processing parameters  
 SI 32768  
 SF 300.1300150 MHz  
 WDW EM  
 SSB 0  
 LB 0.30 Hz  
 GB 0  
 PC 1.00

<sup>13</sup>C-NMR of **1o** (75 MHz, CDCl<sub>3</sub>)

155.316  
137.344  
136.469  
136.185  
135.382  
129.024  
128.770  
128.713  
128.489  
127.304  
127.000  
122.311  
117.565  
— 97.365

77.426  
77.003  
76.579  
— 66.493

— 18.086

— -1.405

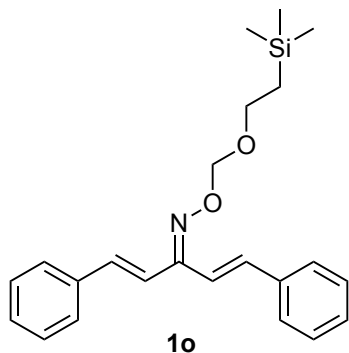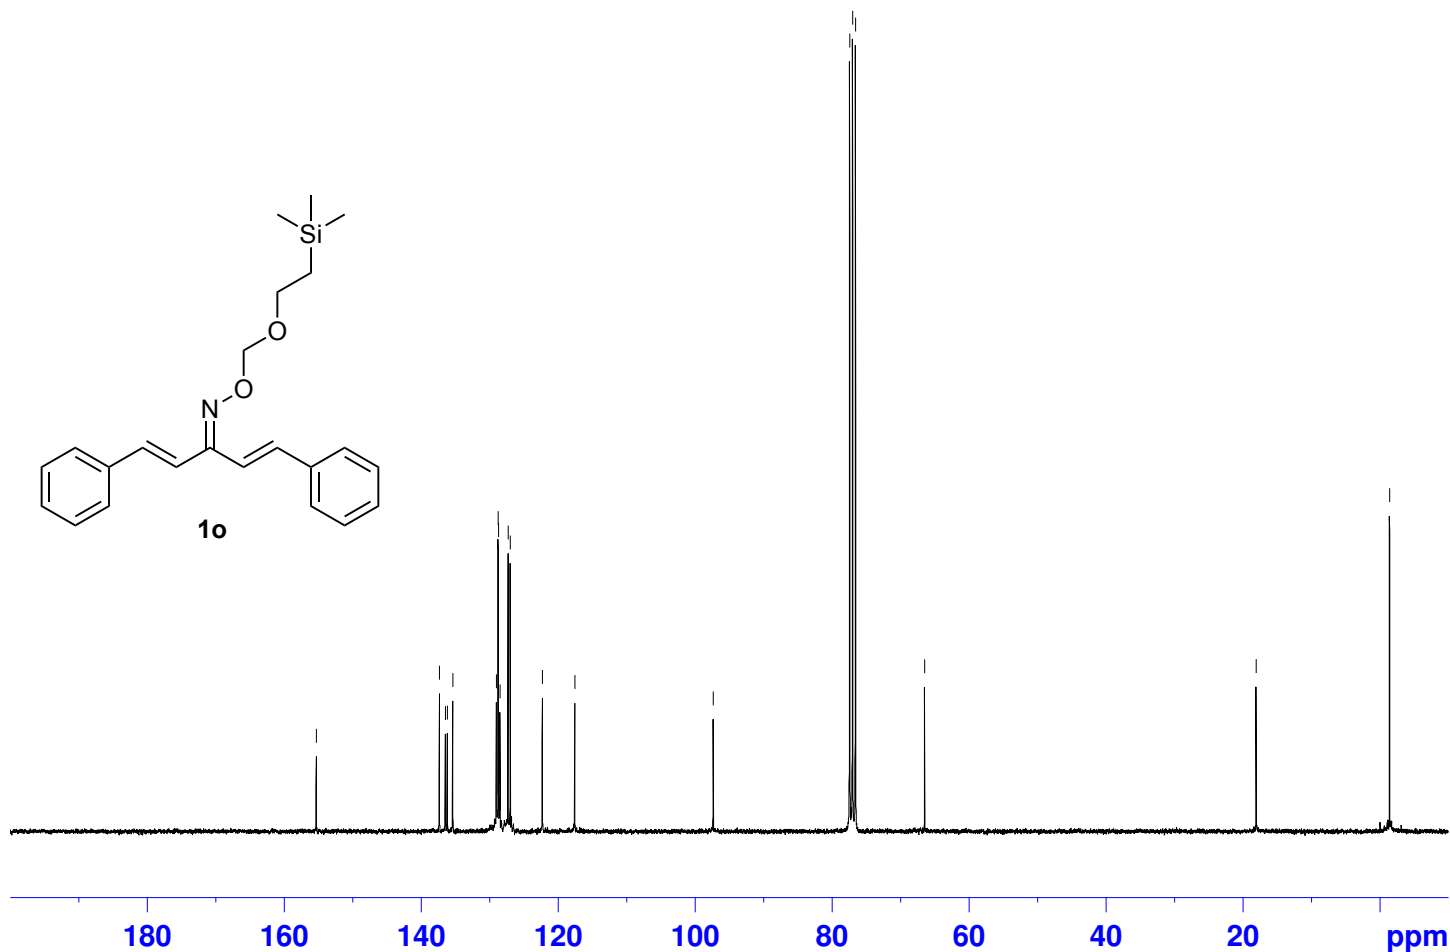

Current Data Parameters  
NAME Yakka\_Yamada\_2  
EXPNO 6732  
PROCNO 1

F2 - Acquisition Parameters  
Date\_ 20220313  
Time 17.15  
INSTRUM spect  
PROBHD 5 mm PABBO BB-  
PULPROG zgpg30  
TD 65536  
SOLVENT CDCl3  
NS 8000  
DS 4  
SWH 18028.846 Hz  
FIDRES 0.275098 Hz  
AQ 1.8175317 sec  
RG 2050  
DW 27.733 usec  
DE 6.50 usec  
TE 295.6 K  
D1 2.00000000 sec  
D11 0.03000000 sec  
TD0 1

==== CHANNEL f1 =====  
SFO1 75.4752953 MHz  
NUC1 13C  
P1 10.00 usec  
PLW1 34.5000000 W

==== CHANNEL f2 =====  
SFO2 300.1312005 MHz  
NUC2 1H  
CPDPRG[2] waltz16  
PCPD2 80.00 usec  
PLW2 8.0000000 W  
PLW12 0.28125000 W  
PLW13 0.18000001 W

F2 - Processing parameters  
SI 32768  
SF 75.4677509 MHz  
WDW EM  
SSB 0  
LB 1.00 Hz  
GB 0  
PC 1.40

<sup>1</sup>H-NMR of **36** (300 MHz, CDCl<sub>3</sub>)

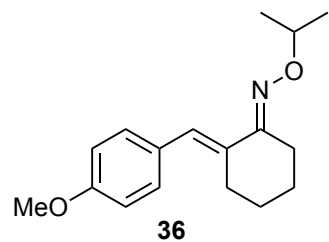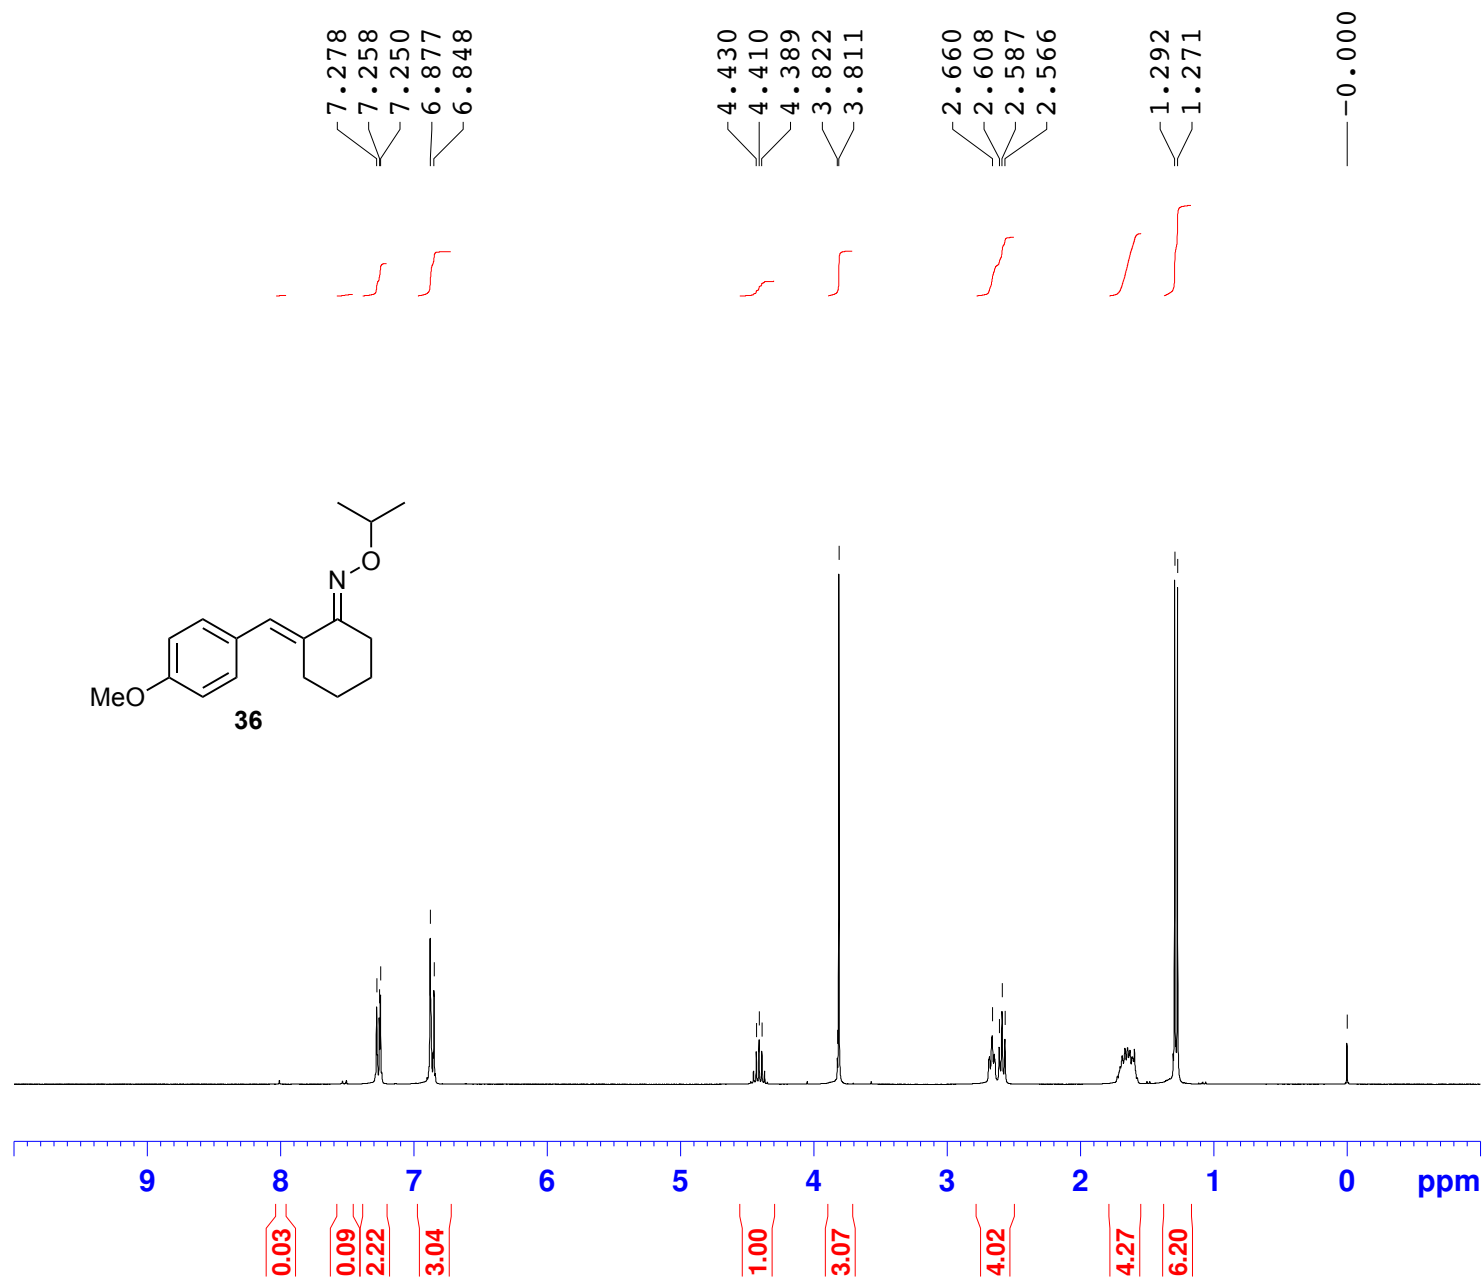

Current Data Parameters  
 NAME Yakka\_Yamada\_2  
 EXPNO 6660  
 PROCNO 1

F2 - Acquisition Parameters  
 Date\_ 20220305  
 Time 20.42  
 INSTRUM spect  
 PROBHD 5 mm PABBO BB-  
 PULPROG zg30  
 TD 65536  
 SOLVENT CDCl3  
 NS 16  
 DS 2  
 SWH 6188.119 Hz  
 FIDRES 0.094423 Hz  
 AQ 5.2953086 sec  
 RG 45.2  
 DW 80.800 usec  
 DE 6.50 usec  
 TE 294.6 K  
 D1 1.00000000 sec  
 TD0 1

===== CHANNEL f1 =====  
 SFO1 300.1318534 MHz  
 NUC1 1H  
 P1 15.00 usec  
 PLW1 8.00000000 W

F2 - Processing parameters  
 SI 32768  
 SF 300.1300066 MHz  
 WDW EM  
 SSB 0  
 LB 0.30 Hz  
 GB 0  
 PC 1.00

<sup>13</sup>C-NMR of **36** (75 MHz, CDCl<sub>3</sub>)

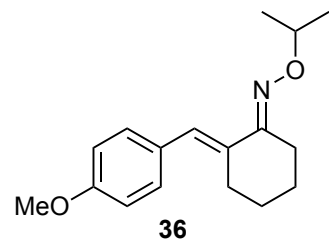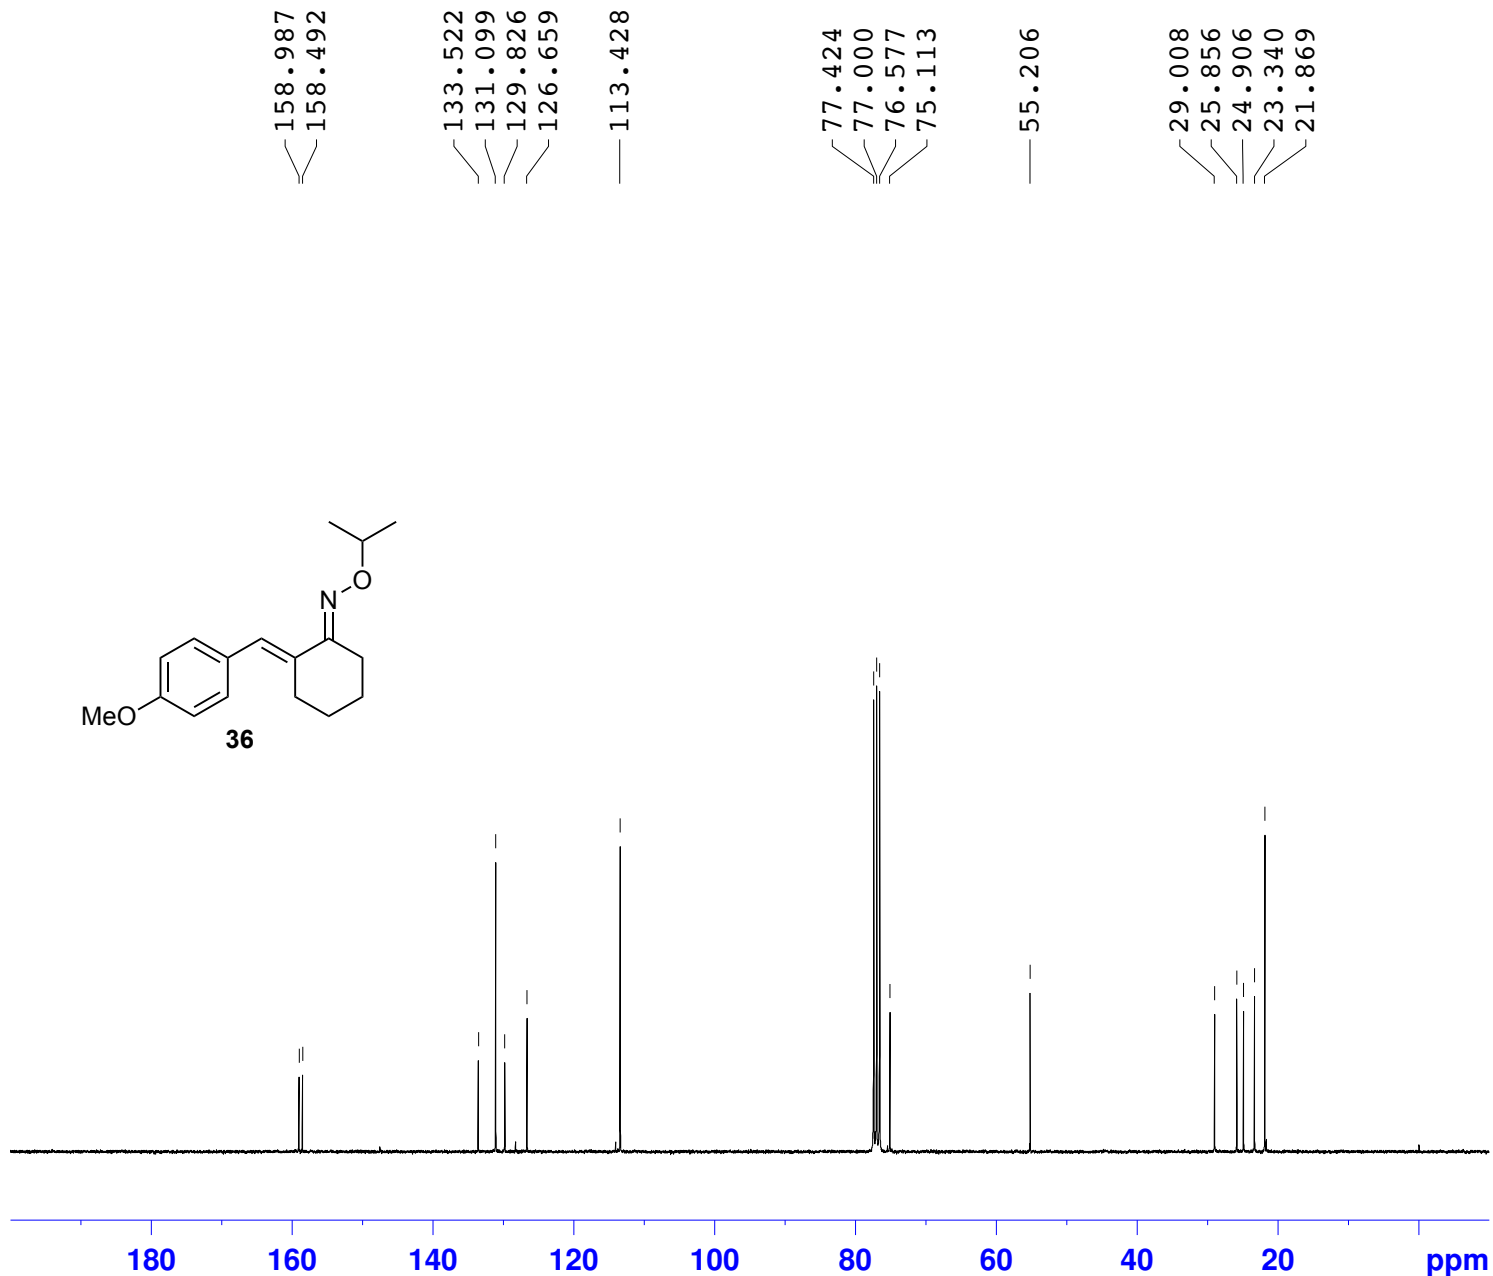

Current Data Parameters  
 NAME Yakka\_Yamada\_2  
 EXPNO 6671  
 PROCNO 1

F2 - Acquisition Parameters  
 Date\_ 20220306  
 Time\_ 3.31  
 INSTRUM spect  
 PROBHD 5 mm PABBO BB-  
 PULPROG zgpg30  
 TD 65536  
 SOLVENT CDCl3  
 NS 6000  
 DS 4  
 SWH 18028.846 Hz  
 FIDRES 0.275098 Hz  
 AQ 1.8175317 sec  
 RG 2050  
 DW 27.733 usec  
 DE 6.50 usec  
 TE 296.5 K  
 D1 2.00000000 sec  
 D11 0.03000000 sec  
 TD0 1

===== CHANNEL f1 =====  
 SFO1 75.4752953 MHz  
 NUC1 13C  
 P1 10.00 usec  
 PLW1 34.50000000 W

===== CHANNEL f2 =====  
 SFO2 300.1312005 MHz  
 NUC2 1H  
 CPDPRG[2] waltz16  
 PCPD2 80.00 usec  
 PLW2 8.00000000 W  
 PLW12 0.28125000 W  
 PLW13 0.18000001 W

F2 - Processing parameters  
 SI 32768  
 SF 75.4677505 MHz  
 WDW EM  
 SSB 0  
 LB 1.00 Hz  
 GB 0  
 PC 1.40

<sup>1</sup>H-NMR of **37** (300 MHz, CDCl<sub>3</sub>)

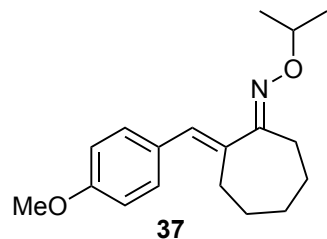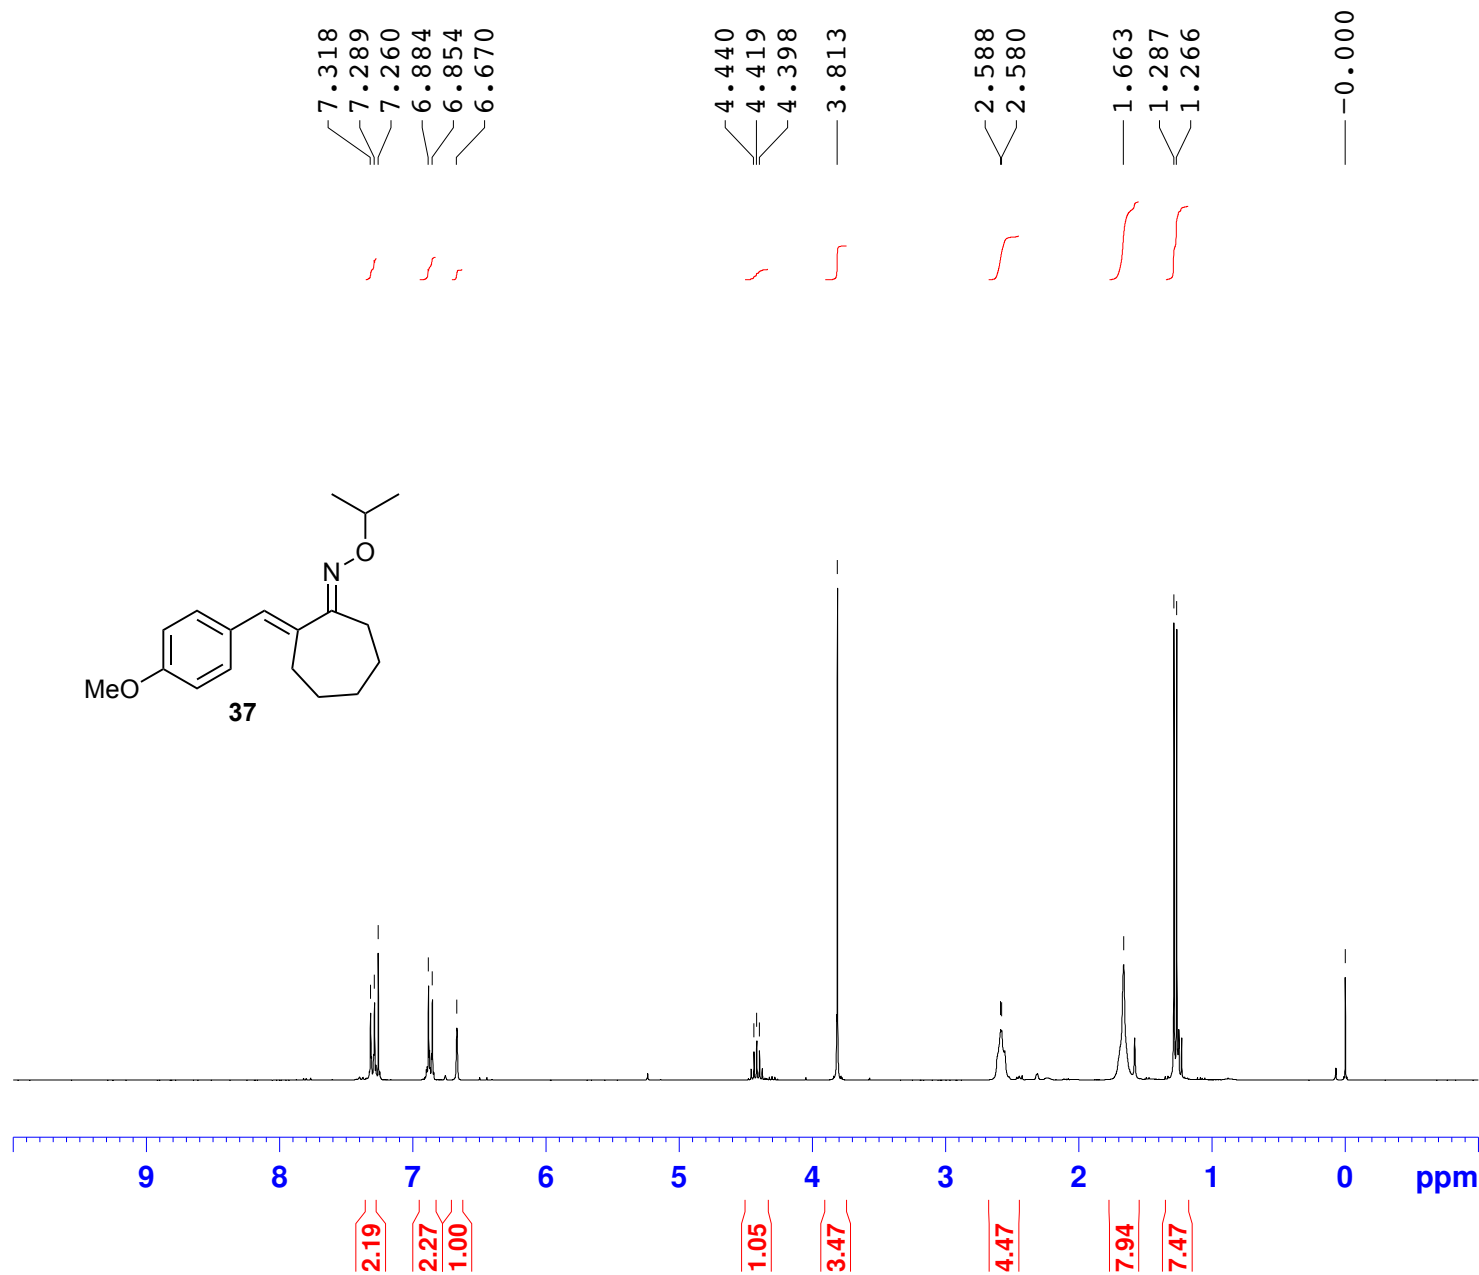

Current Data Parameters  
 NAME Yakka\_Yamada\_2  
 EXPNO 6720  
 PROCNO 1

F2 - Acquisition Parameters  
 Date\_ 20220312  
 Time 16.47  
 INSTRUM spect  
 PROBHD 5 mm PABBO BB-  
 PULPROG zg30  
 TD 65536  
 SOLVENT CDCl3  
 NS 16  
 DS 2  
 SWH 6188.119 Hz  
 FIDRES 0.094423 Hz  
 AQ 5.2953086 sec  
 RG 80.6  
 DW 80.800 usec  
 DE 6.50 usec  
 TE 294.7 K  
 D1 1.00000000 sec  
 TD0 1

==== CHANNEL f1 =====  
 SFO1 300.1318534 MHz  
 NUC1 1H  
 P1 15.00 usec  
 PLW1 8.00000000 W

F2 - Processing parameters  
 SI 32768  
 SF 300.1300058 MHz  
 WDW EM  
 SSB 0  
 LB 0.30 Hz  
 GB 0  
 PC 1.00



<sup>13</sup>C-NMR of **37** (75 MHz, CDCl<sub>3</sub>)

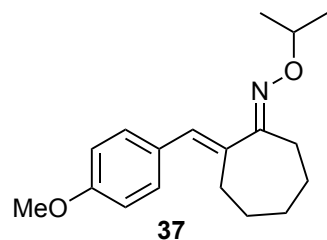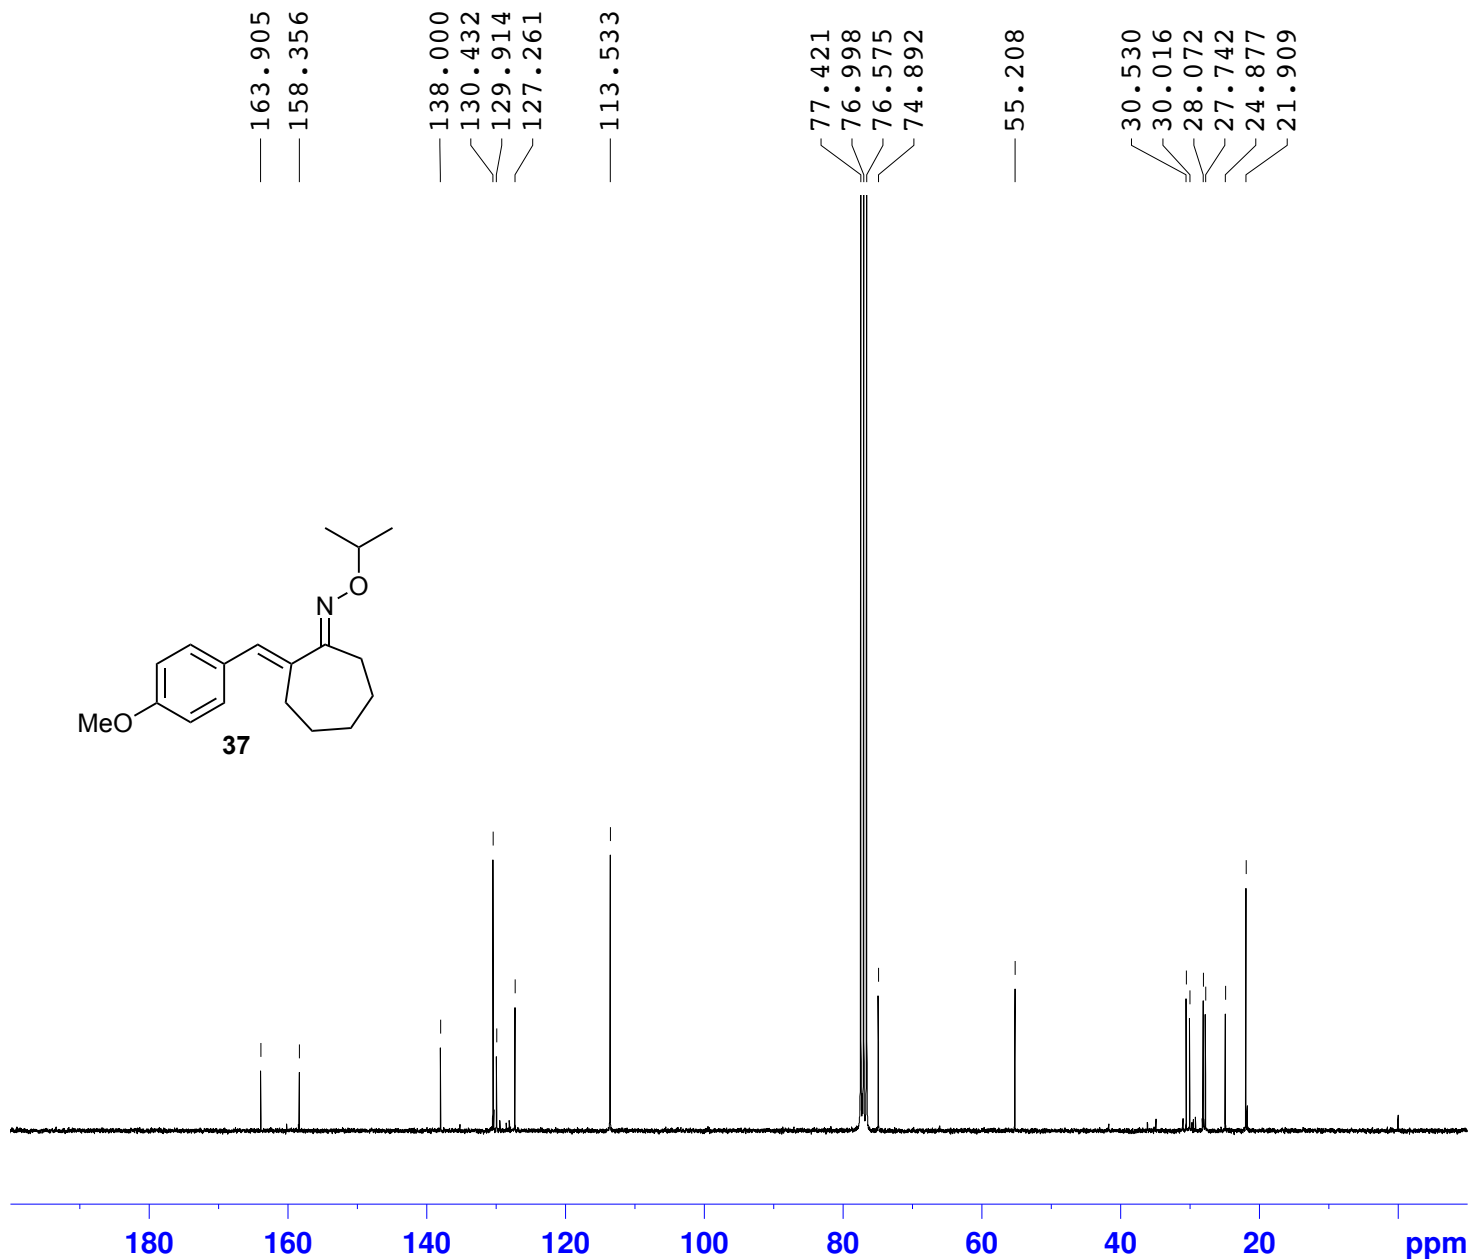

Current Data Parameters  
 NAME Yakka\_Yamada\_2  
 EXPNO 6722  
 PROCNO 1

F2 - Acquisition Parameters  
 Date\_ 20220313  
 Time 7.53  
 INSTRUM spect  
 PROBHD 5 mm PABBO BB-  
 PULPROG zgpg30  
 TD 65536  
 SOLVENT CDCl3  
 NS 10000  
 DS 4  
 SWH 18028.846 Hz  
 FIDRES 0.275098 Hz  
 AQ 1.8175317 sec  
 RG 2050  
 DW 27.733 usec  
 DE 6.50 usec  
 TE 296.5 K  
 D1 2.00000000 sec  
 D11 0.03000000 sec  
 TD0 1

==== CHANNEL f1 =====  
 SFO1 75.4752953 MHz  
 NUC1 13C  
 P1 10.00 usec  
 PLW1 34.5000000 W

==== CHANNEL f2 =====  
 SFO2 300.1312005 MHz  
 NUC2 1H  
 CPDPRG[2] waltz16  
 PCPD2 80.00 usec  
 PLW2 8.00000000 W  
 PLW12 0.28125000 W  
 PLW13 0.18000001 W

F2 - Processing parameters  
 SI 32768  
 SF 75.4677498 MHz  
 WDW EM  
 SSB 0  
 LB 1.00 Hz  
 GB 0  
 PC 1.40

<sup>1</sup>H-NMR of **38** (300 MHz, CDCl<sub>3</sub>)

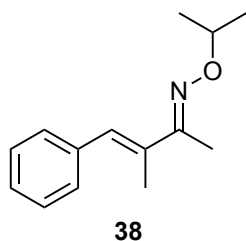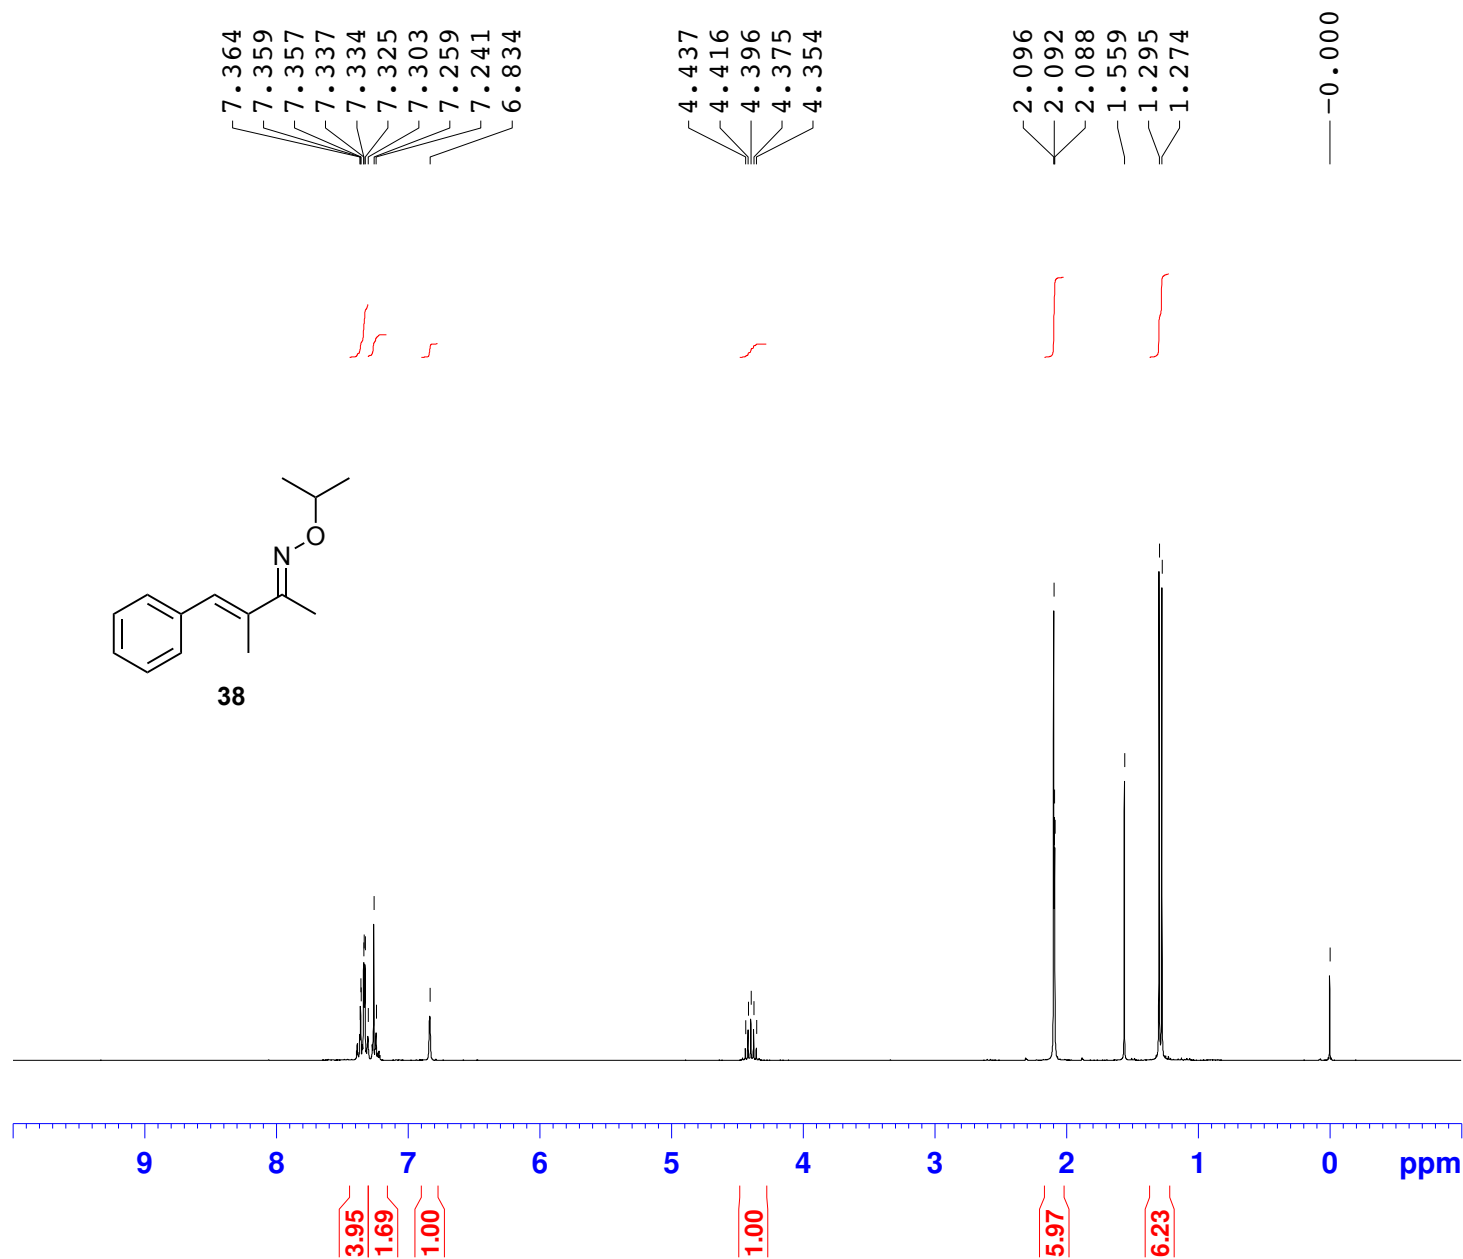

Current Data Parameters  
 NAME Yakka\_Yamada\_2  
 EXPNO 1830  
 PROCNO 1

F2 - Acquisition Parameters  
 Date\_ 20200314  
 Time 18.33  
 INSTRUM spect  
 PROBHD 5 mm PABBO BB-  
 PULPROG zg30  
 TD 65536  
 SOLVENT CDCl3  
 NS 16  
 DS 2  
 SWH 6188.119 Hz  
 FIDRES 0.094423 Hz  
 AQ 5.2953086 sec  
 RG 114  
 DW 80.800 usec  
 DE 6.50 usec  
 TE 294.5 K  
 D1 1.00000000 sec  
 TD0 1

===== CHANNEL f1 =====  
 SFO1 300.1318534 MHz  
 NUC1 1H  
 P1 15.00 usec  
 PLW1 6.19999981 W

F2 - Processing parameters  
 SI 32768  
 SF 300.1300070 MHz  
 WDW EM  
 SSB 0  
 LB 0.30 Hz  
 GB 0  
 PC 1.00

<sup>13</sup>C-NMR of **38** (75 MHz, CDCl<sub>3</sub>)

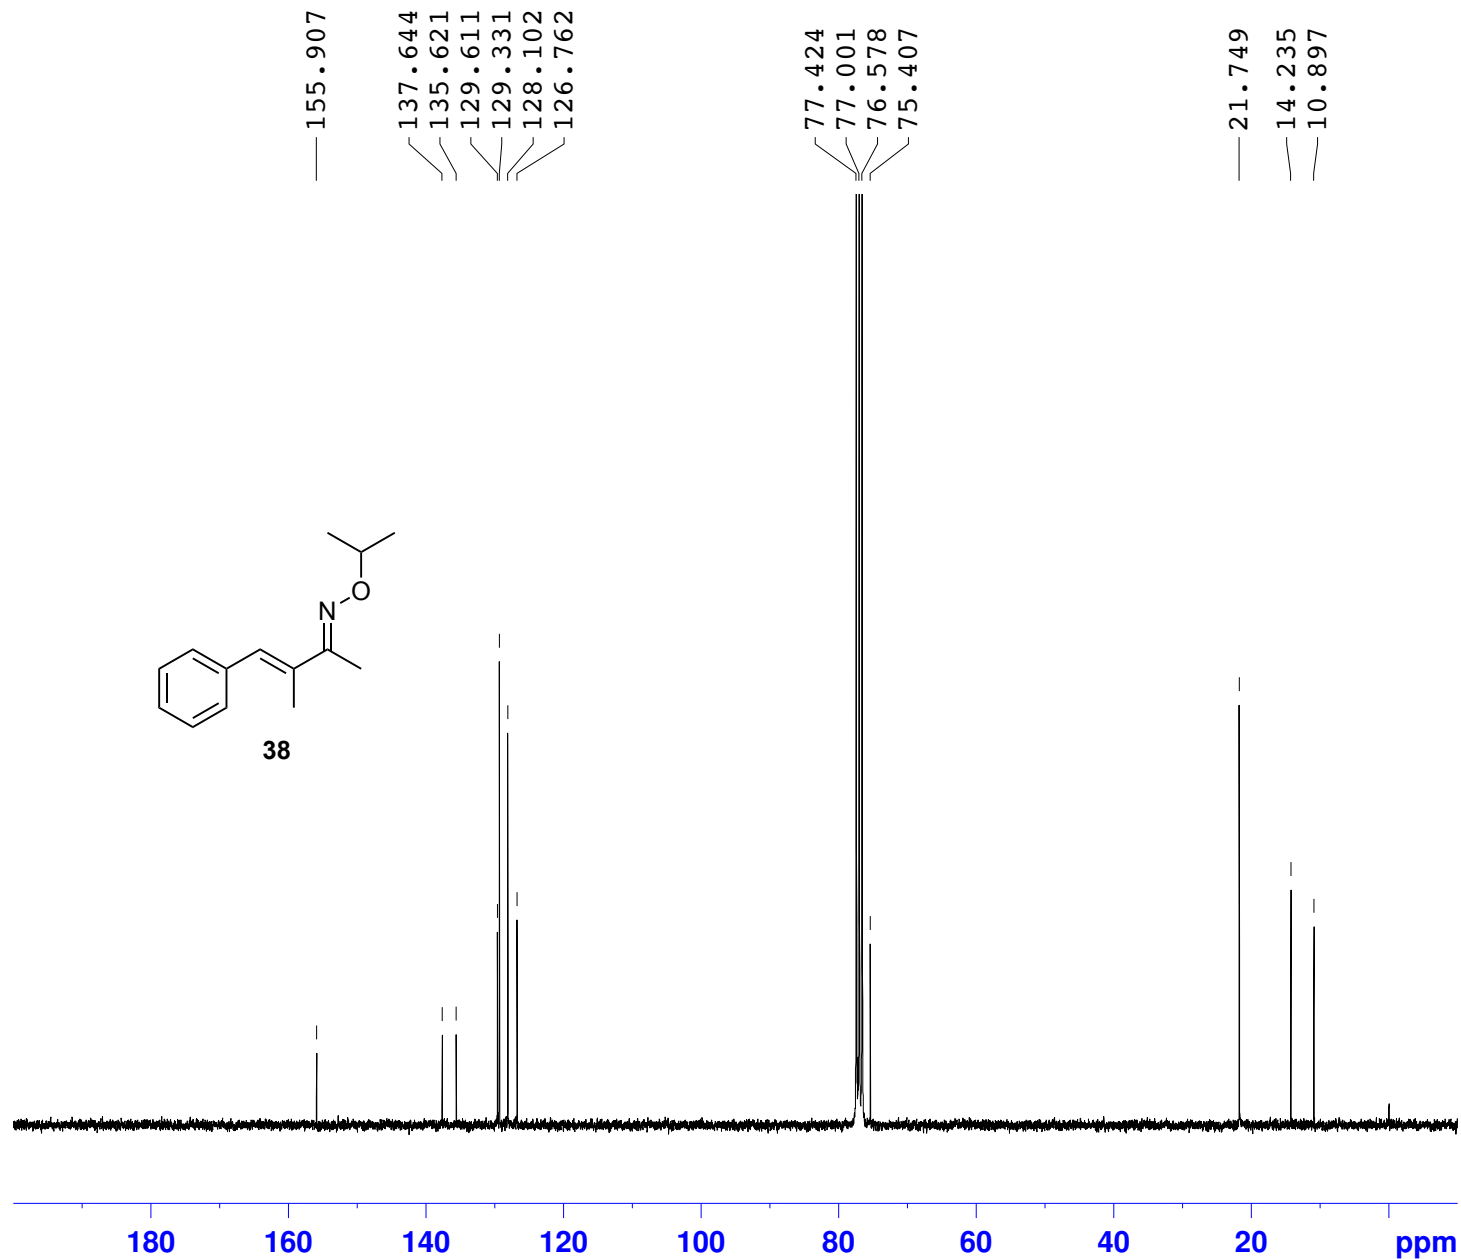

Current Data Parameters  
NAME Yakka\_Yamada\_2  
EXPNO 1831  
PROCNO 1

F2 - Acquisition Parameters  
Date\_ 20200315  
Time\_ 5.56  
INSTRUM spect  
PROBHD 5 mm PABBO BB-  
PULPROG zgpg30  
TD 65536  
SOLVENT CDCl3  
NS 8192  
DS 4  
SWH 18028.846 Hz  
FIDRES 0.275098 Hz  
AQ 1.8175317 sec  
RG 2050  
DW 27.733 usec  
DE 6.50 usec  
TE 296.0 K  
D1 2.00000000 sec  
D11 0.03000000 sec  
TD0 1

==== CHANNEL f1 =====  
SFO1 75.4752953 MHz  
NUC1 13C  
P1 10.00 usec  
PLW1 34.20000076 W

==== CHANNEL f2 =====  
SFO2 300.1312005 MHz  
NUC2 1H  
CPDPRG[2] waltz16  
PCPD2 80.00 usec  
PLW2 6.19999981 W  
PLW12 0.17000000 W  
PLW13 0.13950001 W

F2 - Processing parameters  
SI 32768  
SF 75.4677498 MHz  
WDW EM  
SSB 0  
LB 1.00 Hz  
GB 0  
PC 1.40

<sup>1</sup>H-NMR of **39** (300 MHz, CDCl<sub>3</sub>)

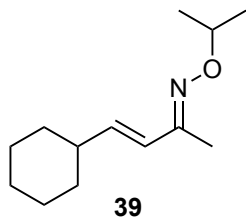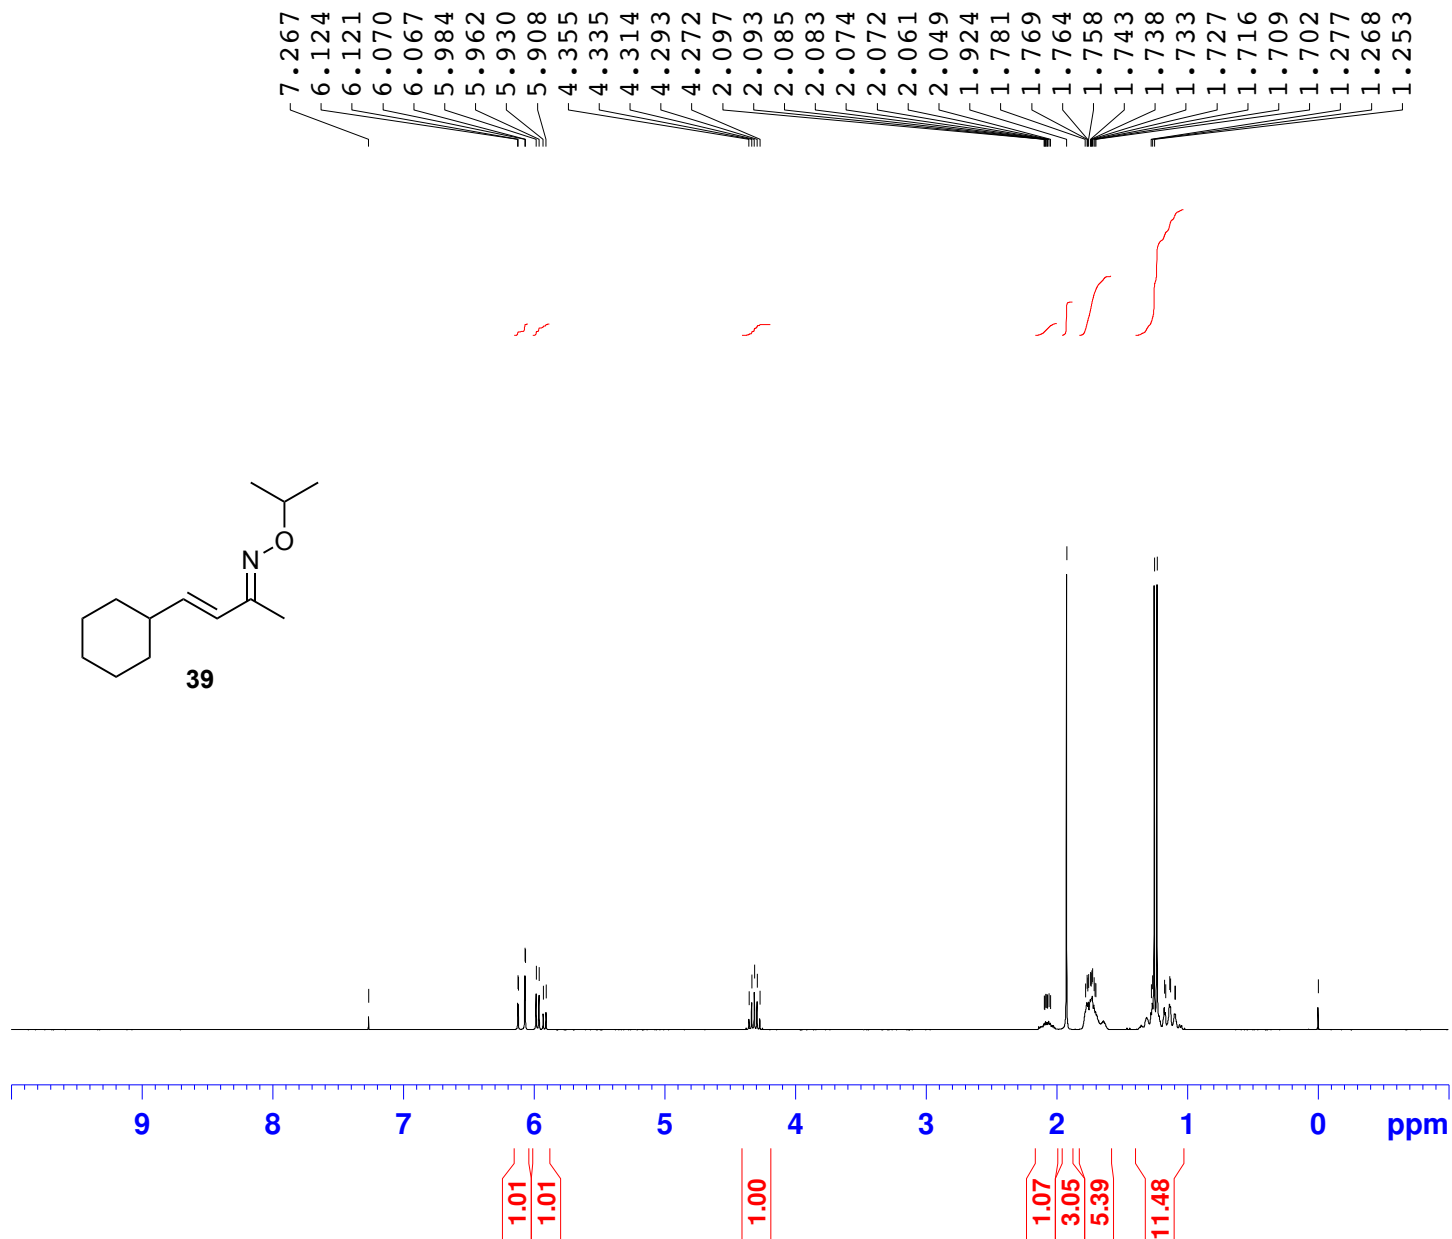

Current Data Parameters  
 NAME Yakka\_Yamada\_2  
 EXPNO 2120  
 PROCNO 1

F2 - Acquisition Parameters  
 Date\_ 20200625  
 Time 7.43  
 INSTRUM spect  
 PROBHD 5 mm PABBO BB-  
 PULPROG zg30  
 TD 65536  
 SOLVENT CDCl3  
 NS 16  
 DS 2  
 SWH 6188.119 Hz  
 FIDRES 0.094423 Hz  
 AQ 5.2953086 sec  
 RG 20.2  
 DW 80.800 usec  
 DE 6.50 usec  
 TE 294.8 K  
 D1 1.00000000 sec  
 TD0 1

==== CHANNEL f1 =====  
 SFO1 300.1318534 MHz  
 NUC1 1H  
 P1 15.00 usec  
 PLW1 6.19999981 W

F2 - Processing parameters  
 SI 32768  
 SF 300.1300042 MHz  
 WDW EM  
 SSB 0  
 LB 0.30 Hz  
 GB 0  
 PC 1.00

<sup>13</sup>C-NMR of **39** (75 MHz, CDCl<sub>3</sub>)

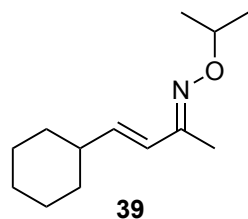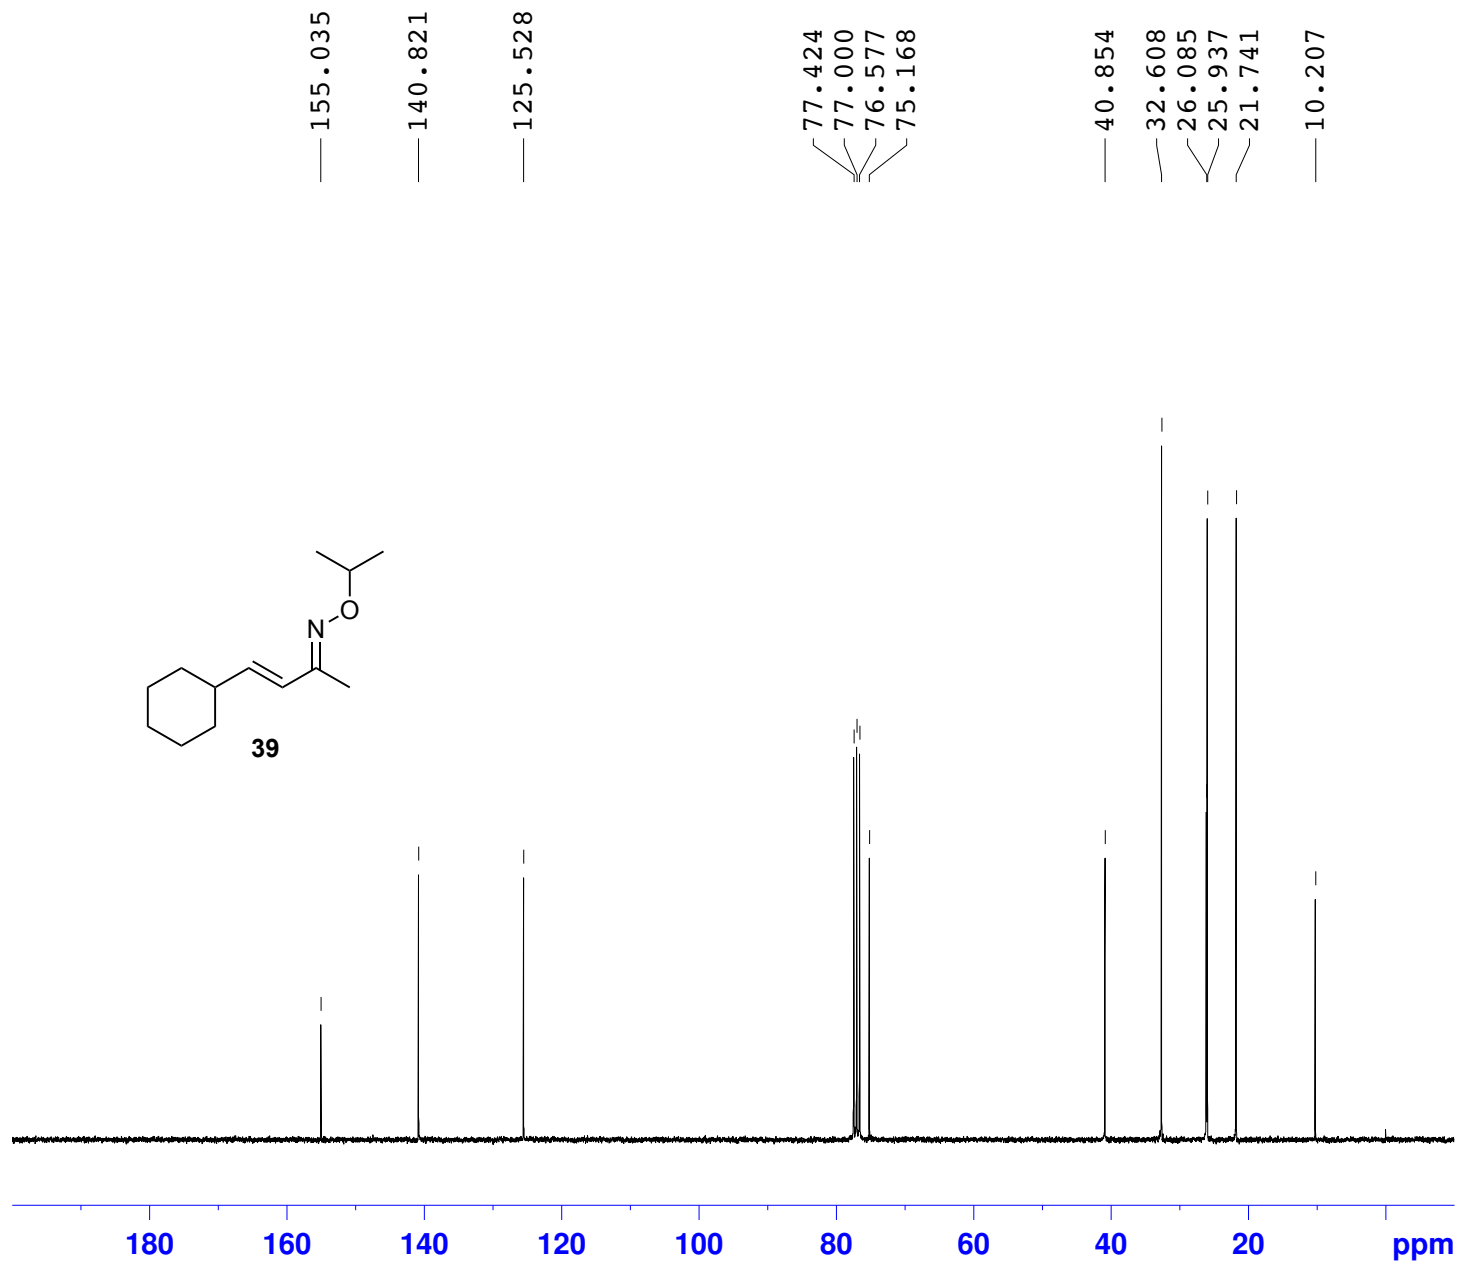

Current Data Parameters  
 NAME Yakka\_Yamada\_2  
 EXPNO 2122  
 PROCNO 1

F2 - Acquisition Parameters  
 Date\_ 20200625  
 Time 9.01  
 INSTRUM spect  
 PROBHD 5 mm PABBO BB-  
 PULPROG zgpg30  
 TD 65536  
 SOLVENT CDCl3  
 NS 1024  
 DS 4  
 SWH 18028.846 Hz  
 FIDRES 0.275098 Hz  
 AQ 1.8175317 sec  
 RG 2050  
 DW 27.733 usec  
 DE 6.50 usec  
 TE 296.1 K  
 D1 2.00000000 sec  
 D11 0.03000000 sec  
 TD0 1

==== CHANNEL f1 =====  
 SFO1 75.4752953 MHz  
 NUC1 13C  
 P1 10.00 usec  
 PLW1 34.20000076 W

==== CHANNEL f2 =====  
 SFO2 300.1312005 MHz  
 NUC2 1H  
 CPDPRG[2] waltz16  
 PCPD2 80.00 usec  
 PLW2 6.19999981 W  
 PLW12 0.17000000 W  
 PLW13 0.13950001 W

F2 - Processing parameters  
 SI 32768  
 SF 75.4677503 MHz  
 WDW EM  
 SSB 0  
 LB 1.00 Hz  
 GB 0  
 PC 1.40

<sup>1</sup>H-NMR of **40** (300 MHz, CDCl<sub>3</sub>)

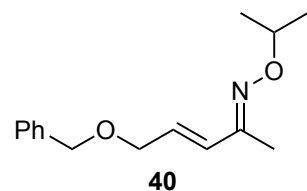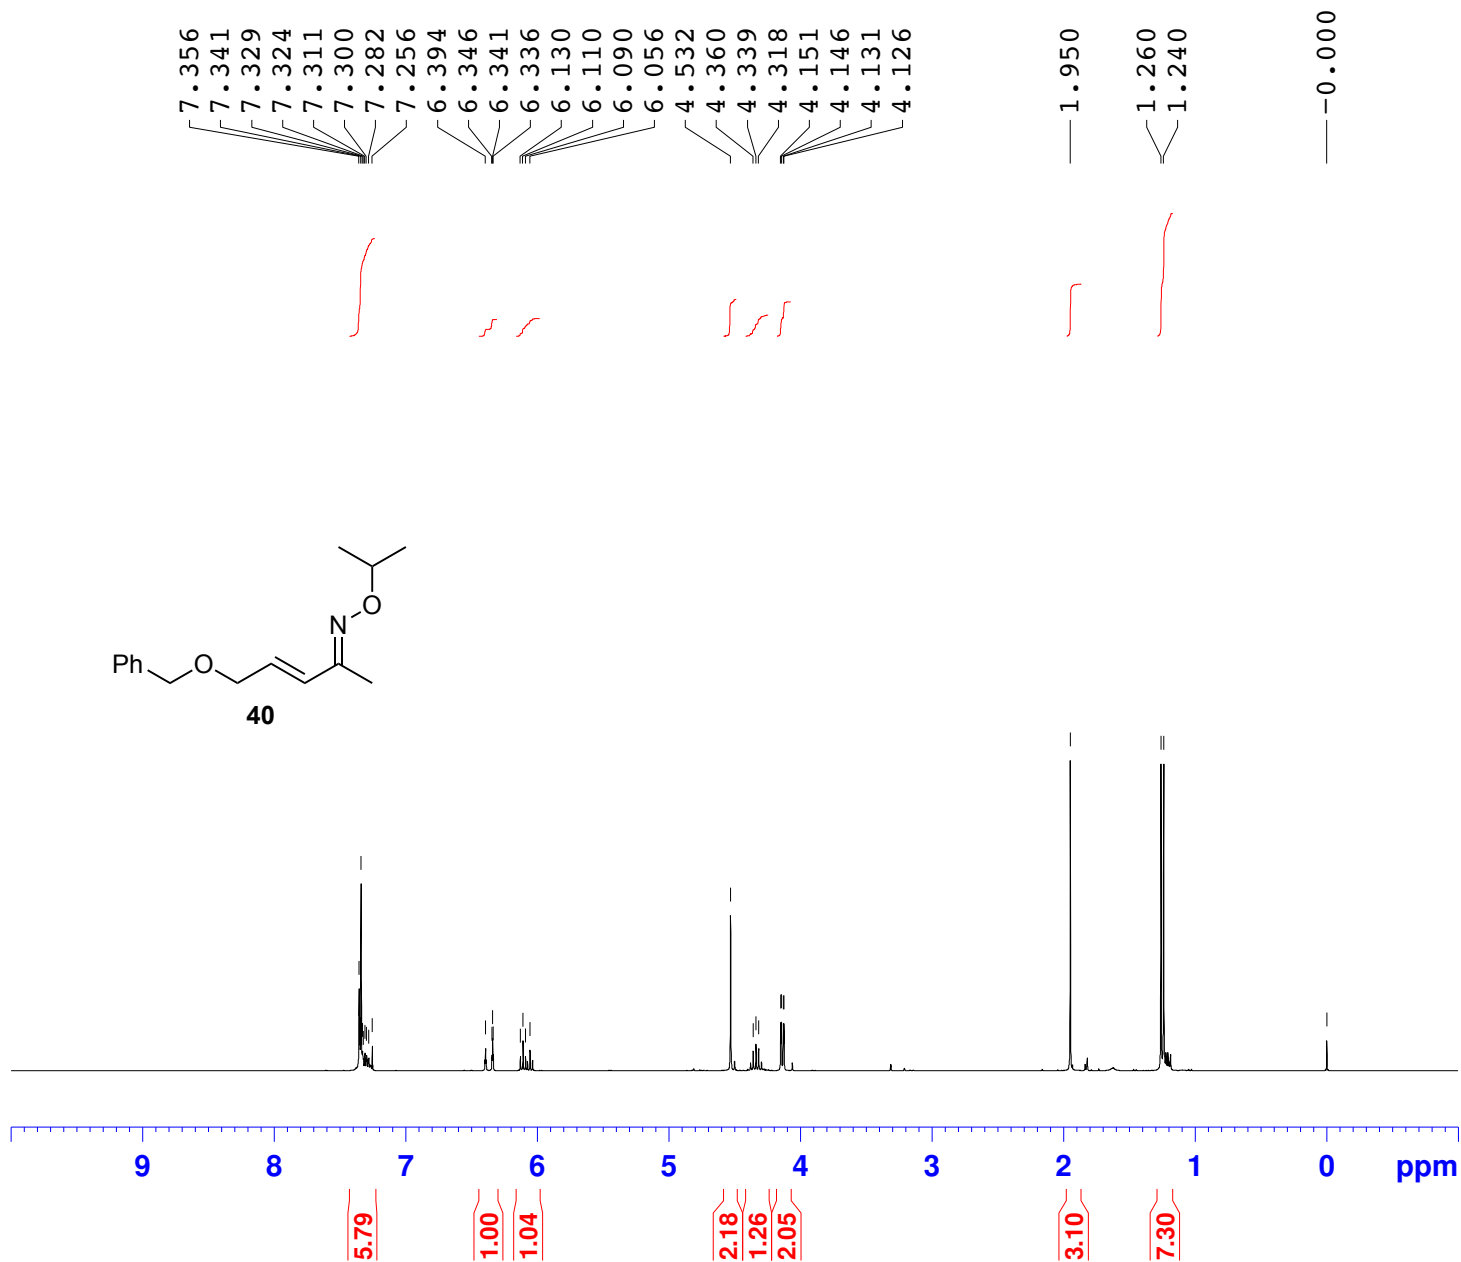

Current Data Parameters  
 NAME Yakka\_Yamada\_2  
 EXPNO 4470  
 PROCNO 1

F2 - Acquisition Parameters  
 Date\_ 20210313  
 Time 17.58  
 INSTRUM spect  
 PROBHD 5 mm PABBO BB-  
 PULPROG zg30  
 TD 65536  
 SOLVENT CDCl3  
 NS 16  
 DS 2  
 SWH 6188.119 Hz  
 FIDRES 0.094423 Hz  
 AQ 5.2953086 sec  
 RG 45.2  
 DW 80.800 usec  
 DE 6.50 usec  
 TE 294.6 K  
 D1 1.00000000 sec  
 TD0 1

==== CHANNEL f1 =====  
 SFO1 300.1318534 MHz  
 NUC1 1H  
 P1 15.00 usec  
 PLW1 6.19999981 W

F2 - Processing parameters  
 SI 32768  
 SF 300.130078 MHz  
 WDW EM  
 SSB 0  
 LB 0.30 Hz  
 GB 0  
 PC 1.00

<sup>13</sup>C-NMR of **40** (75 MHz, CDCl<sub>3</sub>)

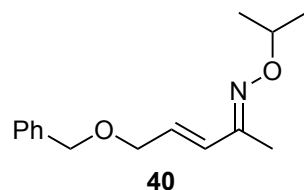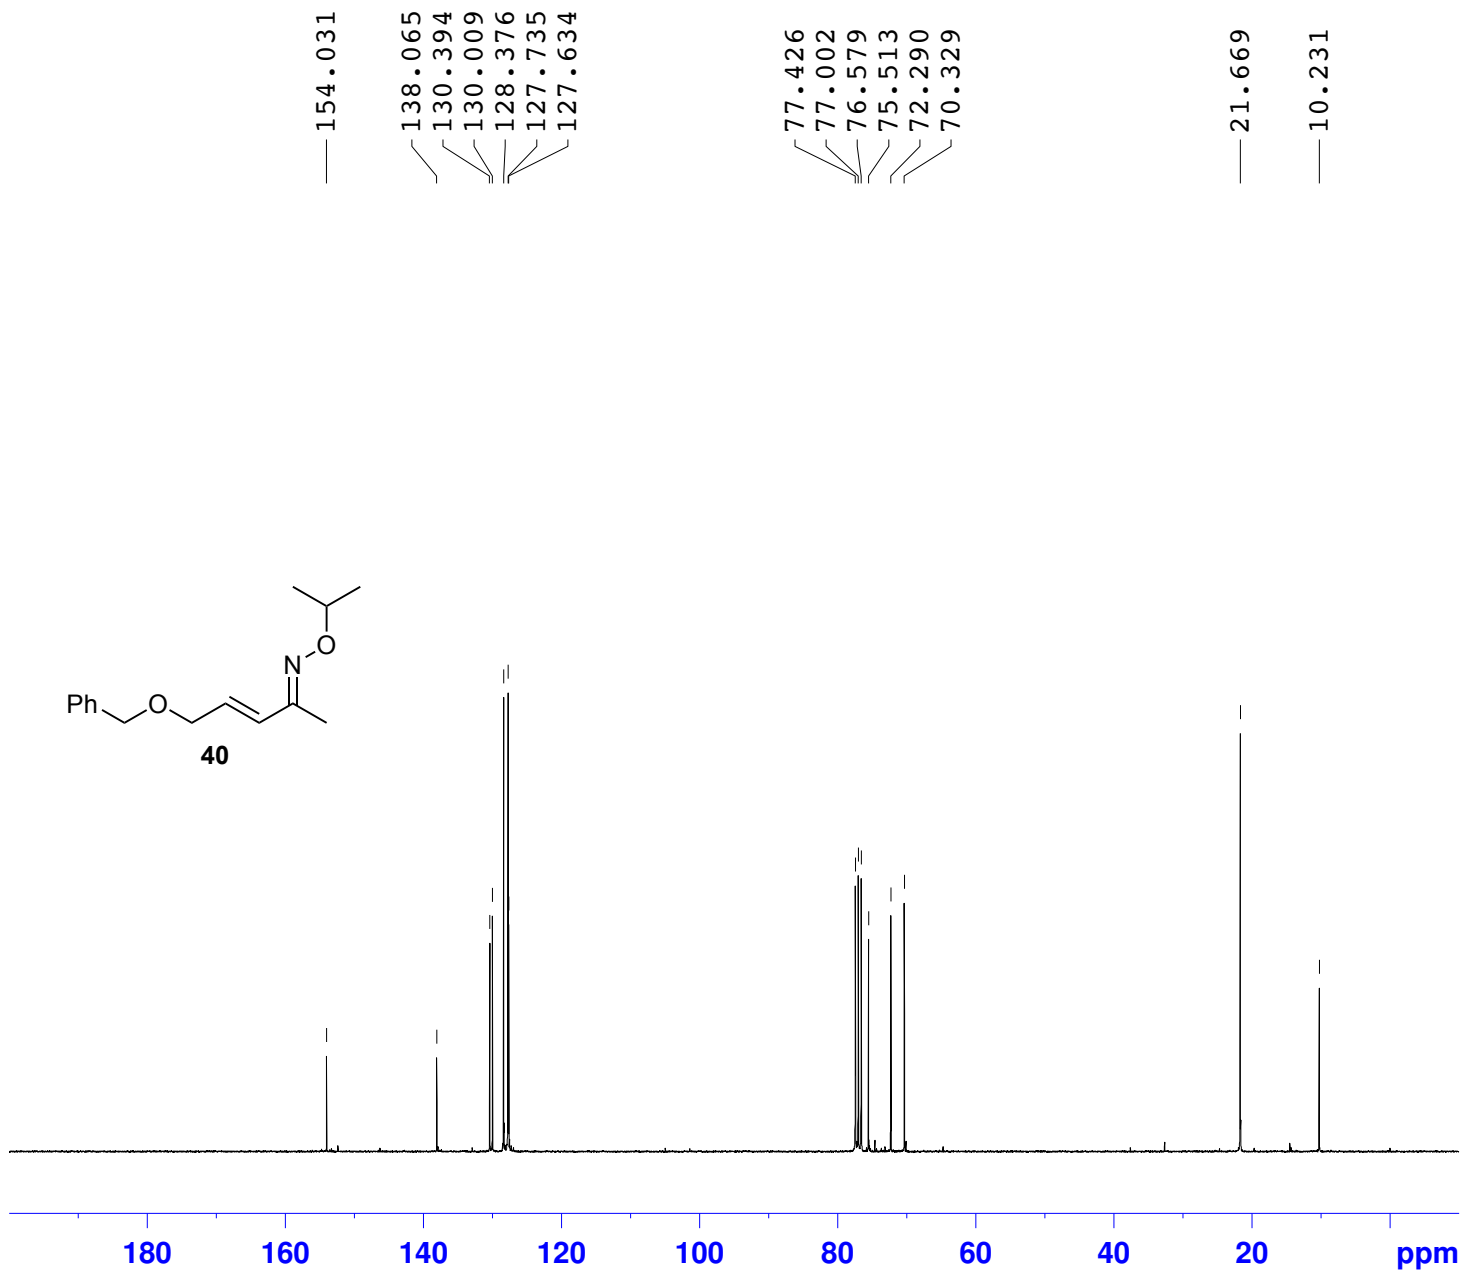

```

Current Data Parameters
NAME      Yakka_Yamada_2
EXPNO     4501
PROCNO    1

F2 - Acquisition Parameters
Date_     20210321
Time      14.42
INSTRUM   spect
PROBHD    5 mm PABBO BB-
PULPROG   zgpg30
TD         65536
SOLVENT   CDCl3
NS         8000
DS         4
SWH       18028.846 Hz
FIDRES    0.275098 Hz
AQ         1.8175317 sec
RG         2050
DW         27.733 usec
DE         6.50 usec
TE         296.2 K
D1         2.00000000 sec
D11        0.03000000 sec
TD0        1

===== CHANNEL f1 =====
SFO1      75.4752953 MHz
NUC1       13C
P1         10.00 usec
PLW1      34.5000000 W

===== CHANNEL f2 =====
SFO2      300.1312005 MHz
NUC2       1H
CPDPRG[2  waltz16
PCPD2      80.00 usec
PLW2       6.19999981 W
PLW12      0.21797000 W
PLW13      0.13950001 W

F2 - Processing parameters
SI         32768
SF         75.4677525 MHz
WDW        EM
SSB        0
LB         1.00 Hz
GB         0
PC         1.40
    
```

<sup>1</sup>H-NMR of **41** (300 MHz, CDCl<sub>3</sub>)

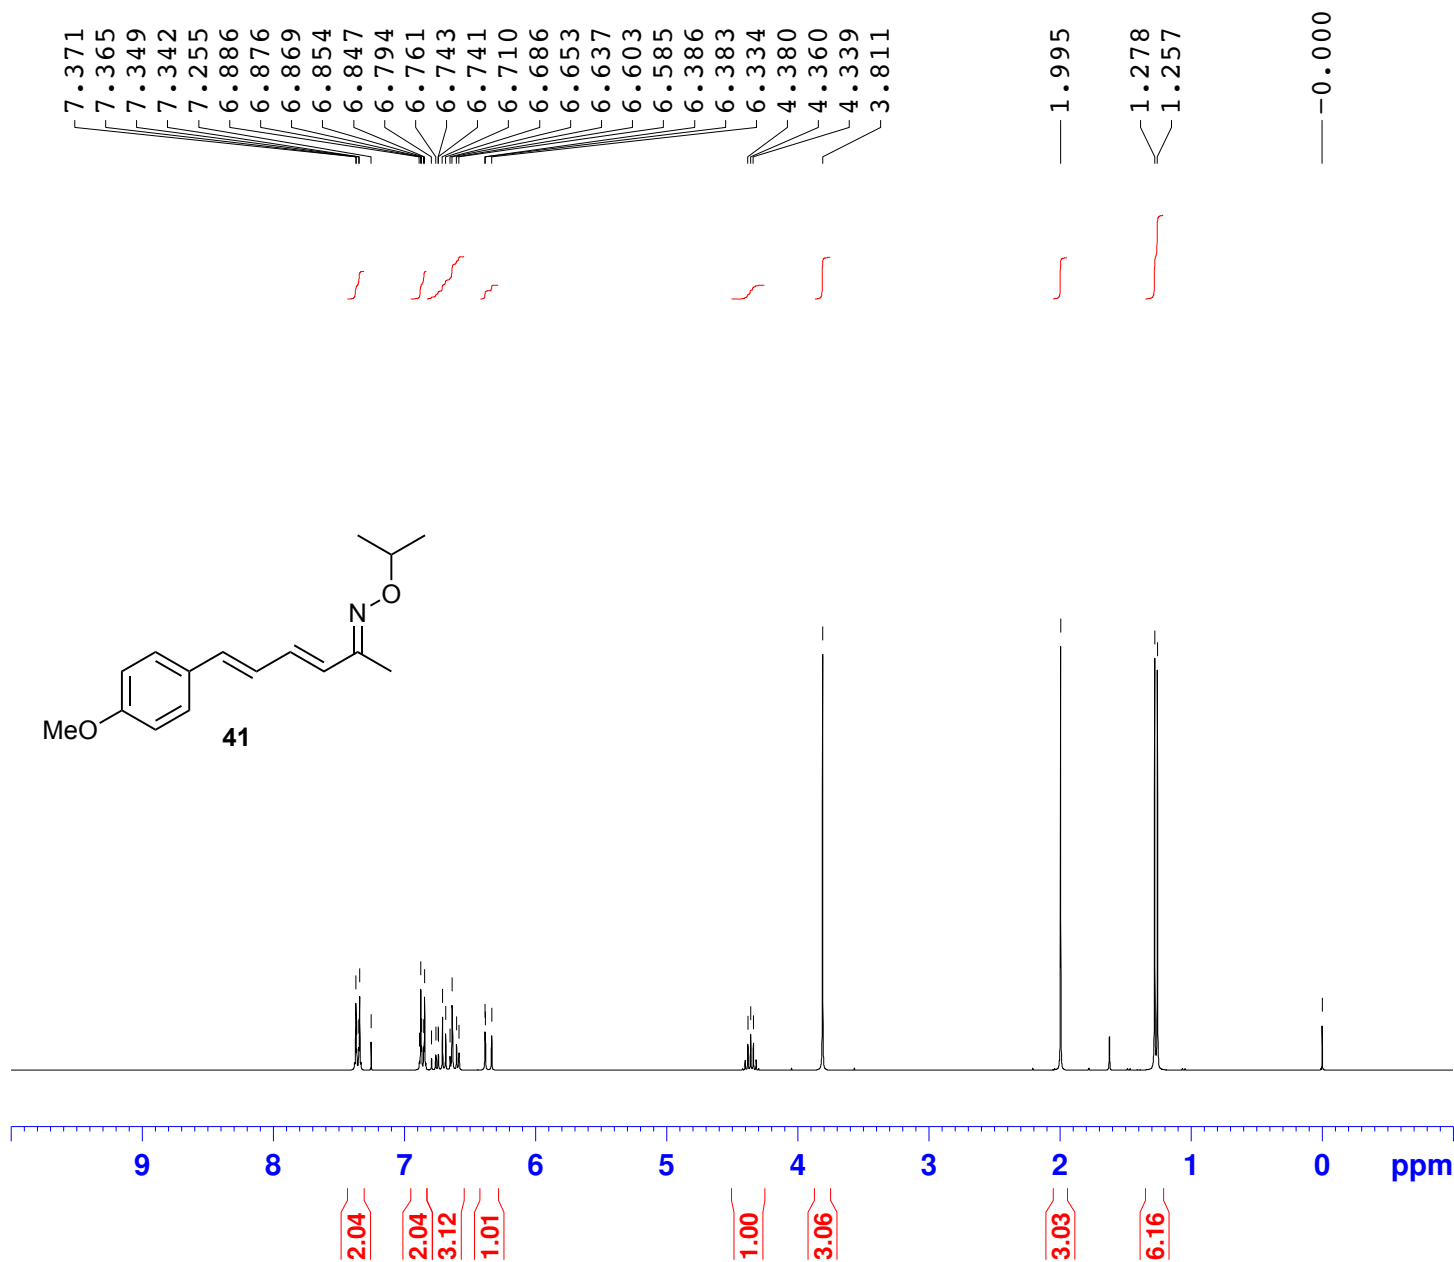

```

Current Data Parameters
NAME      Yakka_Yamada_2
EXPNO     3140
PROCNO    1

F2 - Acquisition Parameters
Date_     20200817
Time      8.32
INSTRUM   spect
PROBHD    5 mm PABBO BB-
PULPROG   zg30
TD         65536
SOLVENT   CDCl3
NS         16
DS         2
SWH        6188.119 Hz
FIDRES     0.094423 Hz
AQ         5.2953086 sec
RG         45.2
DW         80.800 usec
DE         6.50 usec
TE         295.6 K
D1         1.00000000 sec
TD0        1

===== CHANNEL f1 =====
SFO1      300.1318534 MHz
NUC1       1H
P1         15.00 usec
PLW1       6.19999981 W

F2 - Processing parameters
SI         32768
SF         300.1300068 MHz
WDW        EM
SSB        0
LB         0.30 Hz
GB         0
PC         1.00
    
```



<sup>13</sup>C-NMR of **41** (75 MHz, CDCl<sub>3</sub>)

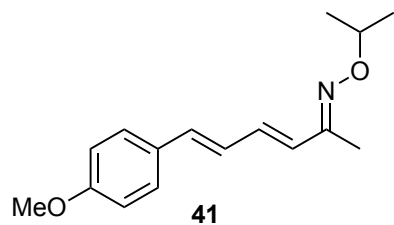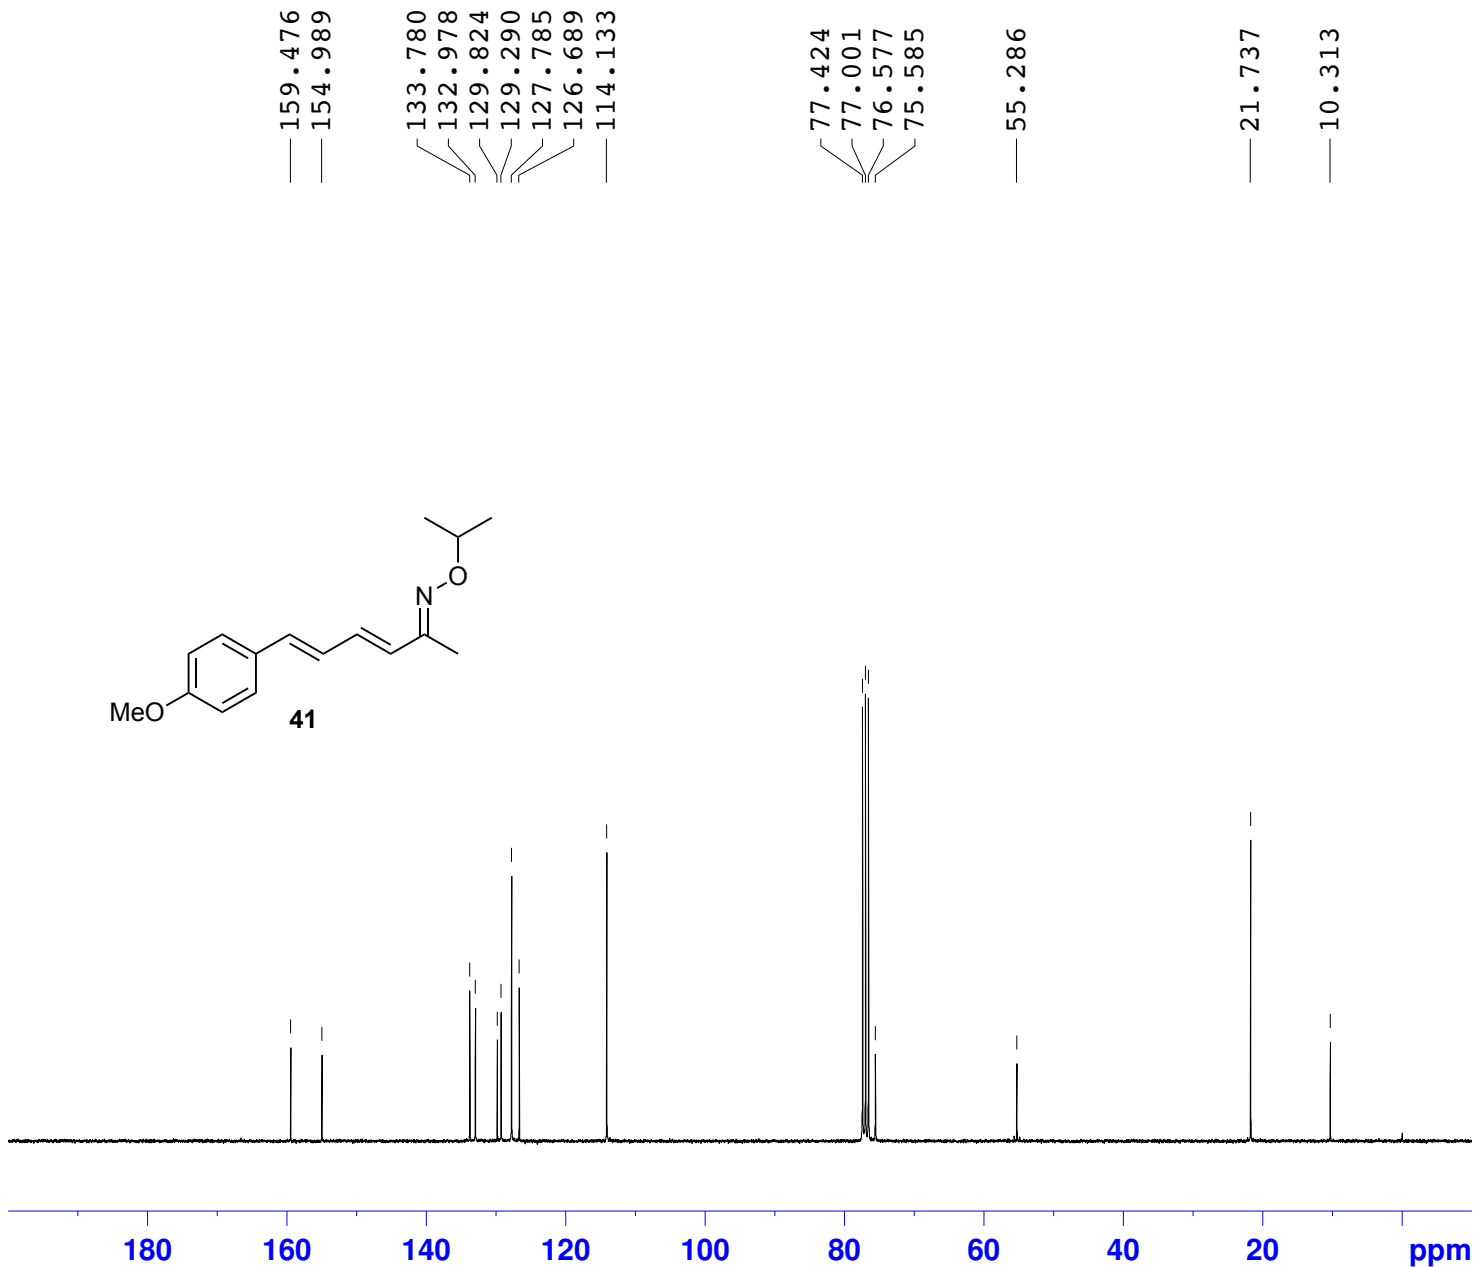

Current Data Parameters  
 NAME Yakka\_Yamada\_2  
 EXPNO 3142  
 PROCNO 1

F2 - Acquisition Parameters  
 Date\_ 20200817  
 Time 8.30  
 INSTRUM spect  
 PROBHD 5 mm PABBO BB-  
 PULPROG zgpg30  
 TD 65536  
 SOLVENT CDCl3  
 NS 4096  
 DS 4  
 SWH 18028.846 Hz  
 FIDRES 0.275098 Hz  
 AQ 1.8175317 sec  
 RG 2050  
 DW 27.733 usec  
 DE 6.50 usec  
 TE 296.2 K  
 D1 2.0000000 sec  
 D11 0.03000000 sec  
 TD0 1

==== CHANNEL f1 =====  
 SFO1 75.4752953 MHz  
 NUC1 13C  
 P1 10.00 usec  
 PLW1 34.20000076 W

==== CHANNEL f2 =====  
 SFO2 300.1312005 MHz  
 NUC2 1H  
 CPDPRG[2] waltz16  
 PCPD2 80.00 usec  
 PLW2 6.19999981 W  
 PLW12 0.17000000 W  
 PLW13 0.13950001 W

F2 - Processing parameters  
 SI 32768  
 SF 75.4677510 MHz  
 WDW EM  
 SSB 0  
 LB 1.00 Hz  
 GB 0  
 PC 1.40

<sup>1</sup>H-NMR of **74** (300 MHz, CDCl<sub>3</sub>)

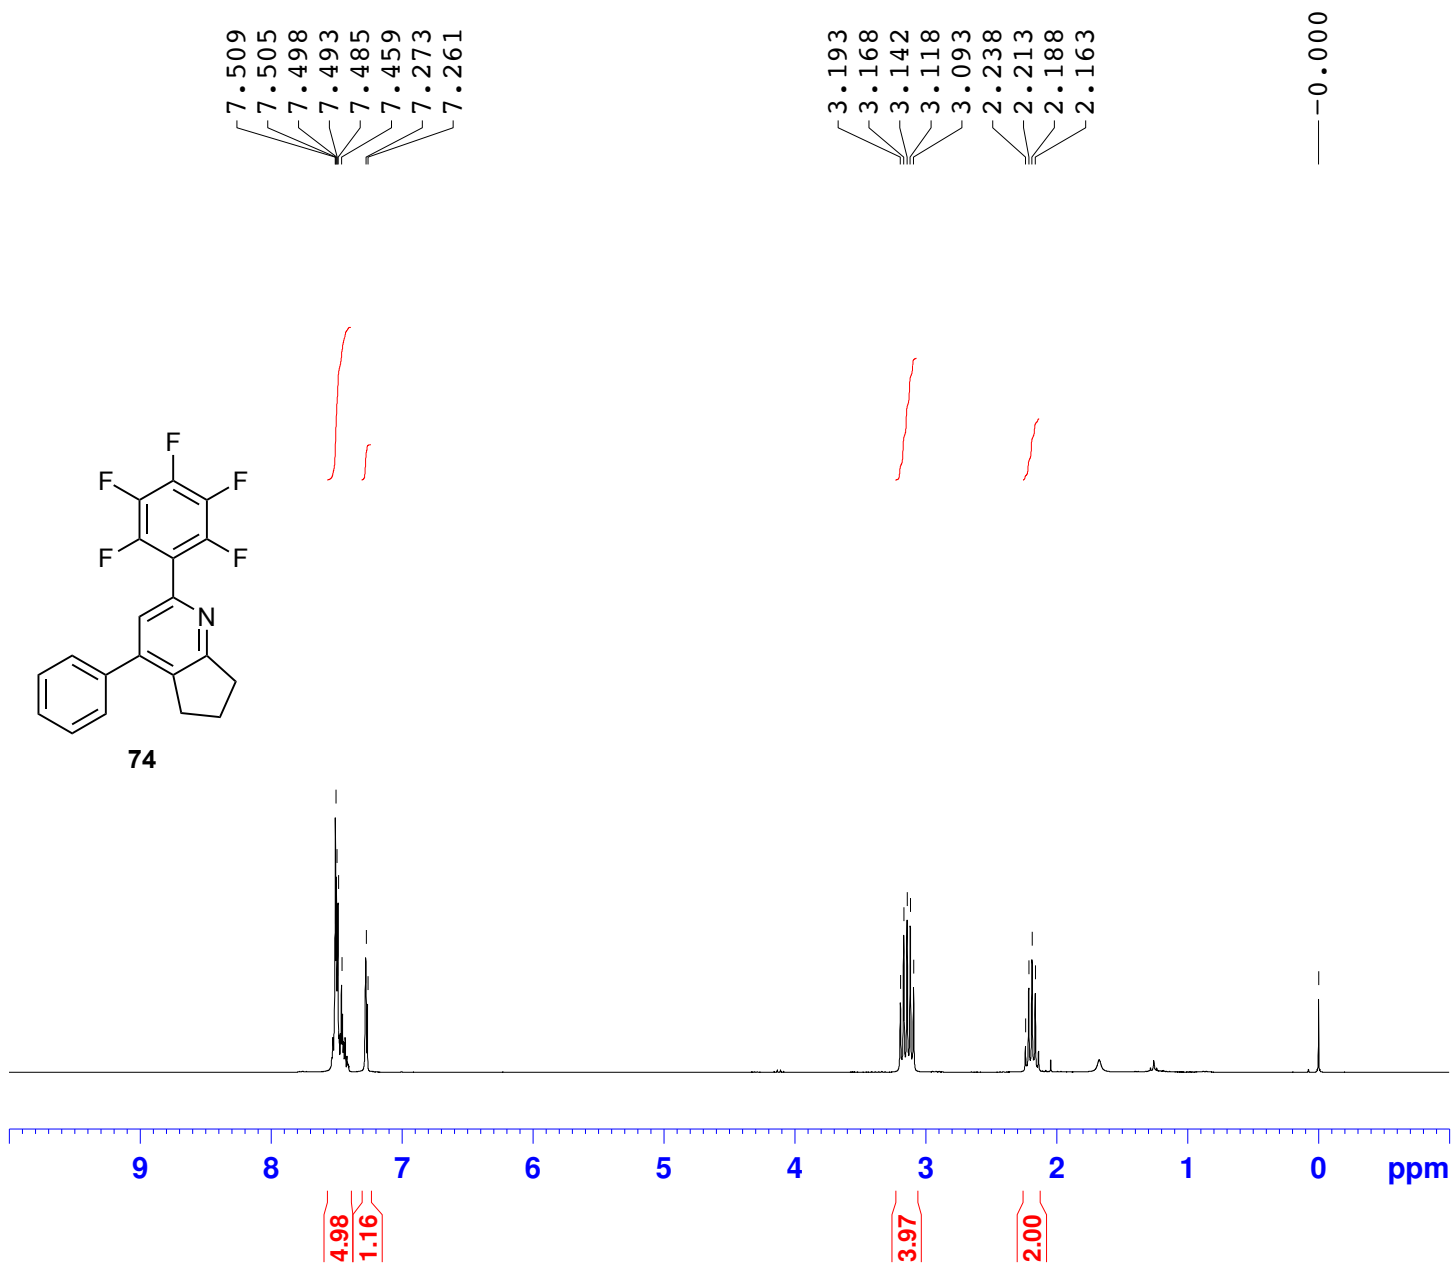

Current Data Parameters  
 NAME Yakka\_Yamada\_2  
 EXPNO 4690  
 PROCNO 1

F2 - Acquisition Parameters  
 Date\_ 20210605  
 Time 18.52  
 INSTRUM spect  
 PROBHD 5 mm PABBO BB-  
 PULPROG zg30  
 TD 65536  
 SOLVENT CDCl3  
 NS 16  
 DS 2  
 SWH 6188.119 Hz  
 FIDRES 0.094423 Hz  
 AQ 5.2953086 sec  
 RG 80.6  
 DW 80.800 usec  
 DE 6.50 usec  
 TE 294.8 K  
 D1 1.00000000 sec  
 TD0 1

==== CHANNEL f1 =====  
 SFO1 300.1318534 MHz  
 NUC1 1H  
 P1 15.00 usec  
 PLW1 6.19999981 W

F2 - Processing parameters  
 SI 32768  
 SF 300.1300055 MHz  
 WDW EM  
 SSB 0  
 LB 0.30 Hz  
 GB 0  
 PC 1.00

<sup>13</sup>C-NMR of **74** (75 MHz, CDCl<sub>3</sub>)

167.370  
146.340  
146.287  
146.005  
144.693  
143.038  
142.985  
139.476  
139.430  
139.304  
137.964  
136.080  
135.290  
128.734  
128.647  
128.165  
122.974  
115.845  
115.793

77.422  
76.999  
76.575

34.604  
30.807  
23.372

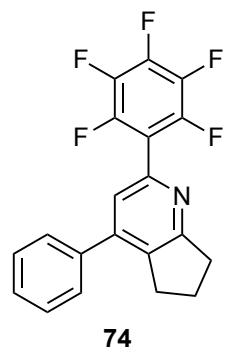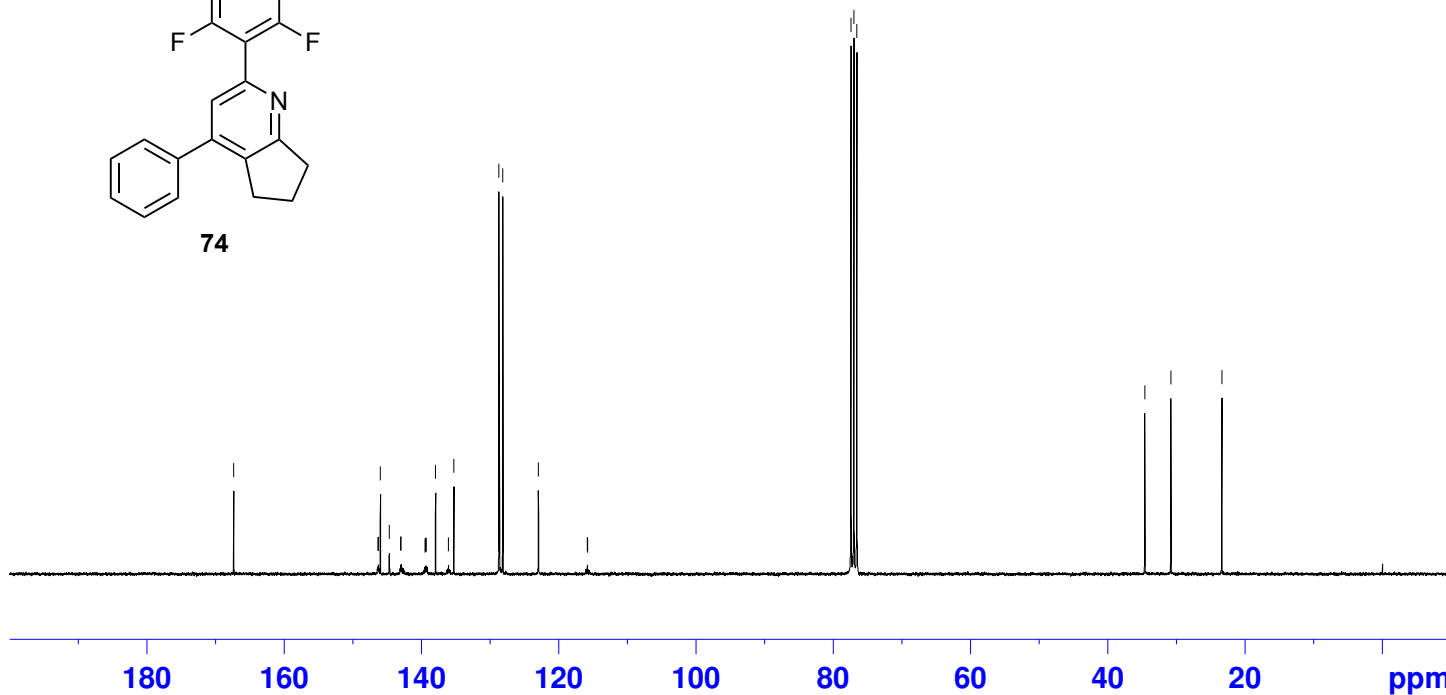

Current Data Parameters  
NAME Yakka\_Yamada\_2  
EXPNO 4692  
PROCNO 1

F2 - Acquisition Parameters  
Date\_ 20210606  
Time 5.57  
INSTRUM spect  
PROBHD 5 mm PABBO BB-  
PULPROG zgpg30  
TD 65536  
SOLVENT CDCl3  
NS 8192  
DS 4  
SWH 18028.846 Hz  
FIDRES 0.275098 Hz  
AQ 1.8175317 sec  
RG 2050  
DW 27.733 usec  
DE 6.50 usec  
TE 296.3 K  
D1 2.00000000 sec  
D11 0.03000000 sec  
TD0 1

===== CHANNEL f1 =====  
SFO1 75.4752953 MHz  
NUC1 13C  
P1 10.00 usec  
PLW1 34.50000000 W

===== CHANNEL f2 =====  
SFO2 300.1312005 MHz  
NUC2 1H  
CPDPRG[2] waltz16  
PCPD2 80.00 usec  
PLW2 6.19999981 W  
PLW12 0.21797000 W  
PLW13 0.13950001 W

F2 - Processing parameters  
SI 32768  
SF 75.4677503 MHz  
WDW EM  
SSB 0  
LB 1.00 Hz  
GB 0  
PC 1.40

HSQC spectrum of **74**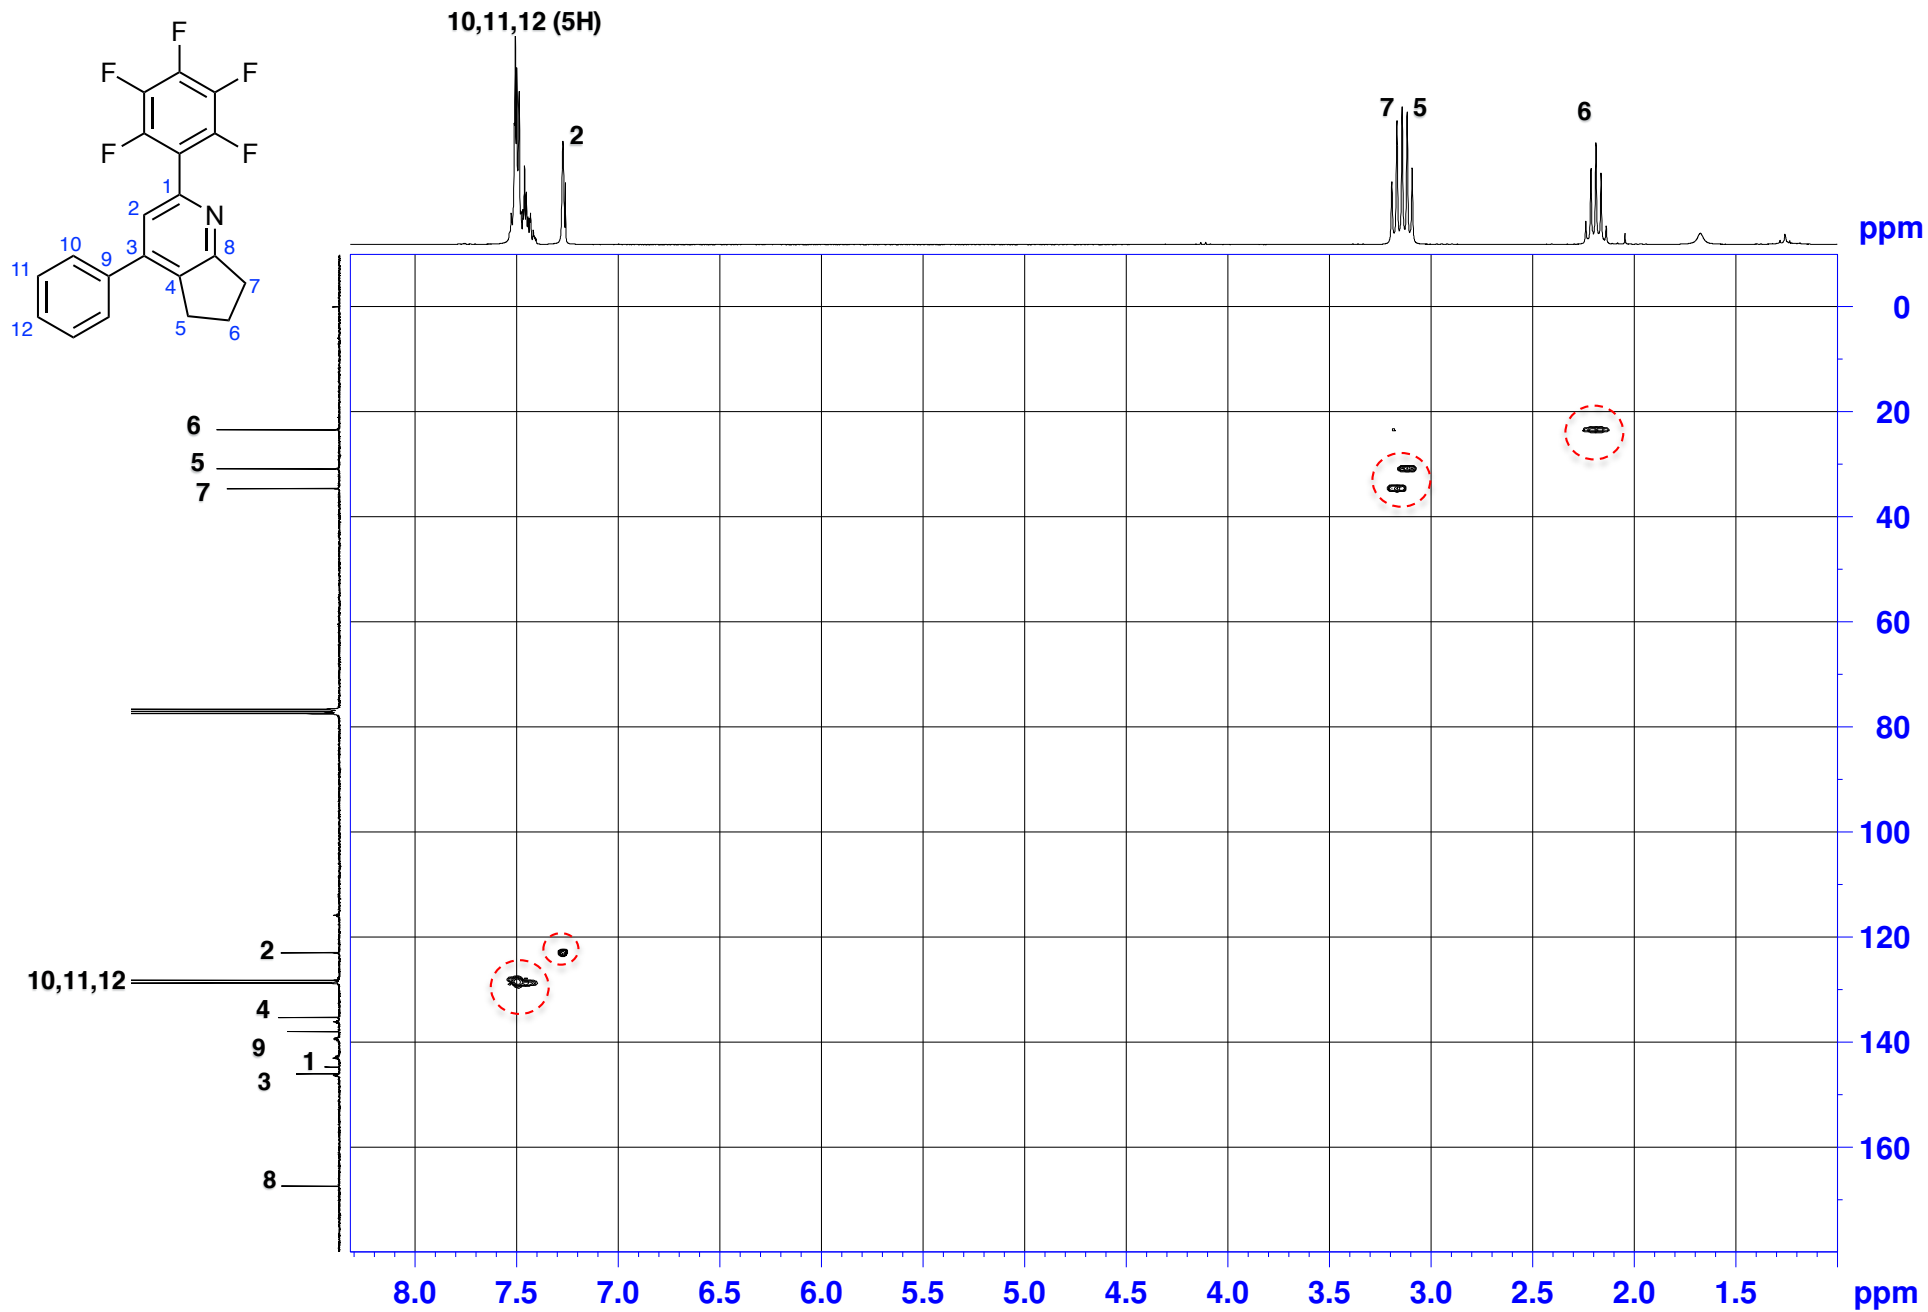

HMBC spectrum of **74**

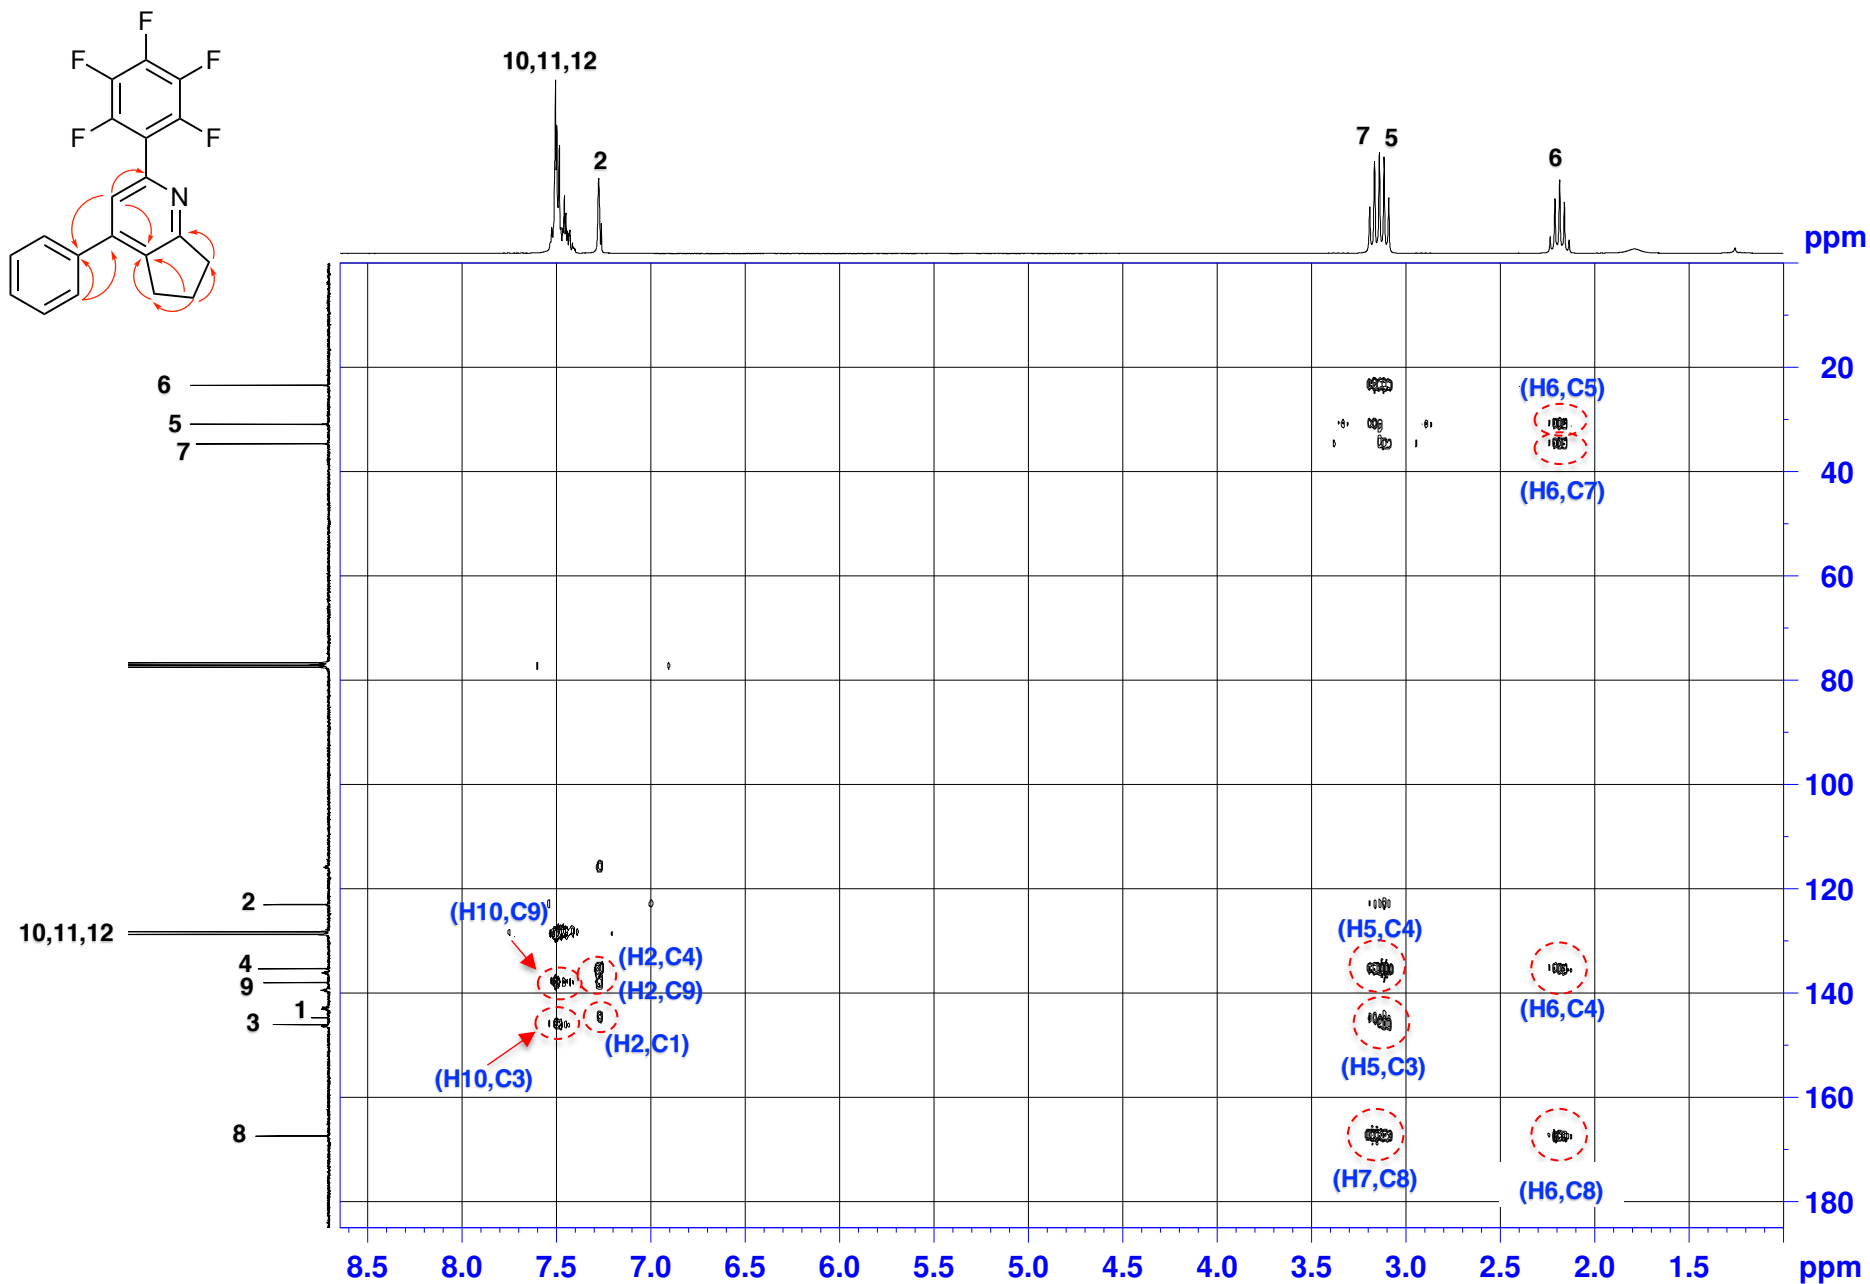

<sup>1</sup>H-NMR of **78** (300 MHz, CDCl<sub>3</sub>)

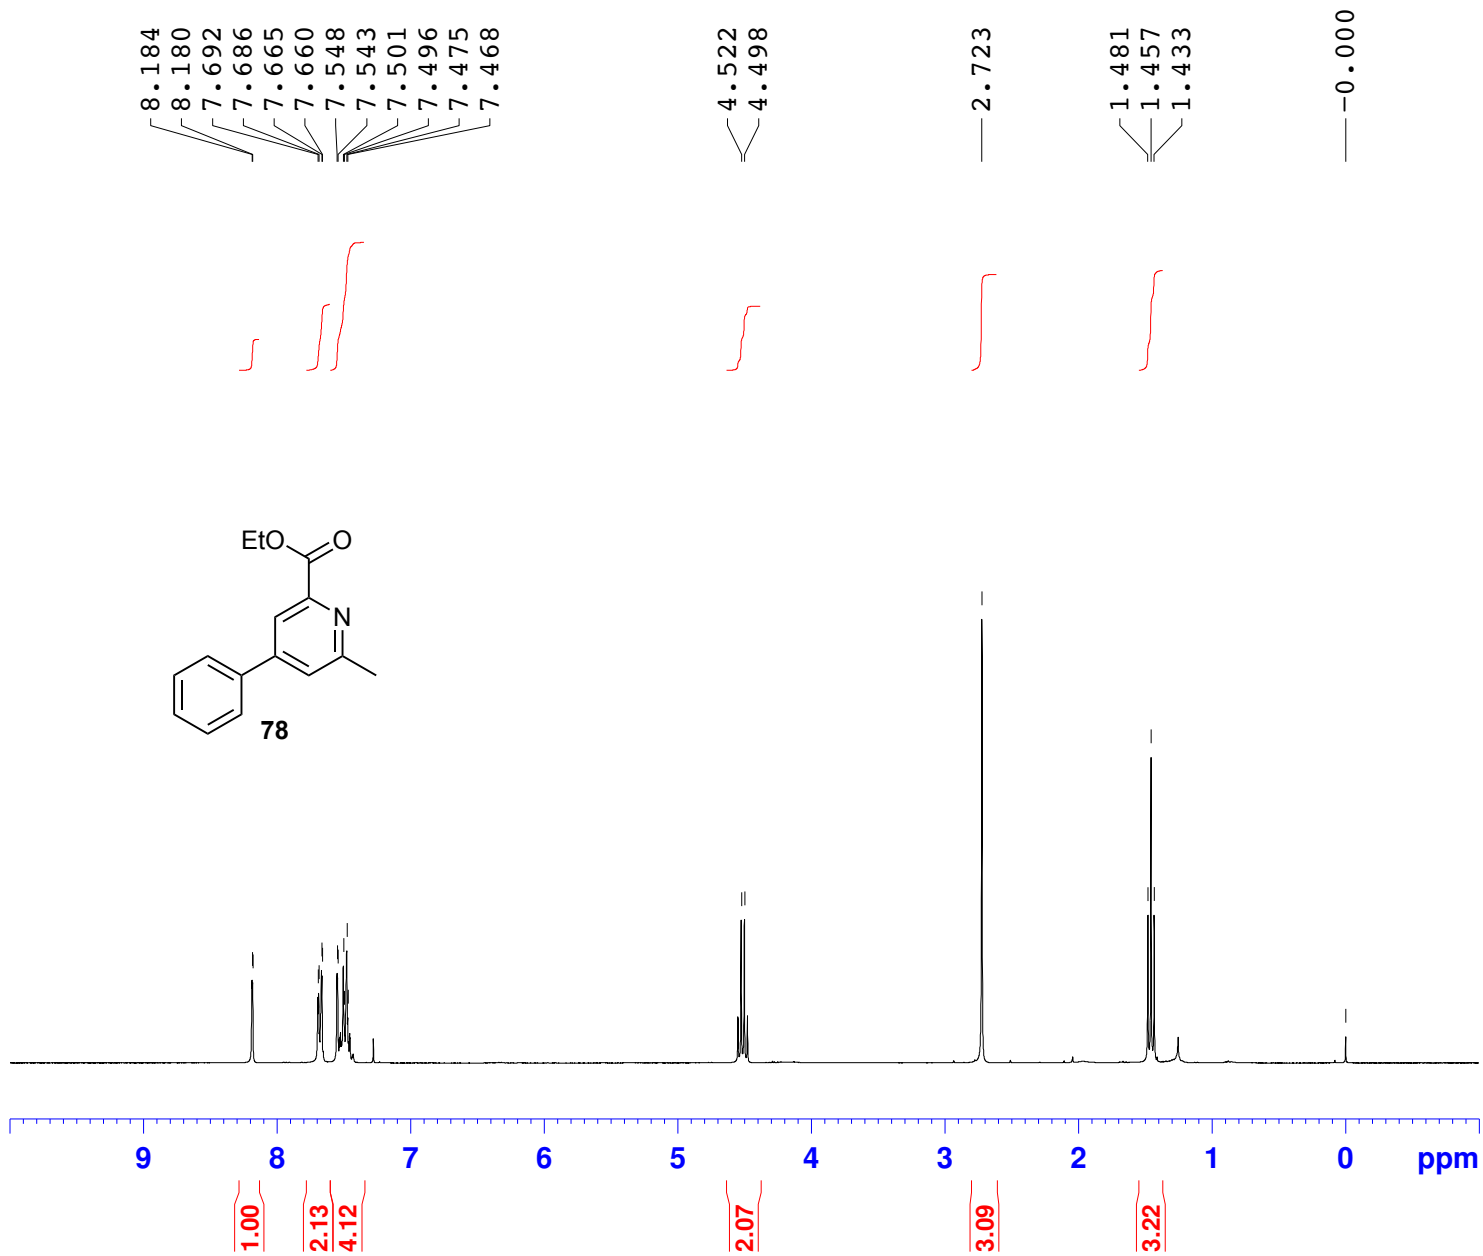

Current Data Parameters  
 NAME Yakka\_Yamada\_2  
 EXPNO 6400  
 PROCNO 1

F2 - Acquisition Parameters  
 Date\_ 20220129  
 Time 20.23  
 INSTRUM spect  
 PROBHD 5 mm PABBO BB-  
 PULPROG zg30  
 TD 65536  
 SOLVENT CDCl3  
 NS 16  
 DS 2  
 SWH 6188.119 Hz  
 FIDRES 0.094423 Hz  
 AQ 5.2953086 sec  
 RG 36  
 DW 80.800 usec  
 DE 6.50 usec  
 TE 294.5 K  
 D1 1.00000000 sec  
 TD0 1

==== CHANNEL f1 =====  
 SFO1 300.1318534 MHz  
 NUC1 1H  
 P1 15.00 usec  
 PLW1 8.00000000 W

F2 - Processing parameters  
 SI 32768  
 SF 300.1300012 MHz  
 WDW EM  
 SSB 0  
 LB 0.30 Hz  
 GB 0  
 PC 1.00

<sup>13</sup>C-NMR of **78** (75 MHz, CDCl<sub>3</sub>)

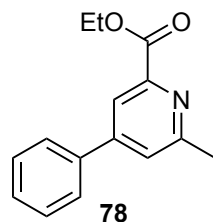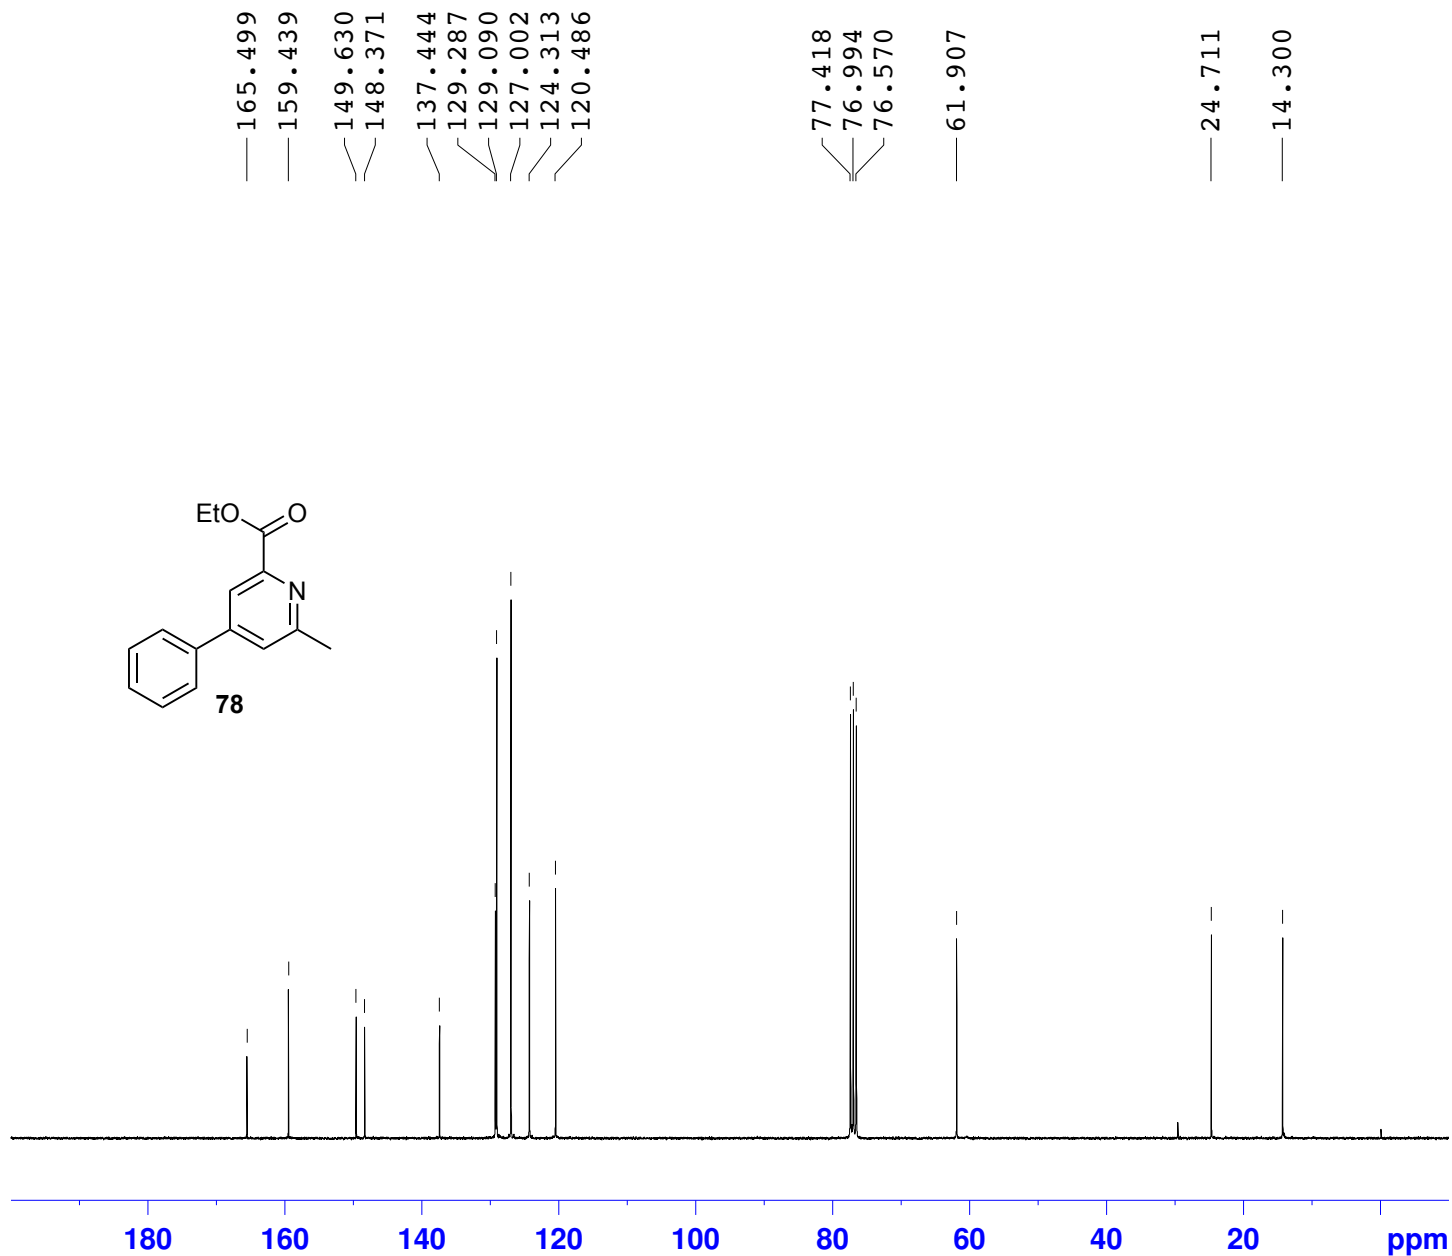

Current Data Parameters  
 NAME Yakka\_Yamada\_2  
 EXPNO 6402  
 PROCNO 1

F2 - Acquisition Parameters  
 Date\_ 20220130  
 Time\_ 23.42  
 INSTRUM spect  
 PROBHD 5 mm PABBO BB-  
 PULPROG zgpg30  
 TD 65536  
 SOLVENT CDCl3  
 NS 8000  
 DS 4  
 SWH 18028.846 Hz  
 FIDRES 0.275098 Hz  
 AQ 1.8175317 sec  
 RG 2050  
 DW 27.733 usec  
 DE 6.50 usec  
 TE 296.2 K  
 D1 2.00000000 sec  
 D11 0.03000000 sec  
 TD0 1

==== CHANNEL f1 =====  
 SFO1 75.4752953 MHz  
 NUC1 13C  
 P1 10.00 usec  
 PLW1 34.50000000 W

==== CHANNEL f2 =====  
 SFO2 300.1312005 MHz  
 NUC2 1H  
 CPDPRG[2] waltz16  
 PCPD2 80.00 usec  
 PLW2 8.00000000 W  
 PLW12 0.28125000 W  
 PLW13 0.18000001 W

F2 - Processing parameters  
 SI 32768  
 SF 75.4677539 MHz  
 WDW EM  
 SSB 0  
 LB 1.00 Hz  
 GB 0  
 PC 1.40

$^1\text{H}$ - $^1\text{H}$  COSY spectrum of 78

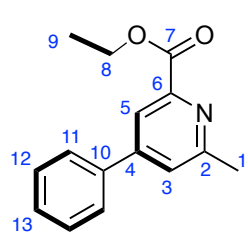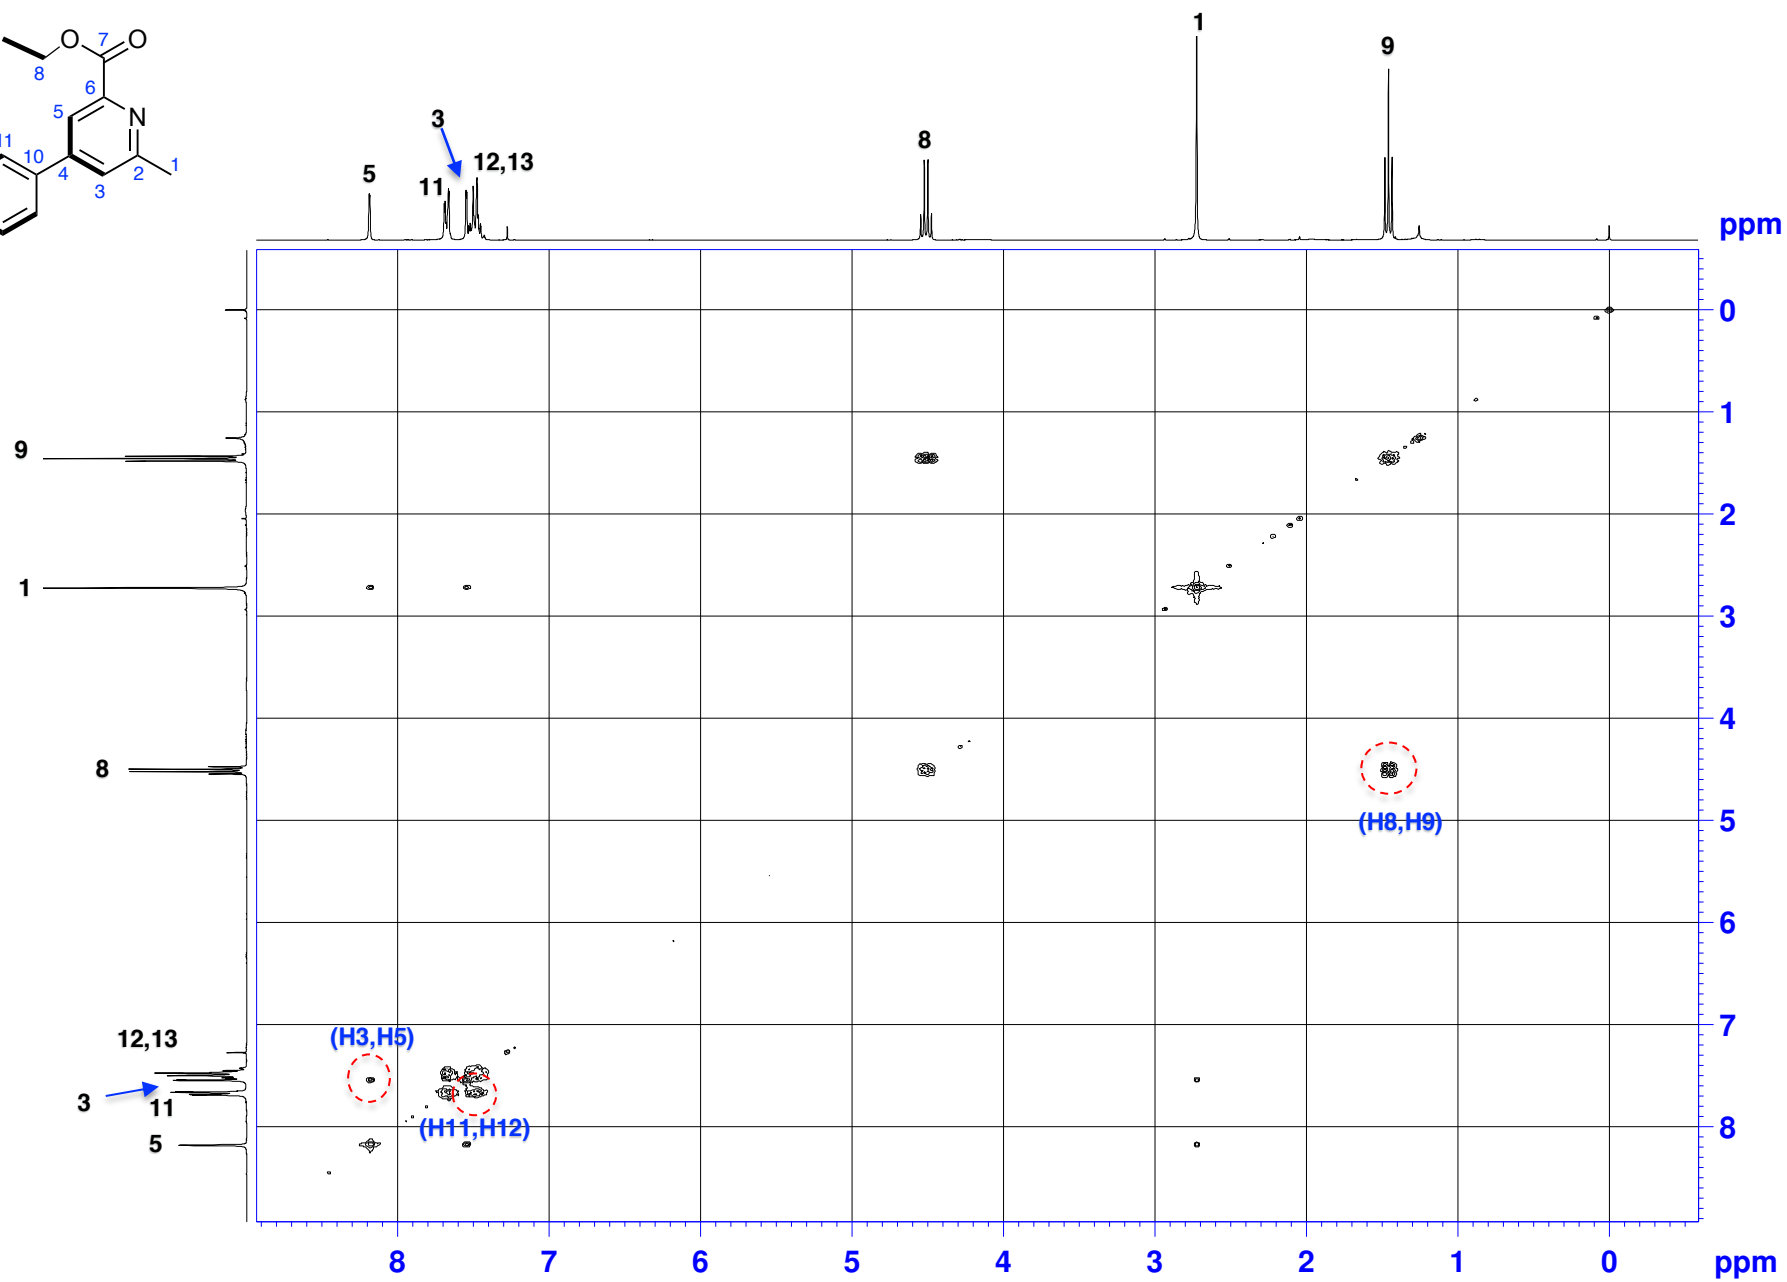



HSQC spectrum of 78

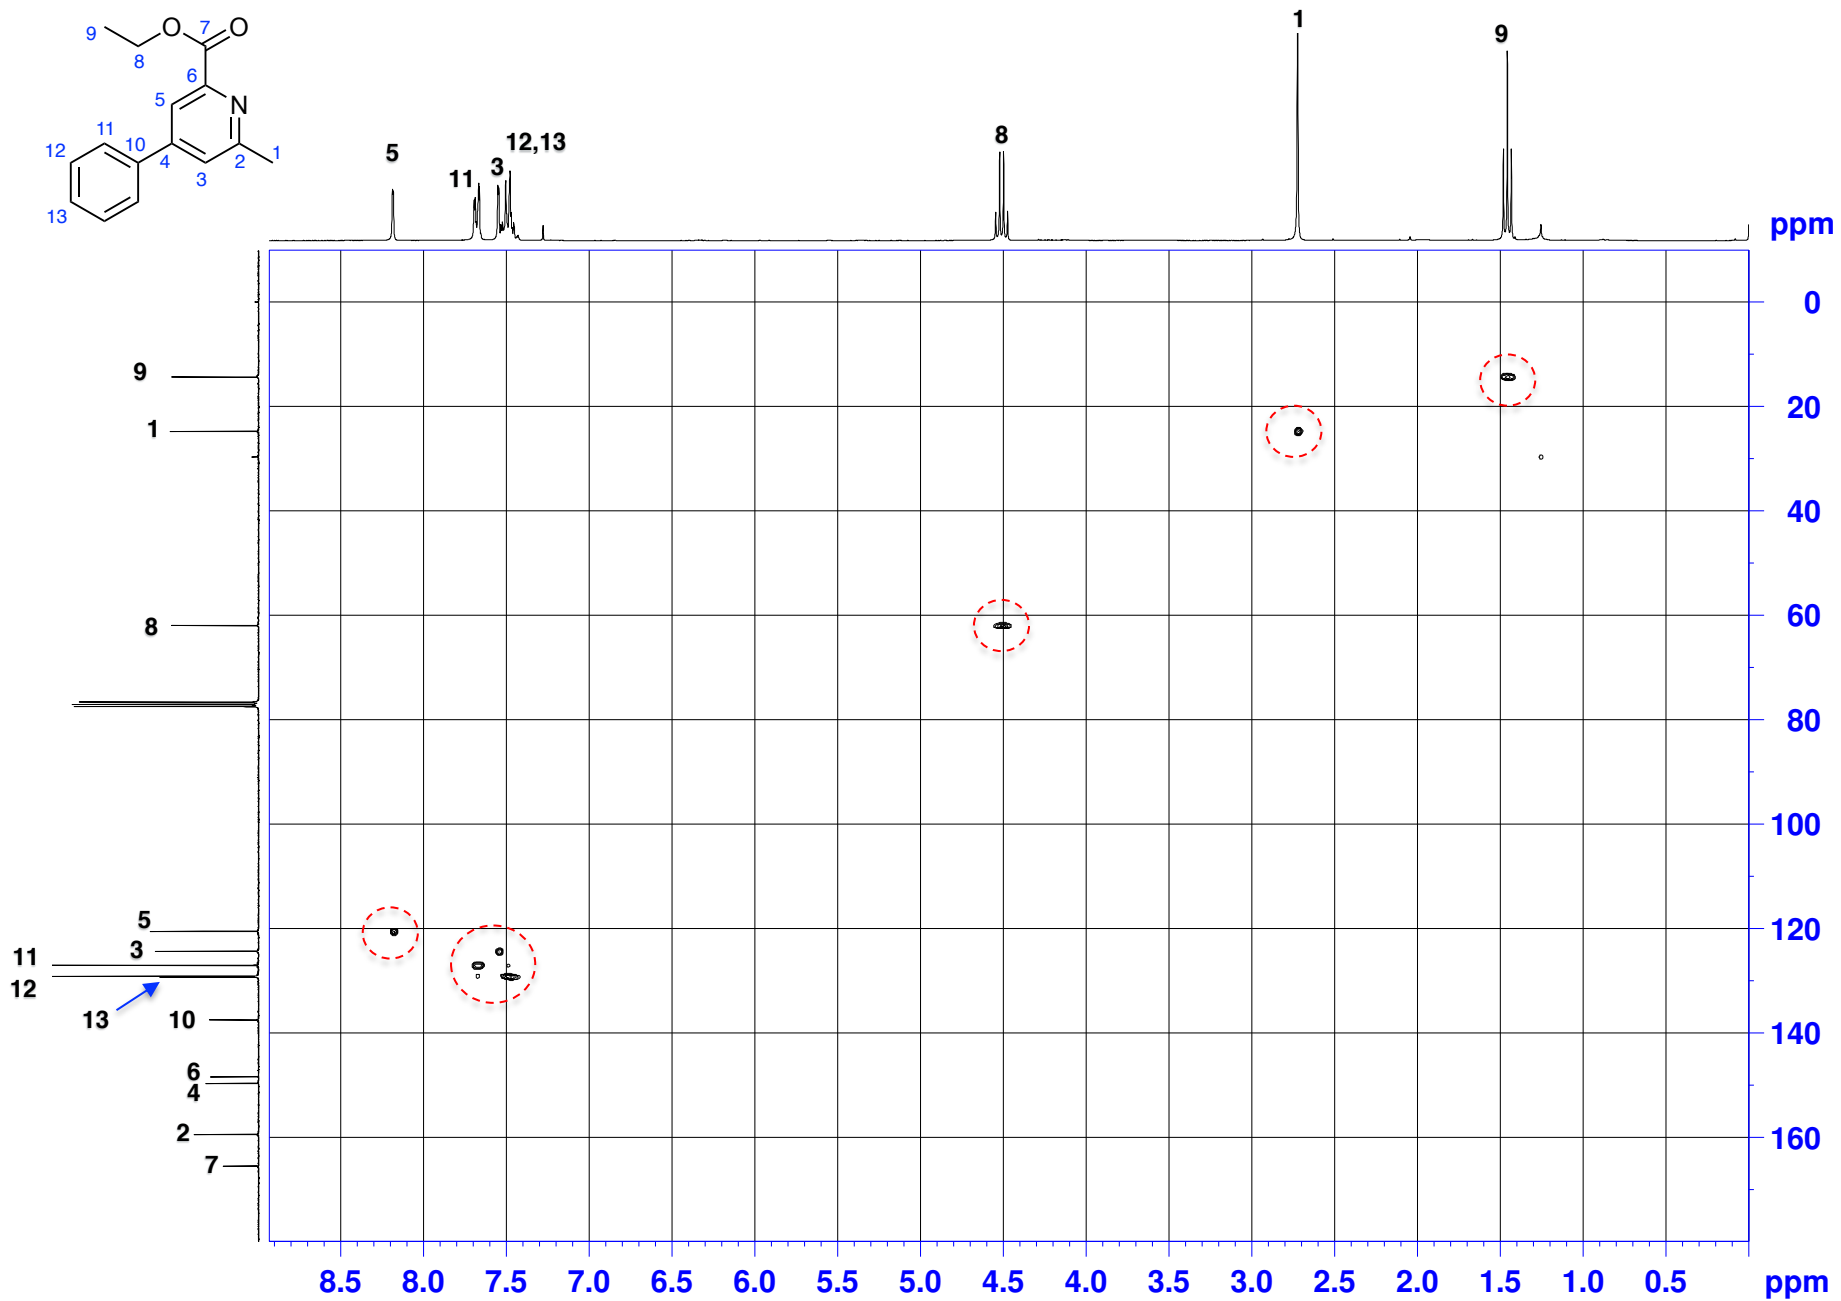

HMBC spectrum of 78

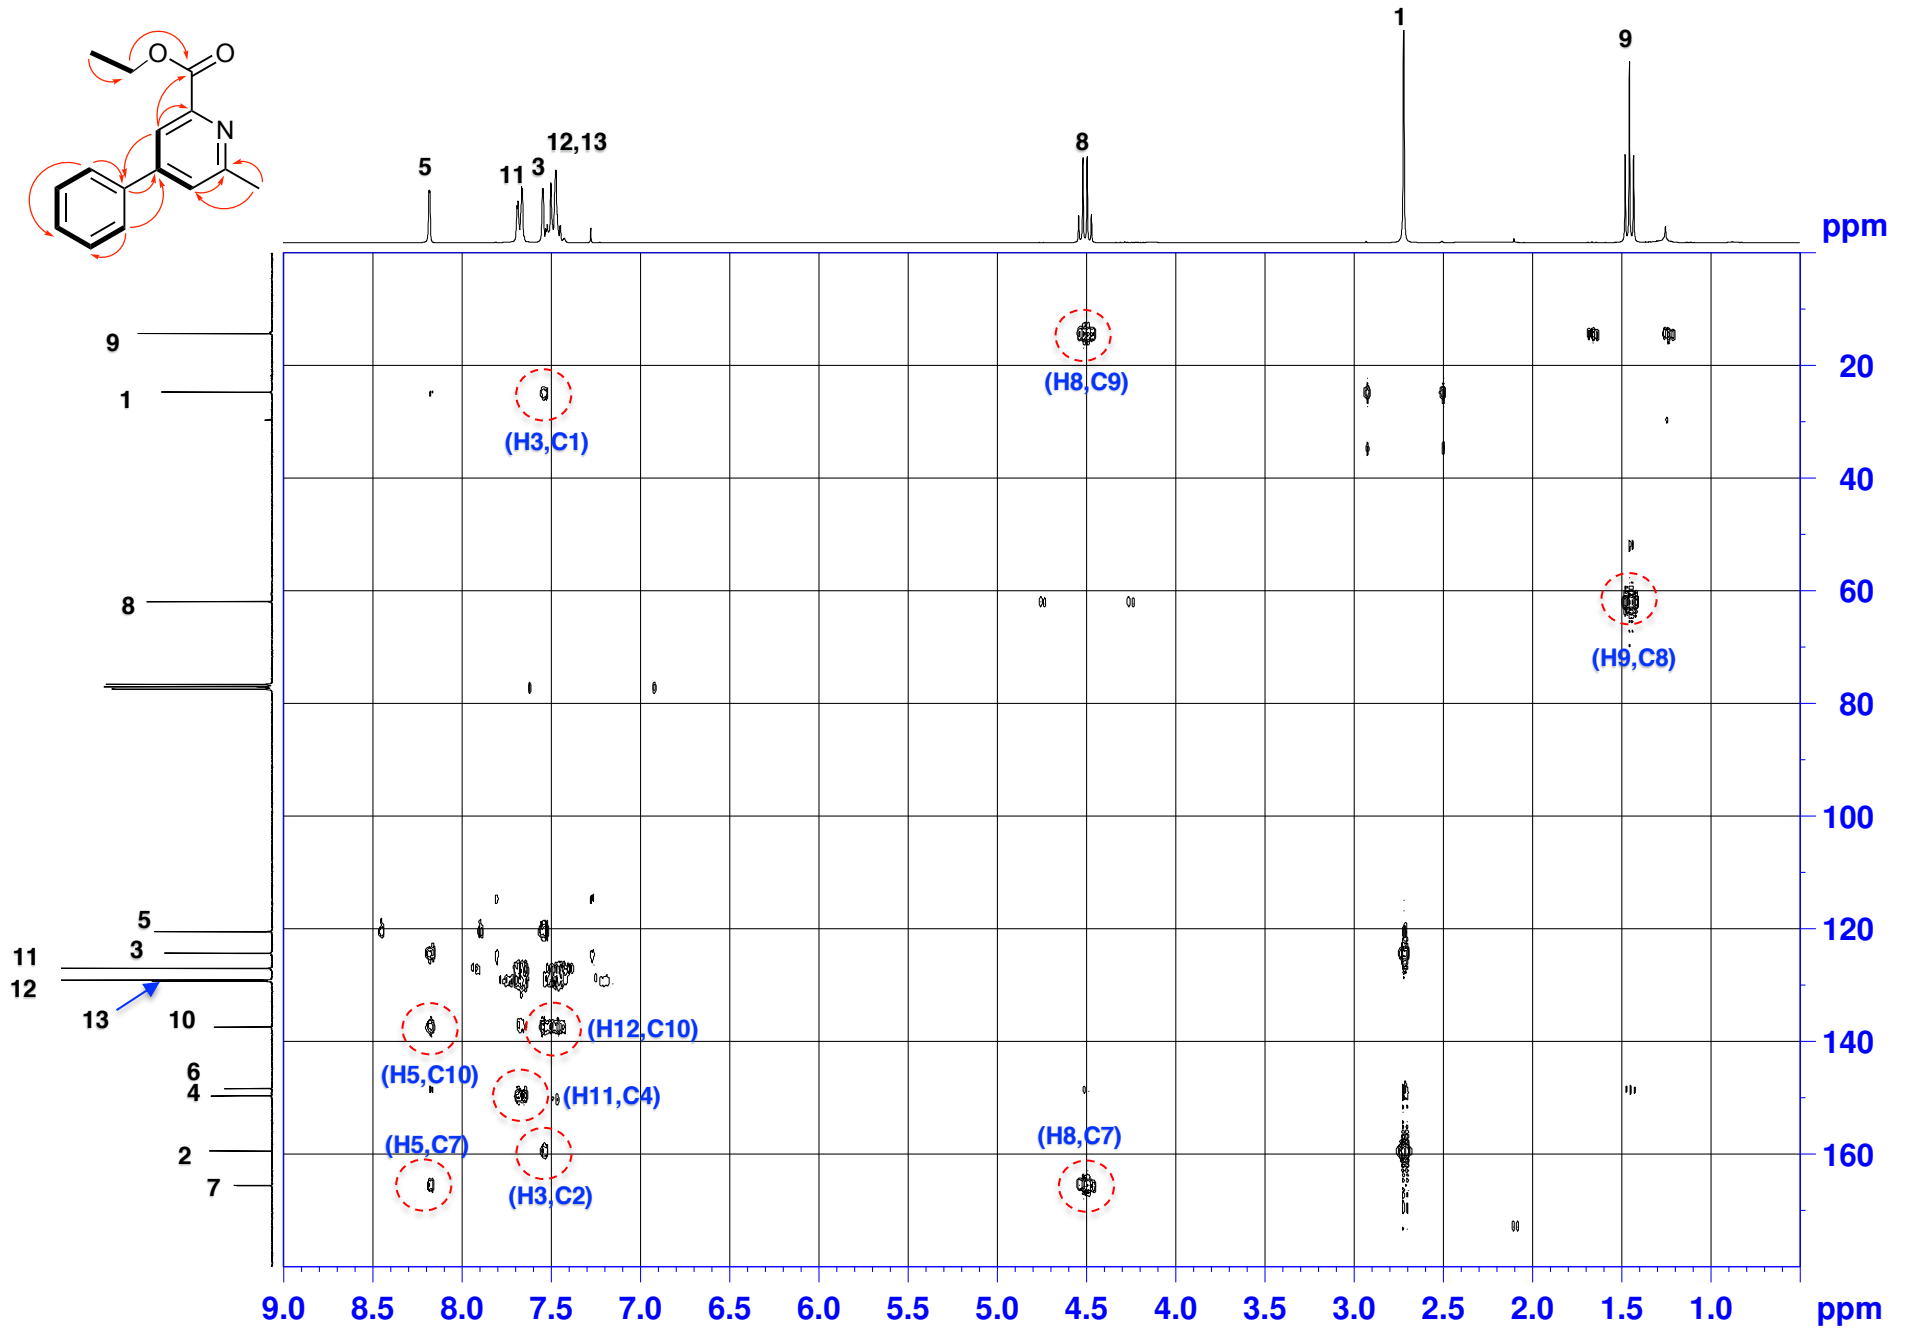

<sup>1</sup>H-NMR of (E)-11 (300 MHz, CDCl<sub>3</sub>)

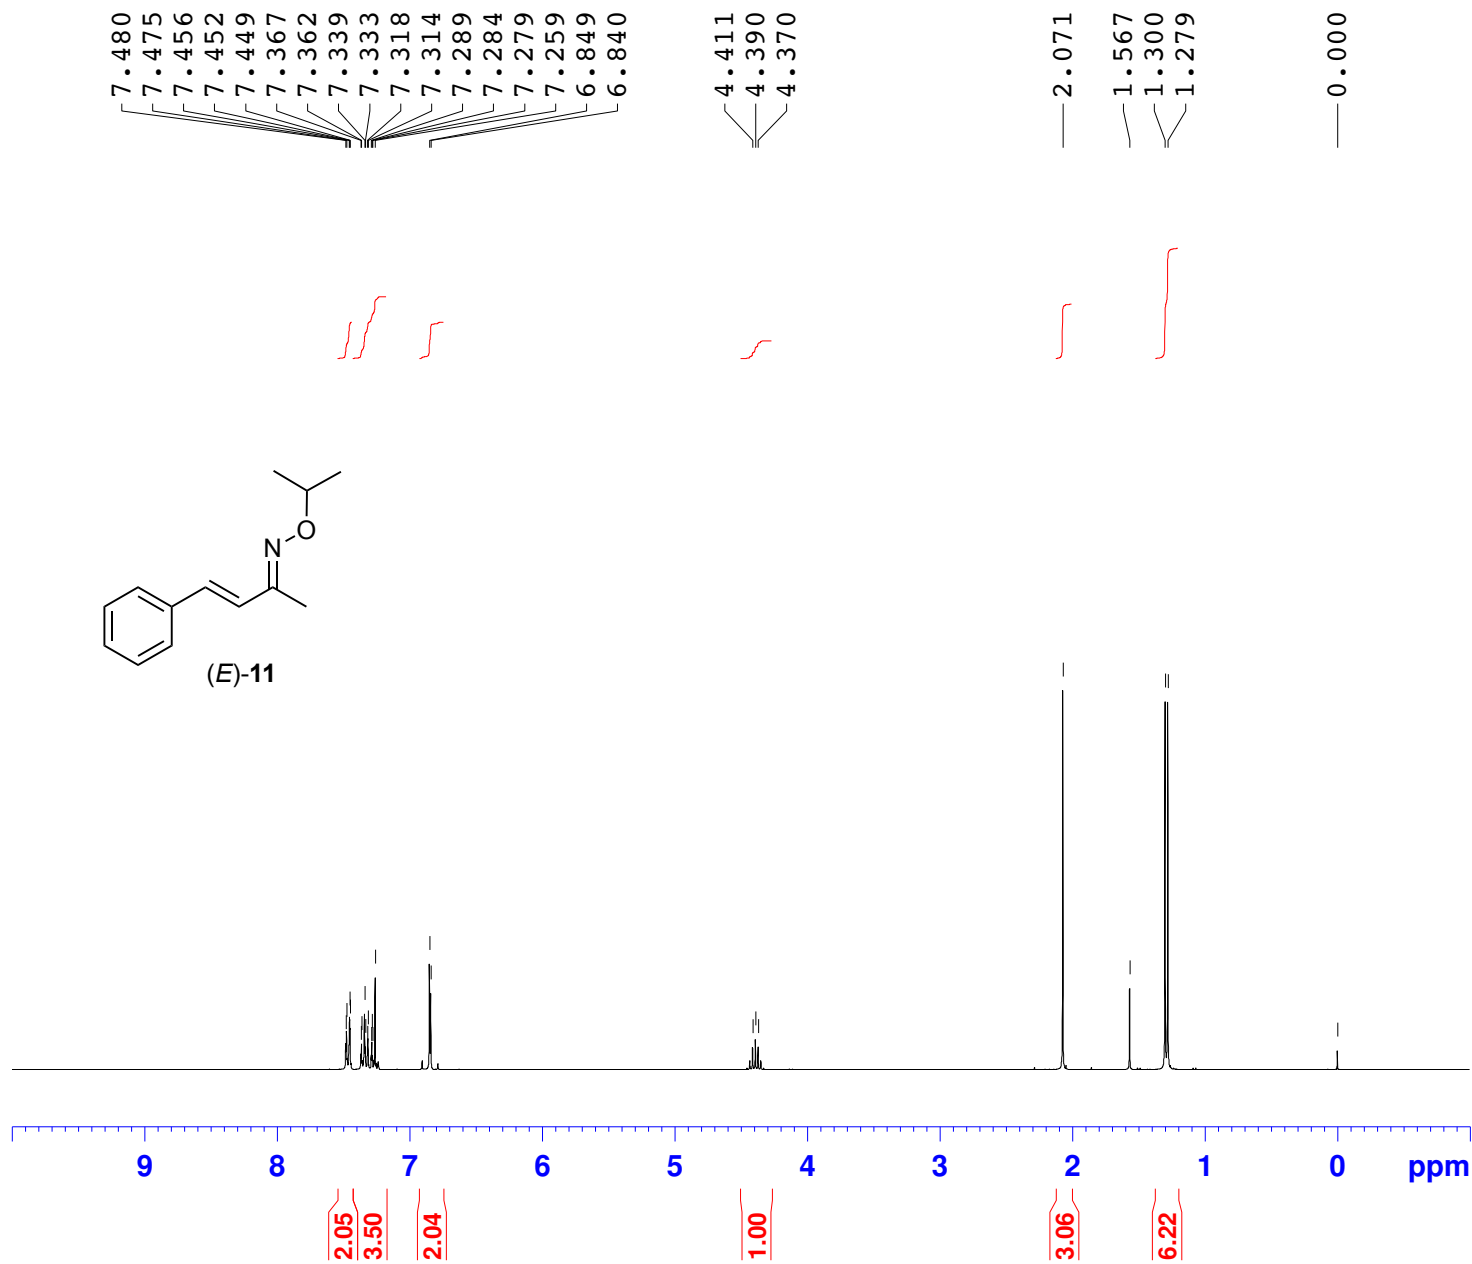

Current Data Parameters  
 NAME Yakka\_Yamada\_2  
 EXPNO 1850  
 PROCNO 1

F2 - Acquisition Parameters  
 Date\_ 20200324  
 Time 22.09  
 INSTRUM spect  
 PROBHD 5 mm PABBO BB-  
 PULPROG zg30  
 TD 65536  
 SOLVENT CDCl3  
 NS 16  
 DS 2  
 SWH 6188.119 Hz  
 FIDRES 0.094423 Hz  
 AQ 5.2953086 sec  
 RG 101  
 DW 80.800 usec  
 DE 6.50 usec  
 TE 294.8 K  
 D1 1.00000000 sec  
 TD0 1

==== CHANNEL f1 =====  
 SFO1 300.1318534 MHz  
 NUC1 1H  
 P1 15.00 usec  
 PLW1 6.19999981 W

F2 - Processing parameters  
 SI 32768  
 SF 300.1300062 MHz  
 WDW EM  
 SSB 0  
 LB 0.30 Hz  
 GB 0  
 PC 1.00

<sup>13</sup>C-NMR of (E)-11 (75 MHz, CDCl<sub>3</sub>)

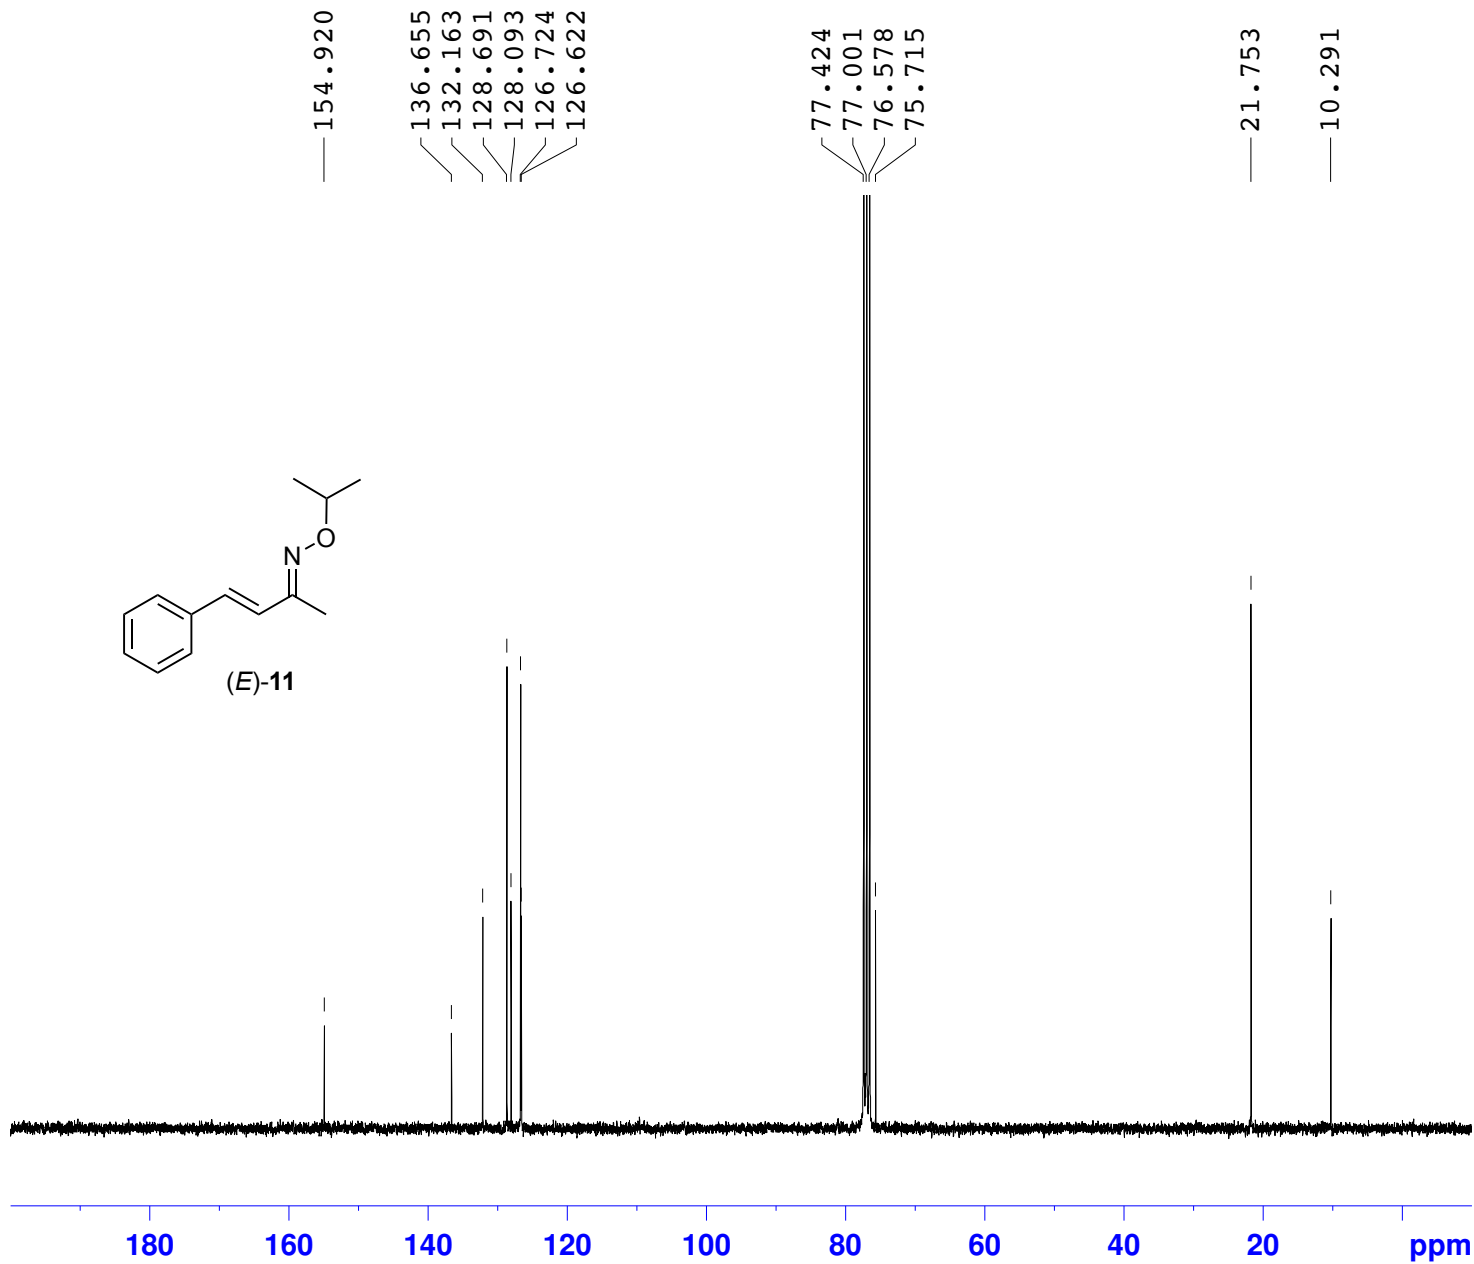

Current Data Parameters  
 NAME Yakka\_Yamada\_2  
 EXPNO 1871  
 PROCNO 1

F2 - Acquisition Parameters  
 Date\_ 20200325  
 Time 7.36  
 INSTRUM spect  
 PROBHD 5 mm PABBO BB-  
 PULPROG zgpg30  
 TD 65536  
 SOLVENT CDCl3  
 NS 4096  
 DS 4  
 SWH 18028.846 Hz  
 FIDRES 0.275098 Hz  
 AQ 1.8175317 sec  
 RG 2050  
 DW 27.733 usec  
 DE 6.50 usec  
 TE 296.1 K  
 D1 2.00000000 sec  
 D11 0.03000000 sec  
 TD0 1

===== CHANNEL f1 =====  
 SFO1 75.4752953 MHz  
 NUC1 13C  
 P1 10.00 usec  
 PLW1 34.20000076 W

===== CHANNEL f2 =====  
 SFO2 300.1312005 MHz  
 NUC2 1H  
 CPDPRG[2] waltz16  
 PCPD2 80.00 usec  
 PLW2 6.19999981 W  
 PLW12 0.17000000 W  
 PLW13 0.13950001 W

F2 - Processing parameters  
 SI 32768  
 SF 75.4677498 MHz  
 WDW EM  
 SSB 0  
 LB 1.00 Hz  
 GB 0  
 PC 1.40

<sup>1</sup>H-NMR of (Z)-11 (300 MHz, CDCl<sub>3</sub>)

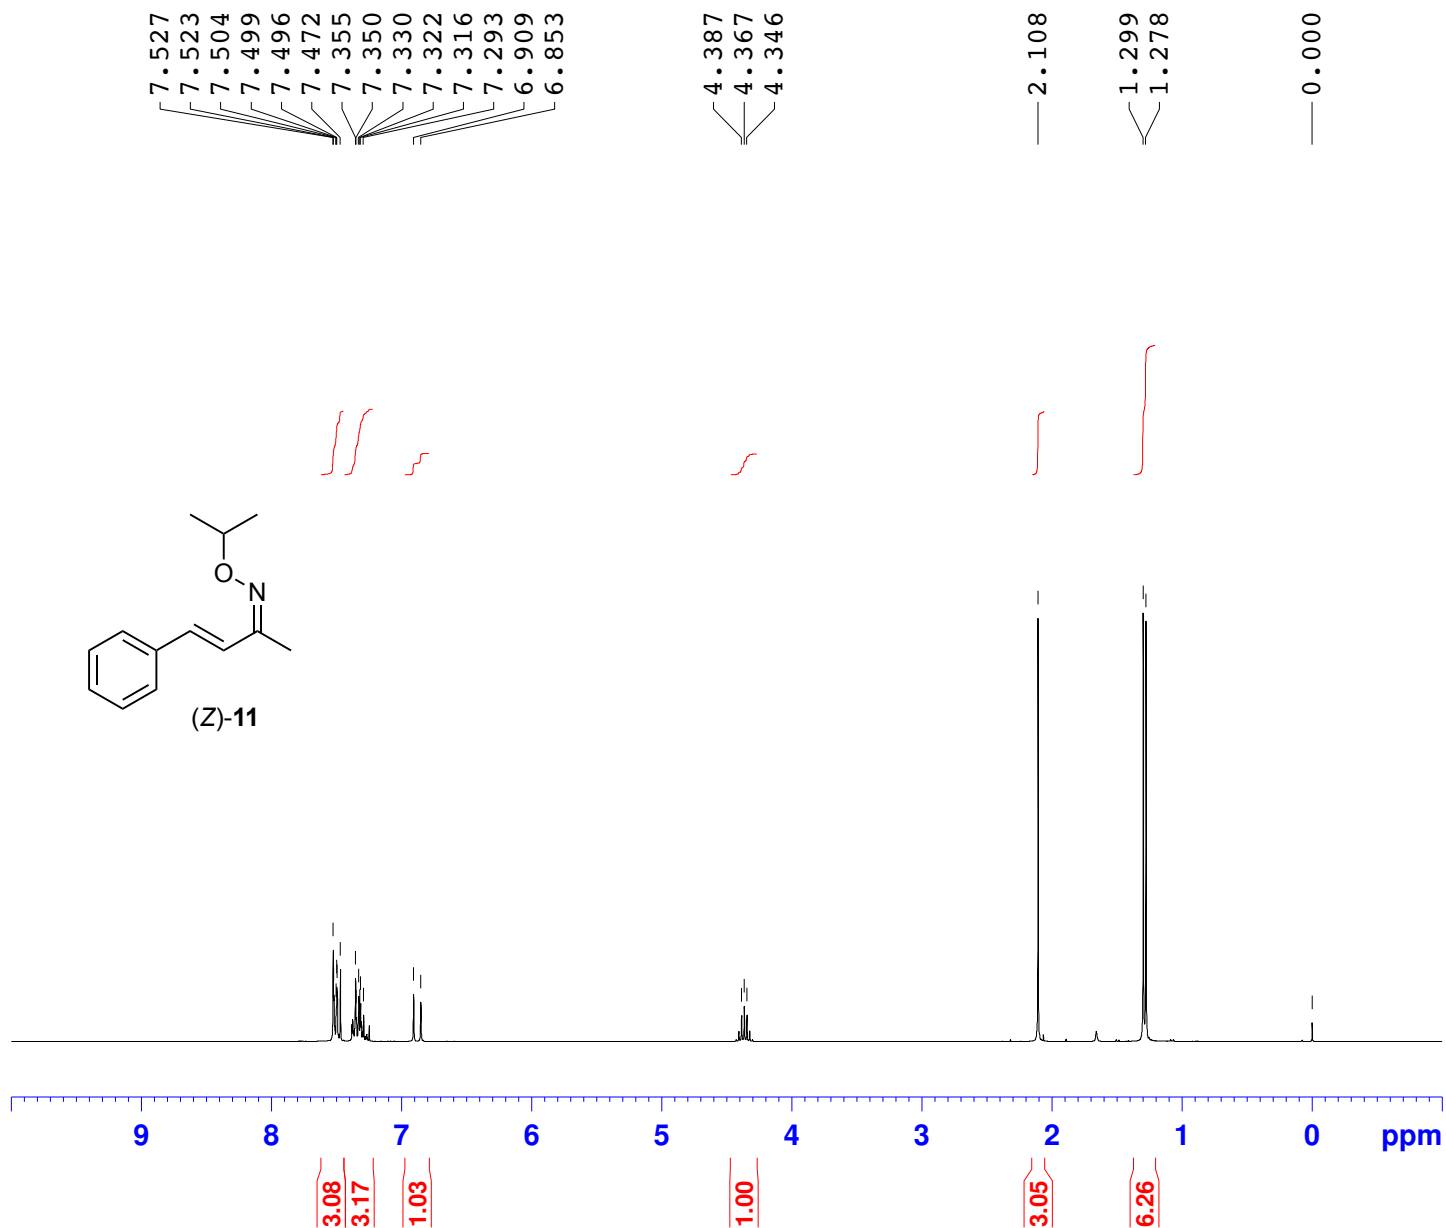

Current Data Parameters  
 NAME Yakka\_Yamada\_2  
 EXPNO 7660  
 PROCNO 1

F2 - Acquisition Parameters  
 Date\_ 20220709  
 Time\_ 13.43  
 INSTRUM spect  
 PROBHD 5 mm PABBO BB-  
 PULPROG zg30  
 TD 65536  
 SOLVENT CDCl3  
 NS 16  
 DS 2  
 SWH 6188.119 Hz  
 FIDRES 0.094423 Hz  
 AQ 5.2953086 sec  
 RG 20.2  
 DW 80.800 usec  
 DE 6.50 usec  
 TE 295.0 K  
 D1 1.00000000 sec  
 TD0 1

===== CHANNEL f1 =====  
 SFO1 300.1318534 MHz  
 NUC1 1H  
 P1 15.00 usec  
 PLW1 8.00000000 W

F2 - Processing parameters  
 SI 32768  
 SF 300.1300091 MHz  
 WDW EM  
 SSB 0  
 LB 0.30 Hz  
 GB 0  
 PC 1.00

<sup>13</sup>C-NMR of (Z)-11 (75 MHz, CDCl<sub>3</sub>)

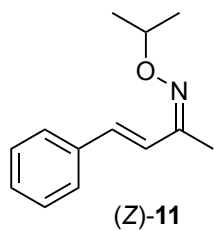

151.568  
 136.506  
 135.506  
 128.776  
 128.669  
 127.353  
 117.917

77.424  
 77.001  
 76.577  
 75.347

21.736  
 17.038

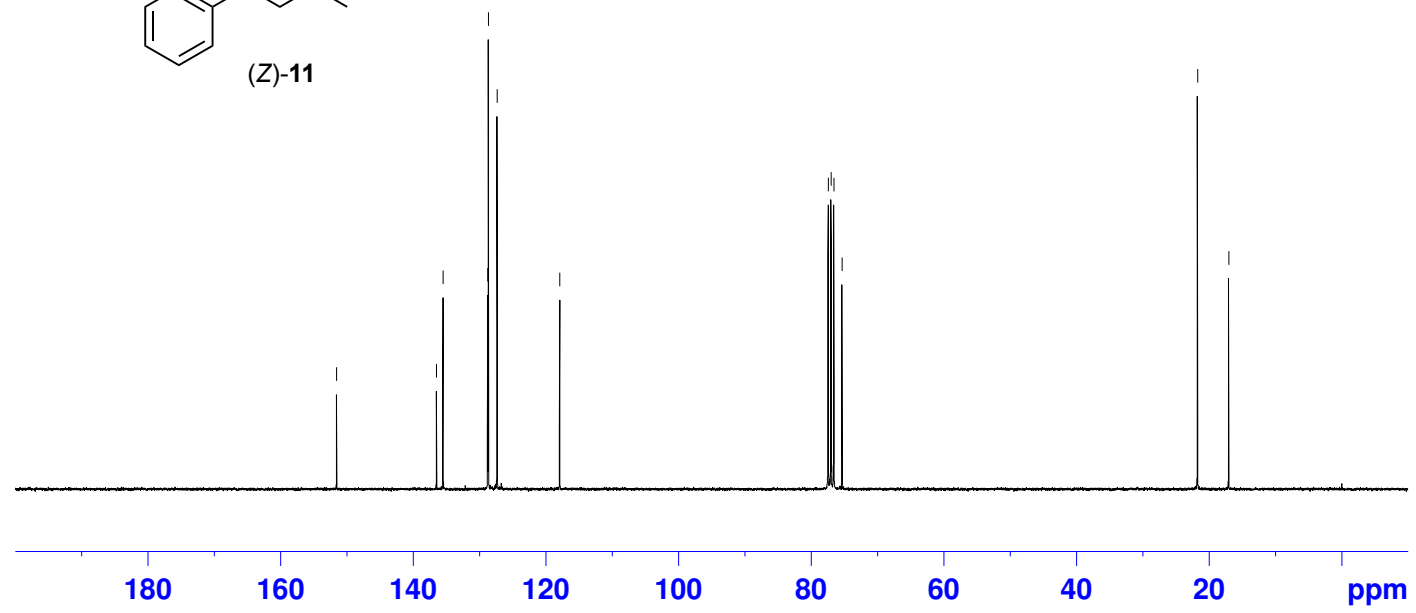

```

Current Data Parameters
NAME      Yakka_Yamada_2
EXPNO     7664
PROCNO    1

F2 - Acquisition Parameters
Date_     20220710
Time      11.39
INSTRUM   spect
PROBHD    5 mm PABBO BB-
PULPROG   zgpg30
TD         65536
SOLVENT   CDCl3
NS         3000
DS         4
SWH        18028.846 Hz
FIDRES     0.275098 Hz
AQ         1.8175317 sec
RG         2050
DW         27.733 usec
DE         6.50 usec
TE         296.7 K
D1         2.00000000 sec
D11        0.03000000 sec
TD0        1

===== CHANNEL f1 =====
SFO1      75.4752953 MHz
NUC1       13C
P1         10.00 usec
PLW1      34.50000000 W

===== CHANNEL f2 =====
SFO2      300.1312005 MHz
NUC2       1H
CPDPRG[2]  waltz16
PCPD2     80.00 usec
PLW2      8.00000000 W
PLW12     0.28125000 W
PLW13     0.18000001 W

F2 - Processing parameters
SI         32768
SF         75.4677513 MHz
WDW        EM
SSB        0
LB         1.00 Hz
GB         0
PC         1.40
  
```
